# Supplementary material for: Identification and Initial Characterization of the Effectors of an Anther Smut Fungus and Potential Host Target Proteins
Source: MDPI journal article supplement (doi:10.3390/ijms18112489), 2017-11-22
Supplement: s1 [file s1]

## Supplementary Methods

### Prediction of secreted proteins

Prediction of secreted proteins was performed using a combination of online tools: TargetP1.1, SignalP3.0, SignalP4.0, TMHMM2.0, PredGPI, Phobius, NucPred, Prosite and WoLF PSORT.

The initial absolute cutoffs for excluding non-secreted proteins are listed in the following table.

Criteria for secretome discovery.

| Tools   | Cutoff for non-SP                             | Remain in pool of probable secretome                                                     |
|---------|-----------------------------------------------|------------------------------------------------------------------------------------------|
| TMHMM   | >2 TMs                                        | $\leq 2$ TMs                                                                             |
| Phobius | >2TMs                                         | $\leq 2$ TMs                                                                             |
| Prosite | ER retention signal: 00014                    | -                                                                                        |
| PredGPI | Specificity of >99.5% using the General Model | Specificity of <99.5, where 99.0-99.5 is characterized as lowly probably for GPI linkage |
| NucPred | Threshold>0.8                                 | Threshold<0.8                                                                            |

The following guidelines were then used in determining whether the protein was secreted or not. Out of the 6 tests for indicating SP localization, at least 4 tests should be positive for SP in order to remain in the probable SP pool.

Further guidelines for secretome discovery on the remaining pool of probable secretome.

| Tools          | Guideline for SP                |
|----------------|---------------------------------|
| TargetP        | Predicted localization to “SP”  |
| SignalP3.0 NN  | D-score>0.43                    |
| SignalP3.0 HMM | Sprob>0.8                       |
| SignalP4.0     | D-score>0.45                    |
| WoLF Psort     | “Extr” listed as major neighbor |
| Phobius        | “Y” for SP                      |

Where there are ambiguous predictions, TMHMM and Phobius have to agree on the existence of 1-2 TM(s) on the protein to exclude it from the probable secretome pool. In addition, if a protein is predicted with “lowly probable” GPI linkage, but has TM predicted by TMHMM and/or Phobius around the same region, they serve as corroborating evidence for anchorage to the membrane

Where there were contractions or insufficient evidence for determining secretome status, BLASTp and Pfam domains is used to establish probable orthologs, followed by referencing the UniProtKB and FunSecKB database for confirmation of localization of the orthologs, where available.

## **Analysis of intrinsic disorder predisposition and presence of functional sites in proteins encoded by 49 MVLG genes**

For each protein, we present:

- 1) MVLG ID and disorder content evaluated by PONDR VSL2 [67].
- 2) Amino acid sequence. Position of secretion signal peptide found by SignalP4.1 [68] are shown by red bold font.
- 3) Results of intrinsic disorder predisposition analysis by four predictors of PONDR family, PONDR<sup>®</sup> VSL2 [67], PONDR<sup>®</sup> VLXT [69], PONDR<sup>®</sup> VL3 [70], and PONDR<sup>®</sup> FIT [71].
- 4) PONDR<sup>®</sup> VSL2 disorder prediction statistics including location of predicted disordered regions.
- 5) Results of evaluation of the presence and localization of disorder-based binding sites conducted using the ANCHOR algorithm [72, 73].
- 6) Presence of possible post-translational modification sites found by ModPred [74]. Prediction results with High Confidence are listed.
- 7) Presence of possible functions found by PROSITE [75, 76].
- 8) Molecular models built using SWISS-MODEL [56, 57].

## **References**

18. Peng, K.; Radivojac, P.; Vucetic, S.; Dunker, A.K.; Obradovic, Z. Length-dependent prediction of protein intrinsic disorder. *Bmc Bioinformatics* **2006**, *7*.
19. Romero, P.; Obradovic, Z.; Li, X.H.; Garner, E.C.; Brown, C.J.; Dunker, A.K. Sequence complexity of disordered protein. *Proteins-Structure Function and Genetics* **2001**, *42*, 38-48.
20. Peng, K.; Vucetic, S.; Radivojac, P.; Brown, C.J.; Dunker, A.K.; Obradovic, Z. Optimizing long intrinsic disorder predictors with protein evolutionary information. *Journal of bioinformatics and computational biology* **2005**, *3*, 35-60.
21. Xue, B.; Dunbrack, R.L.; Williams, R.W.; Dunker, A.K.; Uversky, V.N. Ponder-fit: A meta-predictor of intrinsically disordered amino acids. *Bba-Proteins Proteom* **2010**, *1804*, 996-1010.
22. Dosztanyi, Z.; Meszaros, B.; Simon, I. Anchor: Web server for predicting protein binding regions in disordered proteins. *Bioinformatics* **2009**, *25*, 2745-2746.
23. Meszaros, B.; Simon, I.; Dosztanyi, Z. Prediction of protein binding regions in disordered proteins. *Plos Computational Biology* **2009**, *5*.
33. Pejaver, V.; Hsu, W.L.; Xin, F.; Dunker, A.K.; Uversky, V.N.; Radivojac, P. The structural and functional signatures of proteins that undergo multiple events of post-translational modification. *Protein Sci* **2014**, *23*, 1077-1093.
57. Petersen, T.N.; Brunak, S.; von Heijne, G.; Nielsen, H. Signalp 4.0: Discriminating signal peptides from transmembrane regions. *Nat Methods* **2011**, *8*, 785-786.
58. Sigrist, C.J.; de Castro, E.; Cerutti, L.; Cuče, B.A.; Hulo, N.; Bridge, A.; Bougueleret, L.; Xenarios, I. New and continuing developments at prosite. *Nucleic Acids Res* **2013**, *41*, D344-347.
59. de Castro, E.; Sigrist, C.J.; Gattiker, A.; Bulliard, V.; Langendijk-Genevaux, P.S.; Gasteiger, E.; Bairoch, A.; Hulo, N. Scanprosite: Detection of prosite signature matches and prerule-associated functional and structural residues in proteins. *Nucleic Acids Res* **2006**, *34*, W362-365.
60. Berardini, T. Z., Reiser, L., Li, D., Mezheritsky, Y., Muller, R., Strait, E., and Huala, E. (2015) The Arabidopsis information resource: Making and mining the "gold standard" annotated reference plant genome. *Genesis (New York, N.Y. : 2000)* **53**, 474-485

**Table S1: List of Predicted Secreted Proteins (see separate Excel File)**

**Table S2: Mostly disordered proteins (>50% disordered residues by PONDR® VSL2 analysis; percent disordered indicated in parentheses after the protein name; amino acids shown in **red** indicate the predicted signal peptide)**

**> MVLG\_01284T0 (94.01%)- 217aa**

**MLMLKSLSVLIVAASAAHAL**QSPAAASNLERGLTDGTTGLLDNLPGLPGLGDLLGGGGKTTTGK  
VKRELDDFVSDTNSATPVKSPPGTDSALNDVTS DHNVLPQDAGLES LIPGLH KRQDEDEVDQDEDD  
VDSNSGLDAGAEVDADFDLVRRGYRKASEVKFKVNEPKPATFVKKSKKHPKTADKEHGKKHDGV  
HKKPDEEHKKHDEVPKKHPVA

**PONDR:**

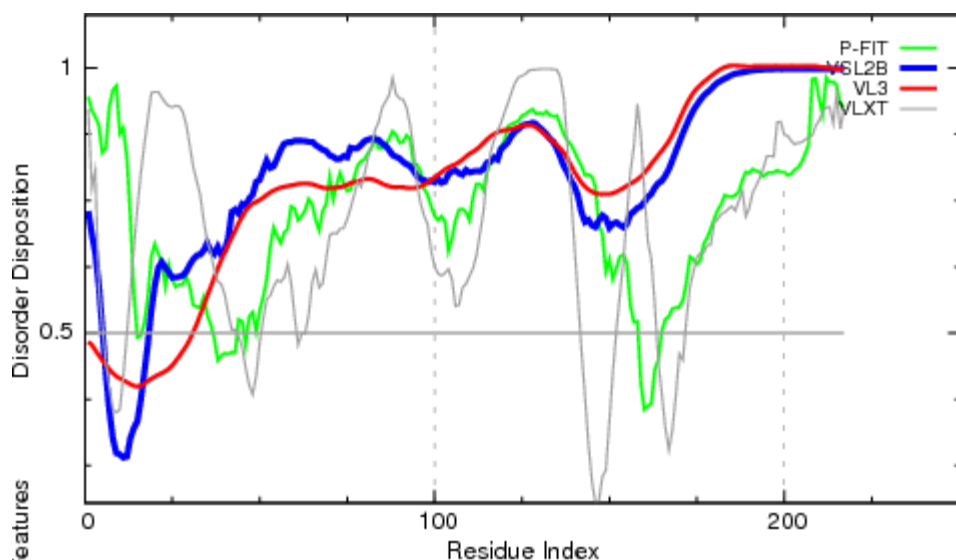

=====PONDR VSL2 STATISTICS=====

|                                       |                                  |
|---------------------------------------|----------------------------------|
| Predicted residues: 217               | Number Disordered Regions: 2     |
| Number residues disordered: 204       | Longest Disordered Region: 199   |
| Overall percent disordered: 94.01     | Average Prediction Score: 0.7951 |
| Predicted disorder segment [1]-[5]    | Average Strength= 0.6332         |
| Predicted disorder segment [19]-[217] | Average Strength= 0.8290         |

**ANCHOR:**

| Predicted Disordered Binding Regions |      |     |        |
|--------------------------------------|------|-----|--------|
|                                      | From | To  | Length |
| 1                                    | 41   | 56  | 16     |
| 2                                    | 68   | 78  | 11     |
| 3                                    | 91   | 118 | 28     |
| 4                                    | 136  | 178 | 43     |
| 5                                    | 209  | 217 | 9      |
| Filtered Regions                     |      |     |        |
|                                      | From | To  | Length |

|   |     |     |    |
|---|-----|-----|----|
| 1 | 1   | 14  | 14 |
| 2 | 192 | 192 | 1  |

### ModPred and PROSITE:

ModPred: Sumoylation (K5), Amidation (G37, F73, P86, D128, F148, E160, E208), ADP-ribosylation (R68), Phosphorylation (T81), Proteolytic cleavage (D133, R152, K162, T172, H192, D193).

PROSITE: No identified domain recognition sites.

### Structural modelling:

| Name                                                                                                                                                | Title | Identity | Method      | Oligo State     | Ligands |
|-----------------------------------------------------------------------------------------------------------------------------------------------------|-------|----------|-------------|-----------------|---------|
|  <a href="#">5bs7.1.F</a> Protein SPT2 homolog                     |       | 26.83    | X-ray, 3.3Å | hetero-oligomer | None    |
|  <a href="#">5g1k.1.B</a> THIOL DISULFIDE INTERCHANGE PROTEIN DSBG |       | 30.30    | X-ray, 2.0Å | homo-dimer      | None    |
|  <a href="#">1ywf.1.A</a> PHOSPHOTYROSINE PROTEIN PHOSPHATASE PTPB |       | 23.08    | X-ray, 1.7Å | monomer         | None    |

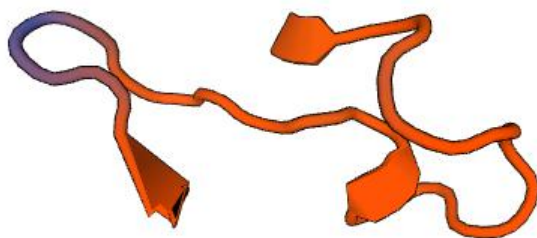

Model #1: Residues 43-68 of MVLG\_01284T0 with 1ywf.1.A (23.08 % sequence identity) as a template

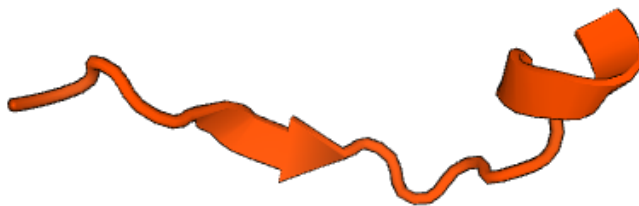

Model #2: Residues 138-153 of MVLG\_01284T0 with 5bs7.1.F (26.83 % sequence identity) as a template

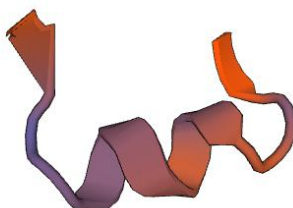

Model #3: Residues 21-35 of MVLG\_01284T0 with 5g1k.1.B (30.30 % sequence identity) as a template

> MVLG\_00385T0 (90.32%)

**MHIHFTVLSASALLALSHA**APTPGGPSSVHNVSPKYGPDSKCFHYFDHLDEYKPKYGCQDYEQ  
YKCSYADAYYVKKKAEQDKKEAECKKQDYDFKKHTWHYTSVKNSFEEEEKKKYNALLKQYNLET  
TRYEEHKKNYEAFKRAREEENRKNEETKKYCEKVFEVKEYFKPKQSYHIDGHQNSHGGGNLKG  
GKGFAGKKDEDEGEKEGGHGGVKNVGGKDGKGRKDGKDGKLDDKDEHDGKDGHDGKASKIH  
GKKDEKCHDEKKDFSSGGNPKSGW

#### PONDR:

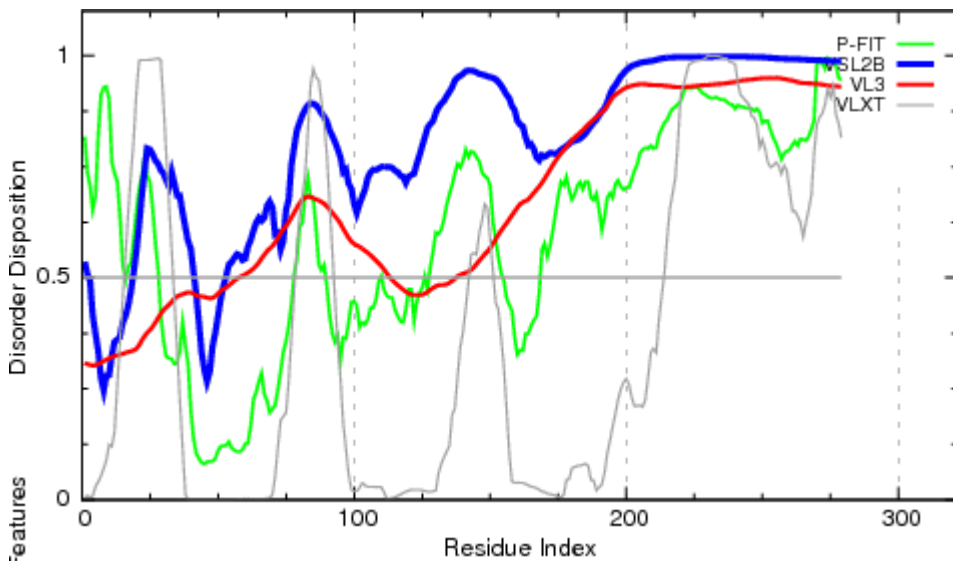

#### PONDR VSL2 STATISTICS

|                                       |                                  |
|---------------------------------------|----------------------------------|
| Predicted residues: 279               | Number Disordered Regions: 3     |
| Number residues disordered: 252       | Longest Disordered Region: 227   |
| Overall percent disordered: 90.32     | Average Prediction Score: 0.7983 |
| Predicted disorder segment [1]-[2]    | Average Strength= 0.5224         |
| Predicted disorder segment [19]-[41]  | Average Strength= 0.6797         |
| Predicted disorder segment [53]-[279] | Average Strength= 0.8639         |

#### ANCHOR:

| Predicted Disordered Binding Regions |      |     |        |
|--------------------------------------|------|-----|--------|
|                                      | From | To  | Length |
| 1                                    | 119  | 125 | 7      |
| 2                                    | 158  | 180 | 23     |
| 3                                    | 250  | 257 | 8      |
| 4                                    | 267  | 279 | 13     |

#### ModPred and PROSITE:

ModPred:Proteolytic cleavage (Y75, K228, D229, D232, D242, D248, K267), Amidation (Q92), Carboxylation (E127, E133, E146, E147, E154, E160, E164, E165), Amidation (R145, Y176, L190), Acetylation (K195, K200, K220, K224), ADP-ribosylation (R226).

PROSITE: No identified domain recognition sites.

### Structural modelling:

| Name                                                                                                       | Title                                | Identity | Method      | Oligo State | Ligands |
|------------------------------------------------------------------------------------------------------------|--------------------------------------|----------|-------------|-------------|---------|
|  <a href="#">3etz.1.A</a> | Adhesin A                            | 20.63    | X-ray, 2.0Å | monomer     | None    |
|  <a href="#">2dod.1.A</a> | Transcription elongation regulator 1 | 11.67    | NMR         | monomer     | None    |

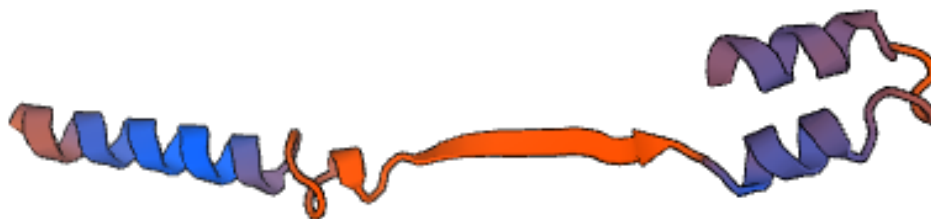

Model #1: Residues 104-169 of MVLG\_00385T0 with 3etz.1.A (20.63 % sequence identity) as a template

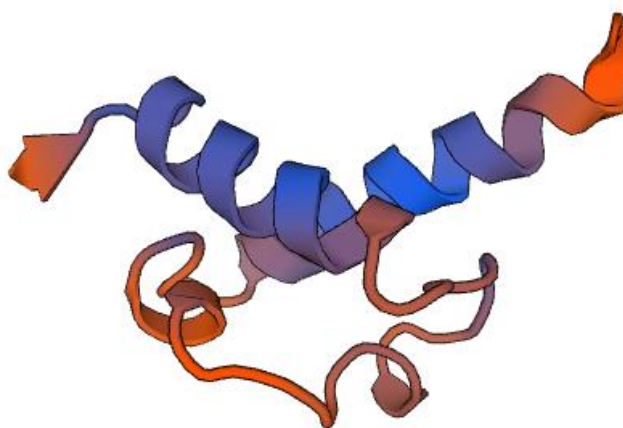

Model #2: Residues 107-168 of MVLG\_00385T0 with 2dod.1.A (11.67 % sequence identity) as a template

>MVLG\_06764T0 (80.27%)- 603 aa

**MKLIRSARGAFLGAIGLSCLAVRLVRA**QAGDEGNSYYADDTNSWIKFDGSWKEVVSDQFHQYTS  
 MLTSDKGATATFKFIGESFKILGISDQANFSVTVDGQDADVPSVSSDPDKTSALFSQTQLRPGTQHTV  
 ILEVISSGNLSFDAVVIGGGPASKAALCPVKGHQPCTSVNFQSIPKAHQSKPSTDRGGLFTTSLHAGI  
 KKLKRKPDPPSTPKDNSGDKSGNPLRHPKGAVGRKQKVDNTDKQDEKMGKDDVDQDGGKHQH  
 QNEGKGAPKDQPTNDSADKEYDPGMKIGKTSEHHSKEDPAGADTTKSEKAGLEGHELKPSKQNKP  
 DSPKTENPAPDDPKEPKETSAPHNQTDGAGGDSGLLEGLLGGA VGSSGSNEHESHGGDHREGDSA  
 SQTPKKSSLIPAIVKLVGSDGGHKPSKSKASSKPTDAGTLGNSSDPHKPSSSDHSTTLVGLSRPLGDG  
 TGEHHSNSKDSGIEQPEPKTLVDIKGGGDKHPDDPAADKPPPTPKKL VSIKGGPTDTGLQAGIDLPK  
 IVLPGSPATKLPDGGQDVLGKKNVTGPSKDPGGKDHDQDHPVVPVVIKFSDSHDDPGSVATVVTVSQE  
 PVPKP

PONDR:

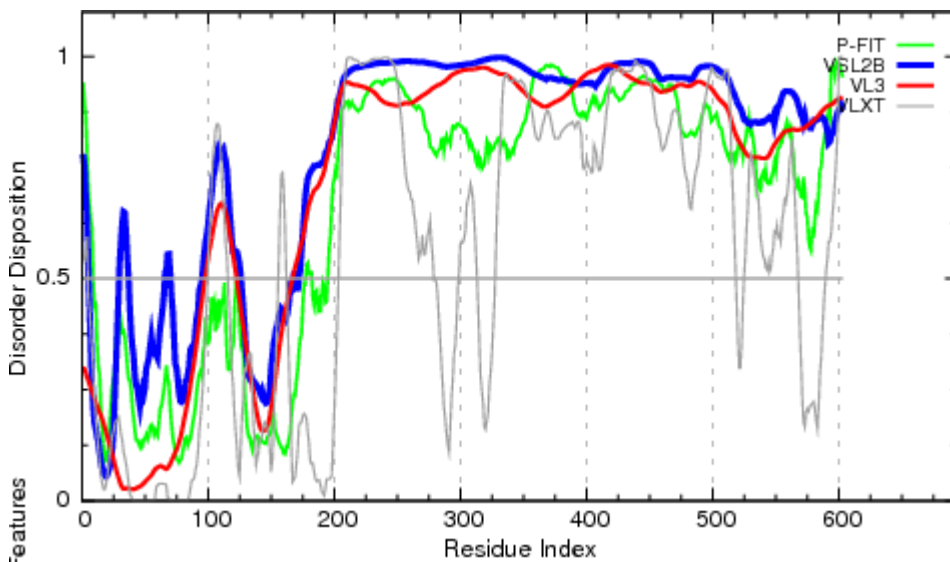

=====PONDR VSL2 STATISTICS=====

|                                        |                                  |
|----------------------------------------|----------------------------------|
| Predicted residues: 603                | Number Disordered Regions: 6     |
| Number residues disordered: 484        | Longest Disordered Region: 432   |
| Overall percent disordered: 80.27      | Average Prediction Score: 0.7831 |
| Predicted disorder segment [1]-[5]     | Average Strength= 0.6747         |
| Predicted disorder segment [30]-[37]   | Average Strength= 0.5884         |
| Predicted disorder segment [66]-[70]   | Average Strength= 0.5322         |
| Predicted disorder segment [96]-[126]  | Average Strength= 0.6613         |
| Predicted disorder segment [168]-[170] | Average Strength= 0.5116         |
| Predicted disorder segment [172]-[603] | Average Strength= 0.9337         |

## ANCHOR:

| Predicted Disordered Binding Regions |      |     |        |
|--------------------------------------|------|-----|--------|
|                                      | From | To  | Length |
| 1                                    | 141  | 149 | 9      |
| 2                                    | 156  | 165 | 10     |
| 3                                    | 168  | 176 | 9      |
| 4                                    | 189  | 207 | 19     |
| 5                                    | 223  | 242 | 20     |
| 6                                    | 249  | 271 | 23     |
| 7                                    | 278  | 326 | 49     |
| 8                                    | 350  | 420 | 71     |
| 9                                    | 424  | 440 | 17     |
| 10                                   | 446  | 464 | 19     |
| 11                                   | 471  | 494 | 24     |
| 12                                   | 507  | 555 | 49     |
| 13                                   | 568  | 597 | 30     |
| Filtered Regions                     |      |     |        |
|                                      | From | To  | Length |
| 1                                    | 134  | 138 | 5      |

## ModPred and PROSITE:

ModPred: Sumoylation (K2), Amidation (I79, K410, T591), Phosphorylation (T214, Y285, S331, T398, T507, S537), Proteolytic cleavage (K231, D253, D393, K410, D547), ADP-ribosylation (R458), Ubiquitination (K494), Hydroxylation (P505, P506).

PROSITE: PROKAR\_LIPOPROTEIN (Prokaryotic membrane lipoprotein lipid attachment site profile, 1-19, PROSITE entry PS51257). Signal (1-18), N-palmitoyl cysteine (19), S-diacylglycerol cysteine (19)

In prokaryotes, membrane lipoproteins are synthesized with a precursor signal peptide, which is cleaved by a specific lipoprotein signal peptidase (signal peptidase II). The peptidase recognizes a conserved sequence and cuts upstream of a cysteine residue to which a glyceride-fatty acid lipid is attached.

PROSITE: TONB\_DEPENDENT\_REC\_1 (TonB-dependent receptor proteins signature 1, 1-101, PROSITE entry PS00430)

In *Escherichia coli*, the tonB protein interacts with outer membrane receptor proteins that carry out high-affinity binding and energy-dependent uptake of specific substrates into the periplasmic space. These substrates are either poorly permeable through the porin channels or are encountered at very low concentrations. In the absence of tonB these receptors bind their substrates but do not carry out active transport. The tonB protein also interacts with some colicins.

## Structural modelling:

| Name                                                                                                       | Title                                           | Identity | Method      | Oligo State | Ligands                                                        |
|------------------------------------------------------------------------------------------------------------|-------------------------------------------------|----------|-------------|-------------|----------------------------------------------------------------|
|  <a href="#">2wab.1.A</a> | ENDOGLUCANASE E                                 | 24.04    | X-ray, 1.9Å | monomer     | None                                                           |
|  <a href="#">5x7o.1.A</a> | Glycoside hydrolase family 31 alpha-glucosidase | 14.63    | X-ray, 2.0Å | homo-dimer  | 2 x <u>NI</u> , 6 x <u>CA</u> , 9 x <u>MG</u> , 4 x <u>MES</u> |
|  <a href="#">1fv3.1.A</a> | TETANUS TOXIN HEAVY CHAIN                       | 16.25    | X-ray, 2.3Å | monomer     | None                                                           |
|  <a href="#">2vyu.1.A</a> | CHOLINE BINDING PROTEIN F                       | 24.59    | X-ray, 2.5Å | monomer     | None                                                           |
|  <a href="#">3ron.1.A</a> | Type-1Aa cytolytic delta-endotoxin              | 17.95    | X-ray, 2.2Å | monomer     | None                                                           |

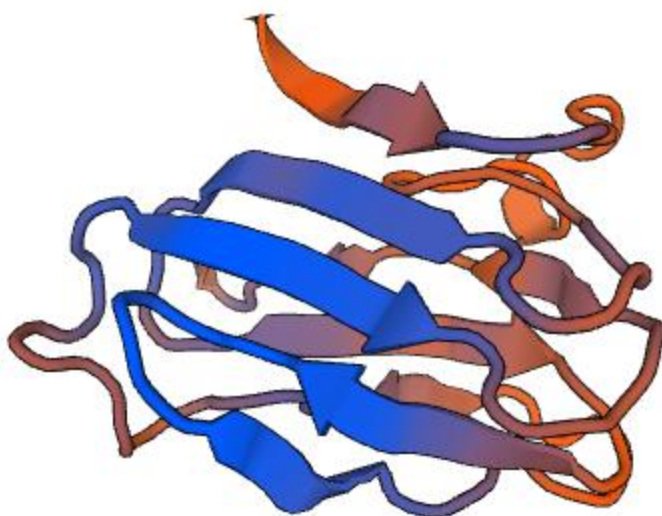

Model #1: Residues 42-152 of MVLG\_06764T0 with 2wab.1.A (24.04 % sequence identity) as a template

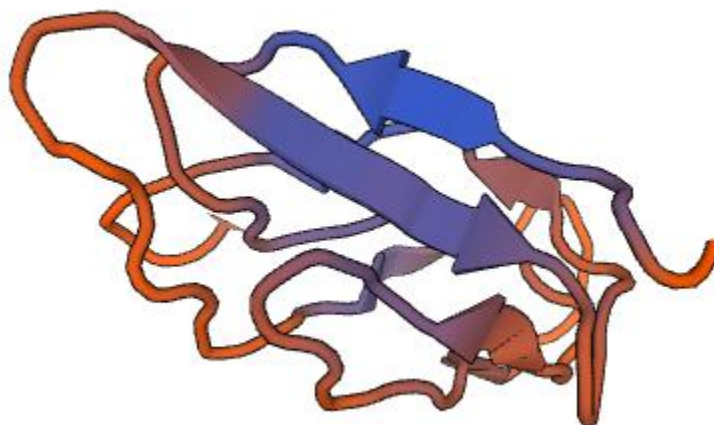

Model #2: Residues 69-154 of MVLG\_06764T0 with 5x7o.1.A (19.05 % sequence identity) as a template

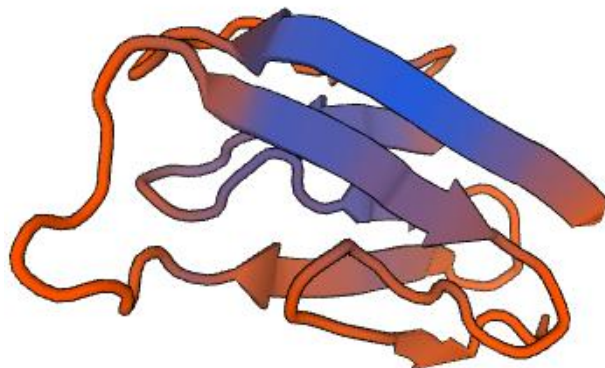

Model #3: Residues 71-151 of MVLG\_06764T0 with 1fv3.1.A (16.25 % sequence identity) as a template

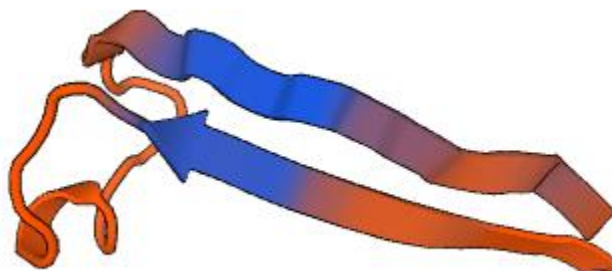

Model #4: Residues 65-103 of MVLG\_06764T0 with 3ron.1.A (17.95 % sequence identity) as a template

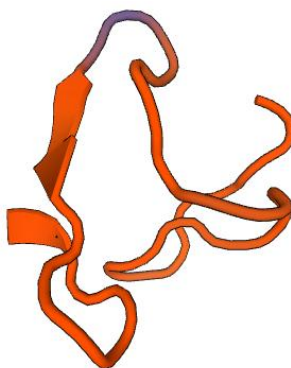

Model #5: Residues 29-61 of MVLG\_06764T0 with 2vyu.1.A (24.59 % sequence identity) as a template

>MVLG\_00398T0 (80.00%)- 205 aa

**MPSMRSLTSFAFSALVAVSSS**APT VSSMPSLIERHDSPLSPPSLPPPPSPSVKSSLPTFSPPPPTYENQT  
 MCINYYFEHLPEYKDLVDCTVYDATKSFYDARYYQKKAIEKLEEEAQCAKDQADFADRVNQFAQA  
 ELAYAAEQKRFEWASKKFEHEKASLETSSKAFQALINQKVLEASQAMEIKHTCEKVFSEHTNEYIPK  
 HSI

**PONDR:**

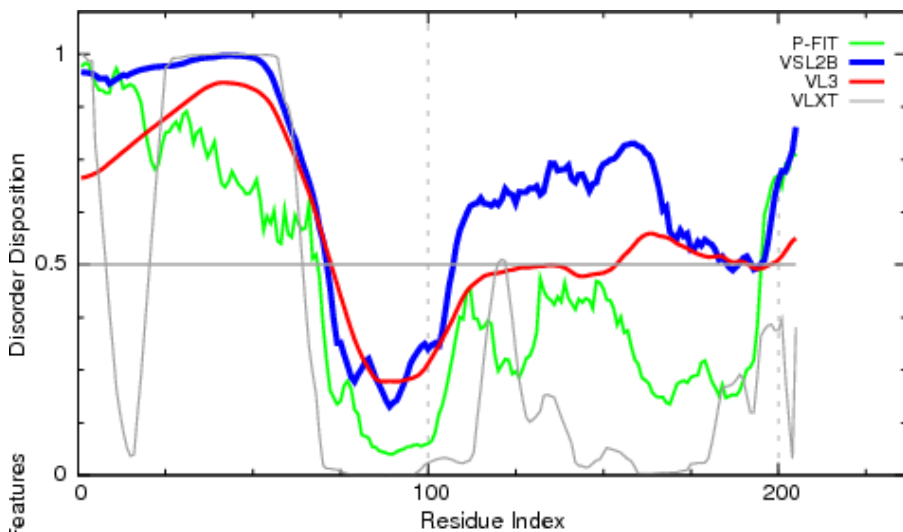

#### =====PONDR VSL2 STATISTICS=====

|                                        |                                  |
|----------------------------------------|----------------------------------|
| Predicted residues: 205                | Number Disordered Regions: 4     |
| Number residues disordered: 164        | Longest Disordered Region: 78    |
| Overall percent disordered: 80.00      | Average Prediction Score: 0.6783 |
| Predicted disorder segment [1]-[71]    | Average Strength= 0.9207         |
| Predicted disorder segment [108]-[185] | Average Strength= 0.6637         |
| Predicted disorder segment [189]-[192] | Average Strength= 0.5114         |
| Predicted disorder segment [195]-[205] | Average Strength= 0.6655         |

**ANCHOR:**

| Predicted Disordered Binding Regions |      |    |        |
|--------------------------------------|------|----|--------|
|                                      | From | To | Length |
| 1                                    | 7    | 18 | 12     |
| Filtered Regions                     |      |    |        |
|                                      | From | To | Length |
| 1                                    | 71   | 79 | 9      |
| 2                                    | 86   | 89 | 4      |

**ModPred and PROSITE:**

ModPred: Phosphorylation (S37, S40, S49), Hydroxylation (P47), O-linked glycosylation (T58), Amidation (Y199).

PROSITE: No identified domain recognition sites.

## Structural modelling:

| Name                                                                                                                                                                         | Title | Identity | Method      | Oligo State     | Ligands |
|------------------------------------------------------------------------------------------------------------------------------------------------------------------------------|-------|----------|-------------|-----------------|---------|
|  <a href="#">2ap3.1.A</a> conserved hypothetical protein                                    |       | 20.00    | X-ray, 1.6Å | monomer         | None    |
|  <a href="#">4bne.1.A</a> PROTEIN KINASE C AND CASEIN KINASE SUBSTRATE IN NEURONS PROTEIN 2 |       | 18.33    | X-ray, 2.6Å | homo-dimer      | None    |
|  <a href="#">5cx2.1.B</a> Coronin                                                           |       | 26.83    | X-ray, 2.2Å | hetero-oligomer | None    |

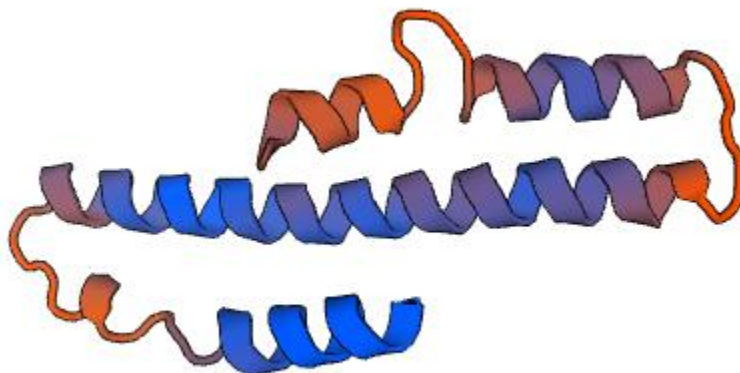

Model #1: Residues 106-199 of MVLG\_00398T0 with 2ap3.1.A (19.78 % sequence identity) as a template

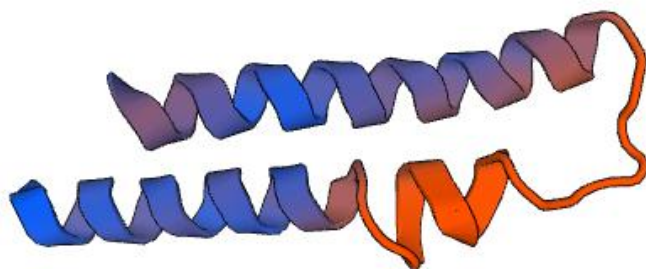

Model #2: Residues 125-187 of MVLG\_00398T0 with 4bne.1.A (20.00 % sequence identity) as a template

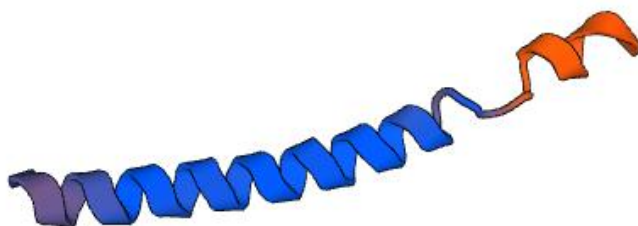

Model #3: Residues 142-182 of MVLG\_00398T0 with 5cx2.1.B (26.83 % sequence identity) as a template

> MVLG\_04106T0 (79.44%)- 107aa

**MKYSLVFVALVVIATRIVSALA**ADATKQASTSEVDYPYPFEEHAATVSQGPTRPITHPVASTLNES  
LVNCKAEKCTTCKGEARGTCIEQCASWMAHQASQPEPEGC

## PONDR:

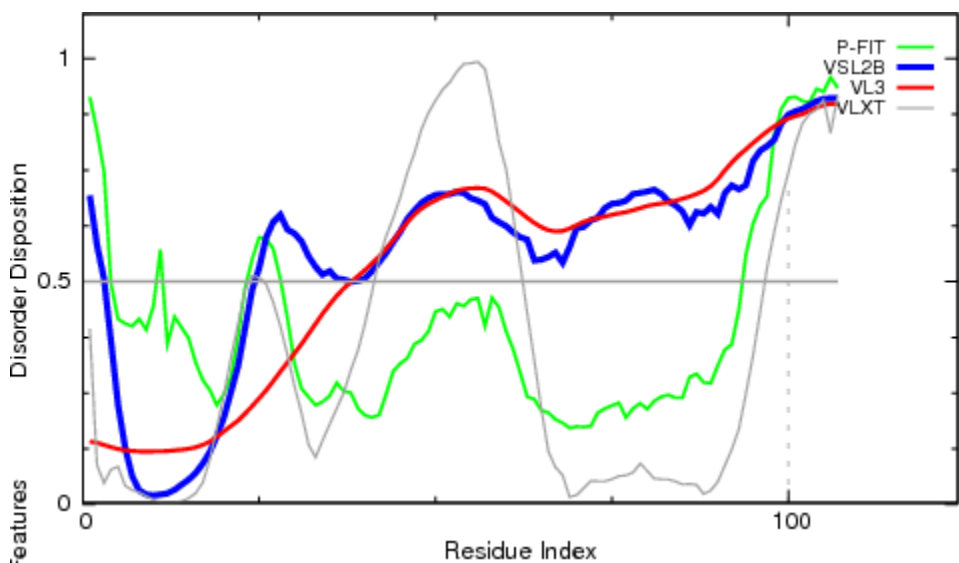

=====PONDR VSL2 STATISTICS=====

|                                       |                                  |
|---------------------------------------|----------------------------------|
| Predicted residues: 107               | Number Disordered Regions: 3     |
| Number residues disordered: 85        | Longest Disordered Region: 69    |
| Overall percent disordered: 79.44     | Average Prediction Score: 0.5594 |
| Predicted disorder segment [1]-[3]    | Average Strength= 0.5938         |
| Predicted disorder segment [25]-[37]  | Average Strength= 0.5667         |
| Predicted disorder segment [39]-[107] | Average Strength= 0.6827         |

## ANCHOR:

| Predicted Disordered Binding Regions |      |    |        |
|--------------------------------------|------|----|--------|
|                                      | From | To | Length |
| None                                 |      |    |        |
| Filtered Regions                     |      |    |        |
|                                      | From | To | Length |
| 1                                    | 3    | 14 | 12     |

## ModPred and PROSITE:

ModPred: Post translational modification sites include proteolytic cleavage (D35), sulfation (Y36), Amidation (S48).

No identified domain recognition sites (PROSITE)

## Structural modelling:

| Name                                                                                                       | Title                | Identity | Method      | Oligo State | Ligands        |
|------------------------------------------------------------------------------------------------------------|----------------------|----------|-------------|-------------|----------------|
|  <a href="#">1csm.1.A</a> | CHORISMATE<br>MUTASE | 22.22    | X-ray, 2.2Å | homo-dimer  | 2 x <u>TRP</u> |

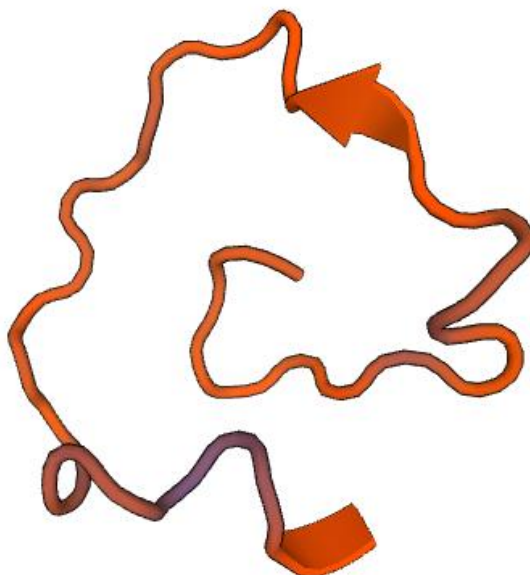

Model: Residues 30-65 of MVLG\_04106T0 with 1csm.1.A (22.22% sequence identity) as a template

> MVLG\_05720T0 (64.34%)- 129aa

**MMRSLIKLLVLFTA****VSVALA**NPWPSPVQDSCNWLKAWCTDCQTSFCGNITSHKQHKLCFKTHCES  
HHPRDYPRPCKQMQMADKCMRSCQWKRSHNLTLSWNPFINHDKCRHCCDMQGGPTEKRMRRSG  
Y

#### PONDR:

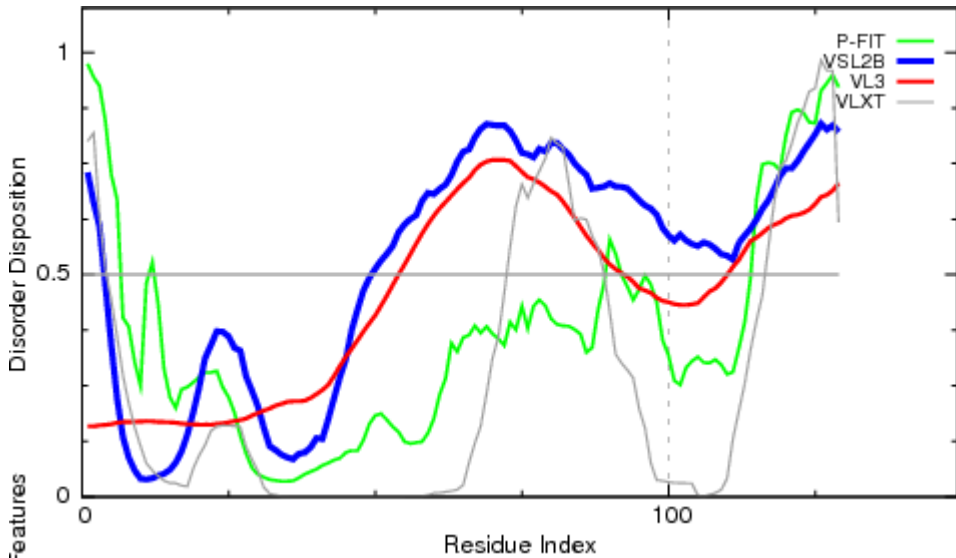

#### =====PONDR VSL2 STATISTICS=====

|                                       |                                  |
|---------------------------------------|----------------------------------|
| Predicted residues: 129               | Number Disordered Regions: 2     |
| Number residues disordered: 83        | Longest Disordered Region: 80    |
| Overall percent disordered: 64.34     | Average Prediction Score: 0.5194 |
| Predicted disorder segment [1]-[3]    | Average Strength= 0.6671         |
| Predicted disorder segment [50]-[129] | Average Strength= 0.6944         |

#### ANCHOR:

| Predicted Disordered Binding Regions |      |    |        |
|--------------------------------------|------|----|--------|
|                                      | From | To | Length |
| None                                 |      |    |        |
| Filtered Regions                     |      |    |        |
|                                      | From | To | Length |
| 1                                    | 7    | 12 | 6      |

#### ModPred and PROSITE:

ModPred: SUMOylation (k7), Amidation (A14), Hydroxylation (P119), Proteolytic cleavage (R123, R126, S127)

PROSITE: No identified domain recognition sites.

#### Structural modelling:

No templates were found matching target sequence

> MVLG\_06175T0 (61.02%)- 118aa

**MWTSSIVQAALLFAVIVLYSSPVVAWA**FCPFGKTAEHMAICSSLCRMRCYDPNSGTSNSTCRNAC  
TGQYHVSRSLNAADQCMQQCDRFTKDKKKQGEGKLEHKRCLHKCTDWFFPLNL

# PONDR:

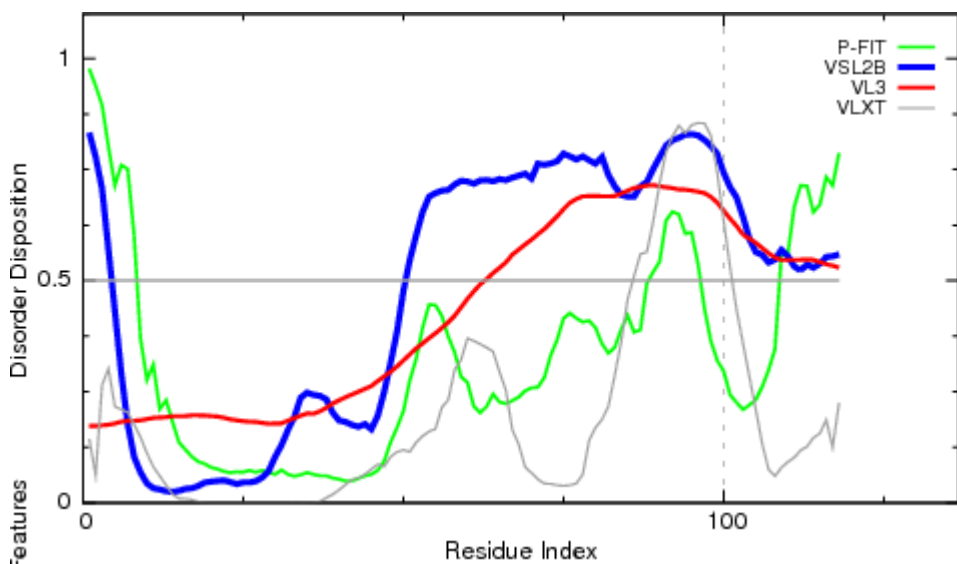

## =====PONDR VSL2 STATISTICS=====

|                                       |                                  |
|---------------------------------------|----------------------------------|
| Predicted residues: 118               | Number Disordered Regions: 2     |
| Number residues disordered: 72        | Longest Disordered Region: 68    |
| Overall percent disordered: 61.02     | Average Prediction Score: 0.4819 |
| Predicted disorder segment [1]-[4]    | Average Strength= 0.7216         |
| Predicted disorder segment [51]-[118] | Average Strength= 0.6969         |

# ANCHOR:

| Predicted Disordered Binding Regions |      |     |        |
|--------------------------------------|------|-----|--------|
|                                      | From | To  | Length |
| None                                 |      |     |        |
| Filtered Regions                     |      |     |        |
|                                      | From | To  | Length |
| 1                                    | 113  | 118 | 6      |

# ModPred and PROSITE:

ModPred: Amidation (A10, S59, Y69), GPI anchor amidation (N53).

No identified domain recognition sites (PROSITE)

## Structural modelling:

| Name                                                                                                       | Title                                   | Identity | Method      | Oligo State   | Ligands                                           |
|------------------------------------------------------------------------------------------------------------|-----------------------------------------|----------|-------------|---------------|---------------------------------------------------|
|  <a href="#">2v79.1.B</a> | DNA REPLICATION PROTEIN DNAD            | 20.59    | X-ray, 2.0Å | homo-tetramer | 6 x <a href="#">NA</a> , 22 x <a href="#">CL</a>  |
|  <a href="#">2ahx.1.A</a> | Receptor tyrosine-protein kinase erbB-4 | 27.08    | X-ray, 2.4Å | monomer       | 5 x <a href="#">NAG</a> , 3 x <a href="#">NDG</a> |

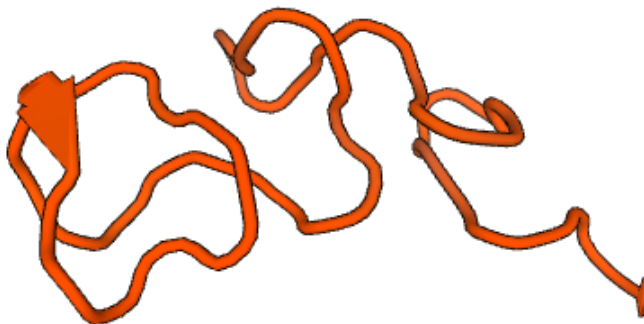

Model #1: Residues 40-87 of MVLG\_06175T0 with 2ahx.1.A (27.08% sequence identity) as a template

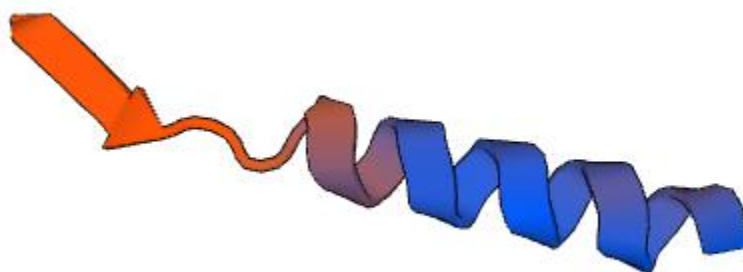

Model #2: Residues 66-88 of MVLG\_06175T0 with 2v79.1.B (20.59% sequence identity) as a template

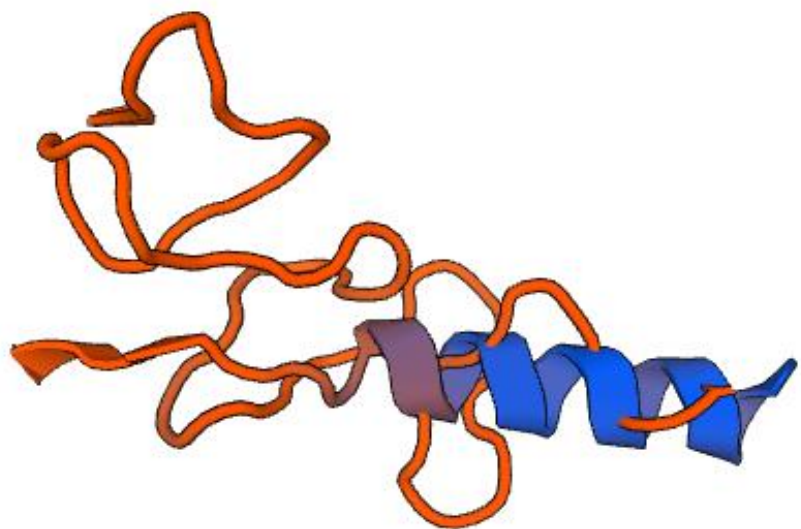

Overlap of models 1 and 2 for MVLG\_06175T0

# > MVLG\_01591T0 (59.82%)- 448 aa

**MRS**LQLLSVL**VTCLPAAFA**EIIDNTDAKKVITESGADISGNYTIQNAEGDYM~~HF~~QRDGTPGNSHV  
SLSFVPQYSTVEVVSRTIYGASGRMHGRFTGVSLSGANKCAATQFNSNEGRDYDVVAYGCTFN  
HTGAKMIFNVLP CGNTEDALSLAQKIRGVSKKEDFKFKKANPKSSPSRKSSGKSGAHRNTPHRPQSD  
LSSSGQPGRHHVGGYRGKRHSGHGRRRGHGGHGGHGHEGGNHHGGGGHGHKGGNHHGGGGHGH  
KGGNHHGGGGHPQH~~HH~~VRS~~LT~~GN~~SL~~ACQRRRH~~YL~~AKRDSRSQMLVSPQGPSPQGPSPQGPVSPSG  
TPKQSASGASGGAGSAAGDHGPGPQSTAKKTQDGAVSQQASKDPNPASEADKSNSEIADHLRKNL  
MSGKAQTV~~CIV~~GQDHLSDMQTAGLTGKETVGAGGVPGLMYDLFDASND~~AF~~WLTMT~~RVN~~

## PONDR:

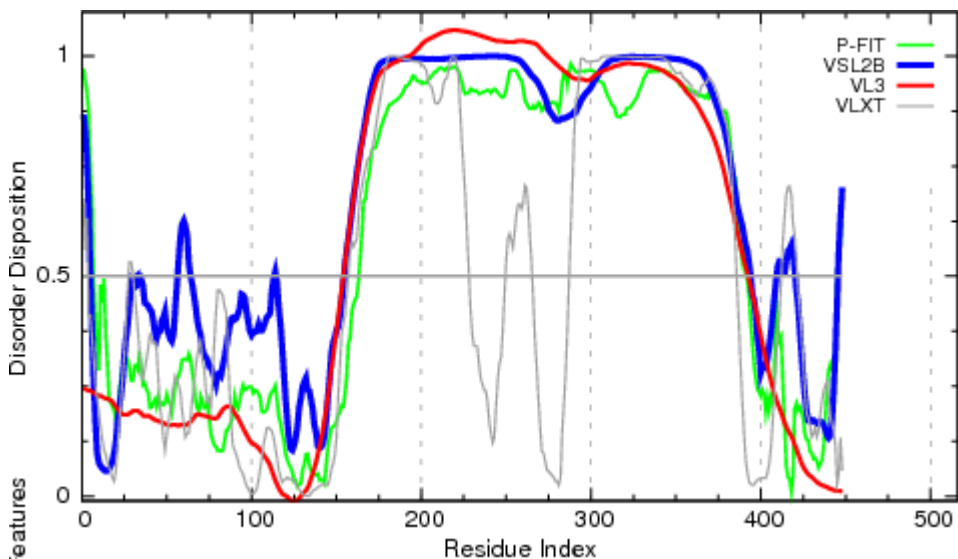

## PONDR VSL2 STATISTICS

|                                        |                                  |
|----------------------------------------|----------------------------------|
| Predicted residues: 448                | Number Disordered Regions: 7     |
| Number residues disordered: 268        | Longest Disordered Region: 240   |
| Overall percent disordered: 59.82      | Average Prediction Score: 0.6601 |
| Predicted disorder segment [1]-[5]     | Average Strength= 0.7239         |
| Predicted disorder segment [33]-[33]   | Average Strength= 0.5020         |
| Predicted disorder segment [57]-[63]   | Average Strength= 0.5857         |
| Predicted disorder segment [114]-[114] | Average Strength= 0.5102         |
| Predicted disorder segment [155]-[394] | Average Strength= 0.9325         |
| Predicted disorder segment [410]-[420] | Average Strength= 0.5355         |
| Predicted disorder segment [446]-[448] | Average Strength= 0.6314         |

## ANCHOR:

| Predicted Disordered Binding Regions |      |     |        |
|--------------------------------------|------|-----|--------|
|                                      | From | To  | Length |
| 1                                    | 136  | 144 | 9      |
| 2                                    | 151  | 174 | 24     |
| 3                                    | 181  | 311 | 131    |
| 4                                    | 318  | 349 | 32     |
| 5                                    | 352  | 367 | 16     |
| 6                                    | 378  | 407 | 30     |

|                  |      |     |        |
|------------------|------|-----|--------|
| 7                | 426  | 441 | 16     |
| Filtered Regions |      |     |        |
|                  | From | To  | Length |
| 1                | 122  | 126 | 5      |

### ModPred and PROSITE:

ModPred: Amidation (M53, G59, N104, R290, K354, M429, T445), Proteolytic cleavage (Y119, D120, K180, K184, R189, Q302, M303), Acetylation (K162, K216), Sumoylation (K167), Phosphorylation (S176, S322), Methylation (R225).

PROSITE: No identified domain recognition sites.

### Structural modelling:

| Name                                                                                                                                                             | Title | Identity | Method      | Oligo State | Ligands |
|------------------------------------------------------------------------------------------------------------------------------------------------------------------|-------|----------|-------------|-------------|---------|
|  <a href="#">4y3k.1.A</a> Serpin A12                                              |       | 17.14    | X-ray, 2.2Å | monomer     | None    |
|  <a href="#">4k07.1.A</a> Amyloidogenic immunoglobulin light chain protein AL-103 |       | 5.71     | X-ray, 2.8Å | homo-dimer  | None    |

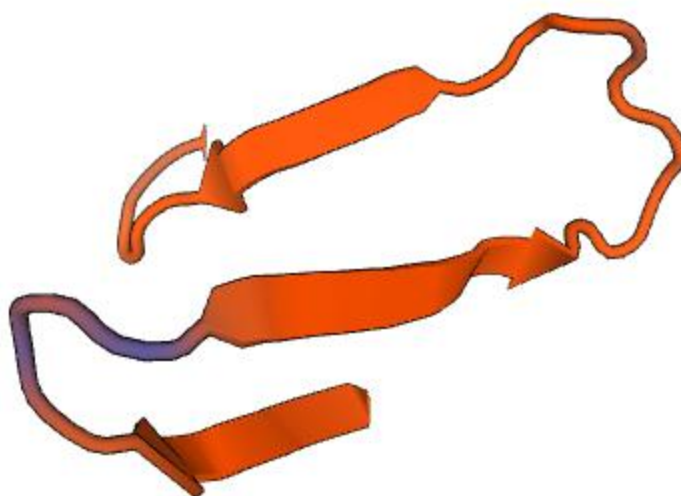

Model #1: Residues 29-63 of MVLG\_01591T0 with 4k07.1.A (5.71% sequence identity) as a template

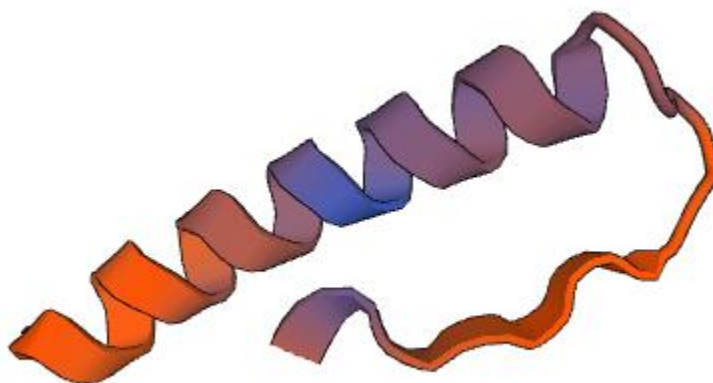

Model #2: Residues 274-308 of MVLG\_01591T0 with 4y3k.1.A (17.14% sequence identity) as a template

# > MVLG\_04168T0 (58.93%)- 319 aa

**MHLVTVLPFALVAFLGSTGVQA**LIKTNATLEALYLVEYDTKAYGTPETGAVKHFGTNNFHQACV  
AAAIQKIPIMHCRVADIPFNPLIIPQDGTWDNHGPVTDLMDLAMNNTLFLGNARIVSGPDGKPYAPA  
YPPPTKPTPETRDADAASHVPDSTGLVPGTTLPGPSTIPGPGTTPPGPGTTLPGPSTIPGPGTTPPGPGT  
TLPGPSTIPGPGTTPPGPGTTLPGPSTIPGPGTTPPGPGTTLPGPGPTLVPVSRPTTPLTGGHGRK  
GRKHRNGRKGGFKRVQVTVDDTVDDFLMNGQVQPPDSVDTLLGGIAF

## PONDR:

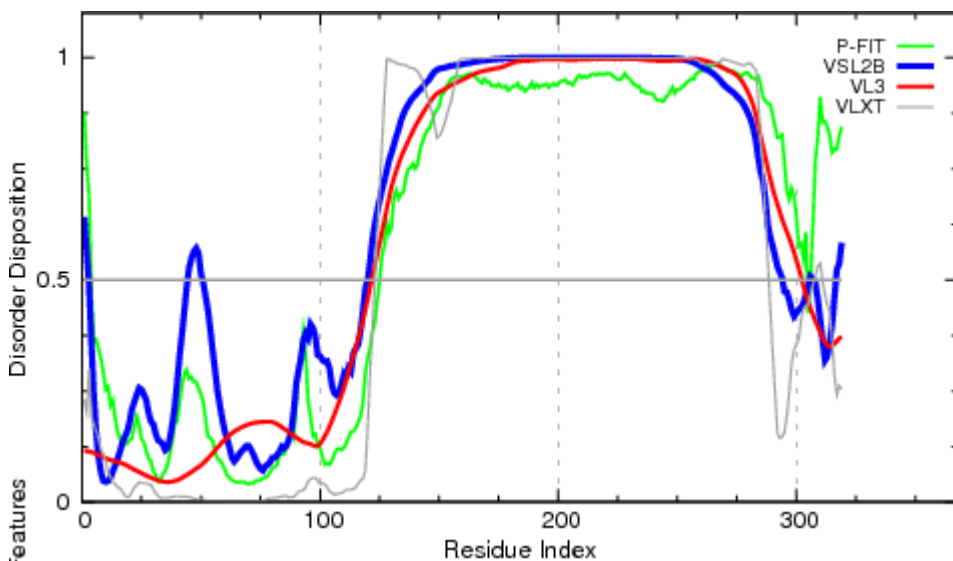

## -----PONDR VSL2 STATISTICS-----

|                                        |                                  |
|----------------------------------------|----------------------------------|
| Predicted residues: 319                | Number Disordered Regions: 5     |
| Number residues disordered: 188        | Longest Disordered Region: 175   |
| Overall percent disordered: 58.93      | Average Prediction Score: 0.6365 |
| Predicted disorder segment [1]-[2]     | Average Strength= 0.6015         |
| Predicted disorder segment [45]-[50]   | Average Strength= 0.5467         |
| Predicted disorder segment [120]-[294] | Average Strength= 0.9317         |
| Predicted disorder segment [306]-[307] | Average Strength= 0.5051         |
| Predicted disorder segment [317]-[319] | Average Strength= 0.5479         |

## ANCHOR:

| Predicted Disordered Binding Regions |      |     |        |
|--------------------------------------|------|-----|--------|
|                                      | From | To  | Length |
| 1                                    | 105  | 121 | 17     |
| 2                                    | 144  | 171 | 28     |
| 3                                    | 180  | 193 | 14     |
| 4                                    | 198  | 238 | 41     |
| 5                                    | 246  | 273 | 28     |
| 6                                    | 277  | 306 | 30     |
| 7                                    | 309  | 319 | 11     |

### ModPred and PROSITE:

ModPred: Proteolytic cleavage (R118, S121, R143, G156, R277, R280, K281, K285, R286, D311), Hydroxylation (P133, P134, P135, P237, P244), Amidation (P134, P204, P257), Phosphorylation (T139, T175, T195, T240, T263), O-linked glycosylation (S167, S187, S207, T215), ADP-ribosylation (R260).

PROSITE: No identified domain recognition sites.

### Structural modelling:

| Name                                                                                                       | Title                             | Identity | Method      | Oligo State | Ligands |
|------------------------------------------------------------------------------------------------------------|-----------------------------------|----------|-------------|-------------|---------|
|  <a href="#">1z5z.2.A</a> | Helicase of the snf2/rad54 family | 11.11    | X-ray, 2.0Å | monomer     | None    |

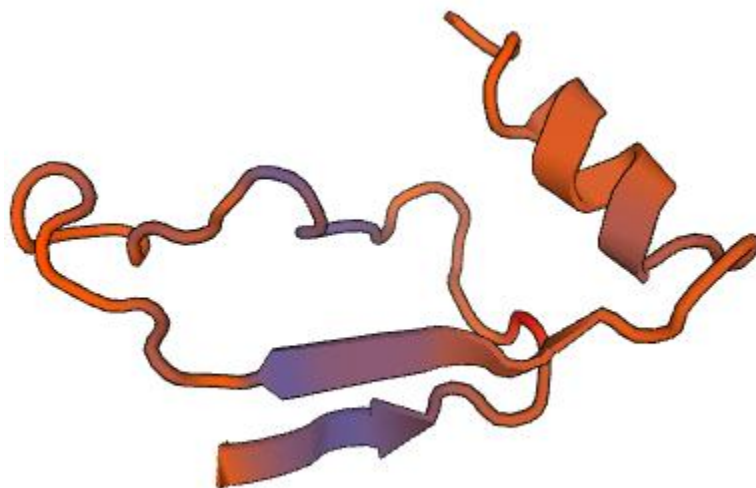

Model: Residues 253-307 of MVLG\_04168T0 with 1z5z.2.A (11.11% sequence identity) as a template

> MVLG\_02288T0 (55.25%)- 324 aa

**MRFLTSQITLCLLVLTSTLA**FHVANLFPDLSVDAHRTVPSSNRRHHRCLAHSVRHNHHKKCRHS  
 RKTGLKHFDQEKSATHGHLAHRNRRKKPAIKRLGKKRPVSHVDPNHKRPEHDQSNPPTILTGPTL  
 QQPEPSGVHVSKTPAGKTAPERQIPDGKDQVSEIQALALEEINAFRALHNAPPLQTSPELVQNAV  
 VVWTSKCHYGHTRGAFTGEYGEIARTSGSWGNNMSKAIELWTVDEENDFNPRKPQTTHFTQAVW  
 KSSRLGCASSDKCNDPADNSTTVTGDDIPPDEHNSVLYICRFLPAGNLNDKDVDIIMLKGFAD

**PONDR:**

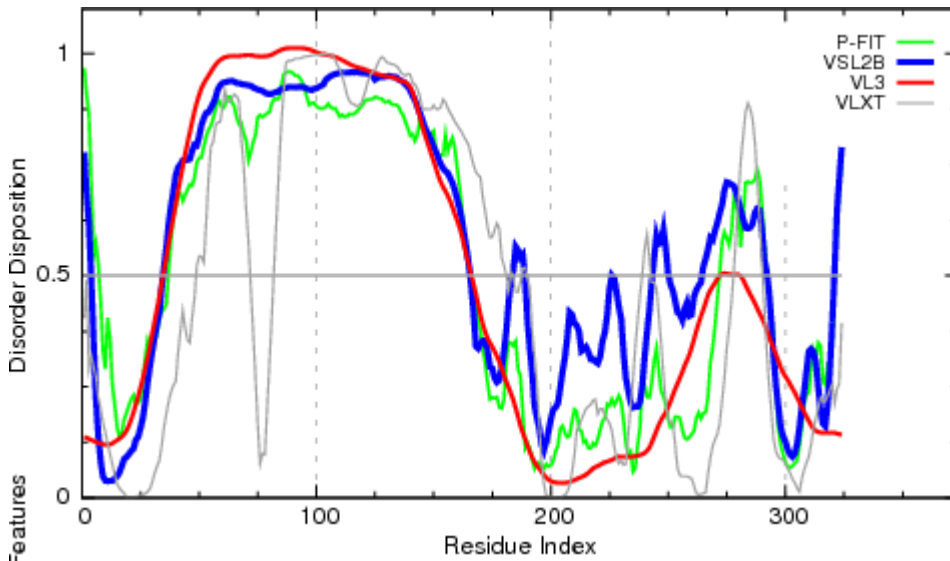

=====PONDR VSL2 STATISTICS=====

|                                        |                                  |
|----------------------------------------|----------------------------------|
| Predicted residues: 324                | Number Disordered Regions: 7     |
| Number residues disordered: 179        | Longest Disordered Region: 131   |
| Overall percent disordered: 55.25      | Average Prediction Score: 0.5690 |
| Predicted disorder segment [1]-[3]     | Average Strength= 0.6941         |
| Predicted disorder segment [35]-[165]  | Average Strength= 0.8695         |
| Predicted disorder segment [184]-[188] | Average Strength= 0.5446         |
| Predicted disorder segment [226]-[226] | Average Strength= 0.5008         |
| Predicted disorder segment [244]-[250] | Average Strength= 0.5636         |
| Predicted disorder segment [265]-[292] | Average Strength= 0.6244         |
| Predicted disorder segment [321]-[324] | Average Strength= 0.6675         |

**ANCHOR:**

| Predicted Disordered Binding Regions |      |     |        |
|--------------------------------------|------|-----|--------|
|                                      | From | To  | Length |
| 1                                    | 46   | 112 | 67     |
| 2                                    | 122  | 147 | 26     |
| 3                                    | 161  | 180 | 20     |
| 4                                    | 192  | 205 | 14     |
| 5                                    | 232  | 237 | 6      |
| 6                                    | 259  | 268 | 10     |
| 7                                    | 297  | 305 | 9      |

| Filtered Regions |      |     |        |
|------------------|------|-----|--------|
|                  | From | To  | Length |
| 1                | 10   | 27  | 18     |
| 2                | 218  | 218 | 1      |
| 3                | 318  | 319 | 2      |

### ModPred and PROSITE:

ModPred: Amidation (A21), Proteolytic cleavage (D34, H36, R37, H52, R88, R98), Acetylation (K71, K97).

PROSITE: No identified domain recognition sites.

### Structural modelling:

| Name                                                                                                                                                 | Title | Identity | Method      | Oligo State     | Ligands                                                                                                                                 |
|------------------------------------------------------------------------------------------------------------------------------------------------------|-------|----------|-------------|-----------------|-----------------------------------------------------------------------------------------------------------------------------------------|
|  <a href="#">5jys.1.A</a> Protein PRY1                              |       | 25.81    | X-ray, 1.9Å | monomer         | 1 x <u>MG</u>                                                                                                                           |
|  <a href="#">2giz.1.A</a> Natrin-1                                  |       | 26.62    | X-ray, 1.7Å | monomer         | None                                                                                                                                    |
|  <a href="#">4kt0.1.I</a> Photosystem I reaction center subunit XII |       | 30.77    | X-ray, 2.8Å | hetero-oligomer | 4 x <u>LHG</u> , 3 x <u>SF4</u> , 90 x <u>CLA</u> , 2 x <u>PQN</u> , 2 x <u>LMU</u> , 2 x <u>CLQ</u> , 17 x <u>BCR</u> , 1 x <u>LMG</u> |

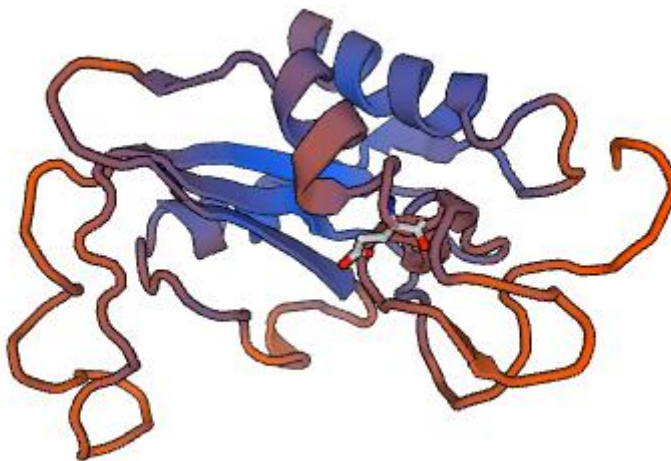

Model #1: Residues 163-321 of MVLG\_02288T0 with 2giz.1.A (26.62% sequence identity) as a template

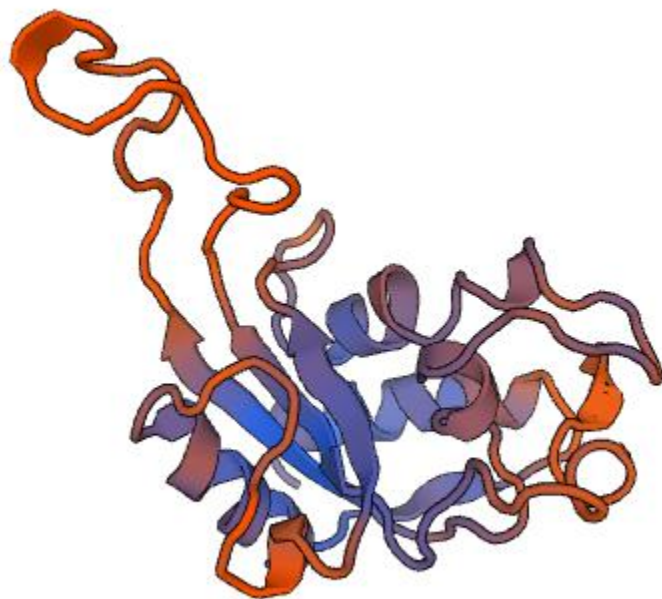

Model #2: Residues 162-320 of MVLG\_02288T0 with 5jys.1.A (25.81% sequence identity) as a template

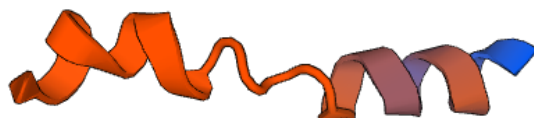

Model #3: Residues 3-26 of MVLG\_02288T0 with 4kt0.1.I (30.77% sequence identity) as a template

> MVLG\_00566T0 (55.00%)- 80 aa  
MRTCSIVFALGTLTSLTQVVVAAPKAADSTDFTKGMSCNSCVKTCNQKHLATGSADMEAGTS  
LVDCMDSCISVYNCES

PONDR:

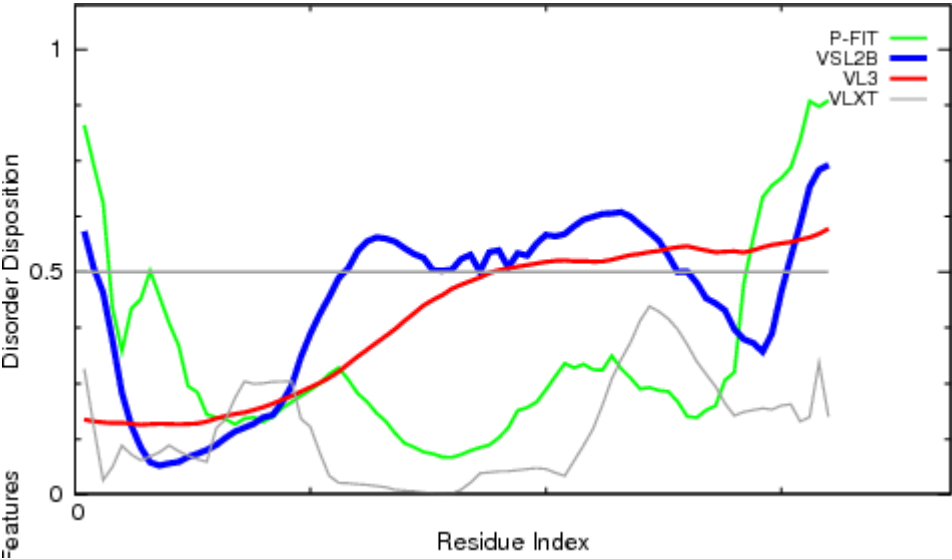

| -----PONDR VSL2 STATISTICS-----      |                                  |  |  |
|--------------------------------------|----------------------------------|--|--|
| Predicted residues: 80               | Number Disordered Regions: 3     |  |  |
| Number residues disordered: 44       | Longest Disordered Region: 37    |  |  |
| Overall percent disordered: 55.00    | Average Prediction Score: 0.4306 |  |  |
| Predicted disorder segment [1]-[2]   | Average Strength= 0.5504         |  |  |
| Predicted disorder segment [29]-[65] | Average Strength= 0.5601         |  |  |
| Predicted disorder segment [76]-[80] | Average Strength= 0.6607         |  |  |

ANCHOR:

| Predicted Disordered Binding Regions |      |    |        |
|--------------------------------------|------|----|--------|
|                                      | From | To | Length |
| None                                 |      |    |        |

ModPred and PROSITE:

ModPred: Proteolytic cleavage (D33), Carboxylation (E79).

PROSITE: No identified domain recognition sites.

## Structural modelling:

| Name                                                                                                       | Title                    | Identity | Method      | Oligo State | Ligands                                           |
|------------------------------------------------------------------------------------------------------------|--------------------------|----------|-------------|-------------|---------------------------------------------------|
|  <a href="#">5d6s.1.A</a> | Epoxyqueuosine reductase | 15.15    | X-ray, 2.6Å | monomer     | 2 x <a href="#">SF4</a> , 1 x <a href="#">B12</a> |

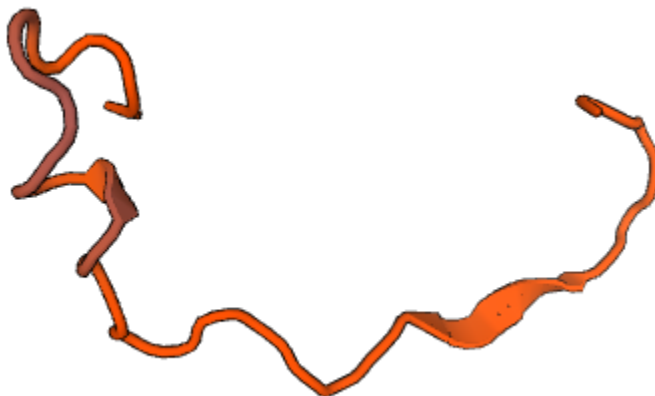

Model: Residues 21-53 of MVLG\_00566T0 with 5d6s.1.A (15.15% sequence identity) as a template

## Highly disordered proteins (30-50% disordered residues by PONDR® VSL2 analysis)

> MVLG\_05122T0 (43.93%)- 173 aa

**MLFKVSAALVLAGLSLGASA**LPSMSTESRAQPSPSSNKSPYGRGTGYIDSPADRKTTTYKVGDKIHF  
VYTSAPATYFVDVSLMLANGSQSFQLANRLTGSSMISNDANARAYFRMPENLKTIAATELLAASQDE  
HSGAMKNNNCILAYLIAKETQNGQYGLVGNLETKQAIAISM

### PONDR:

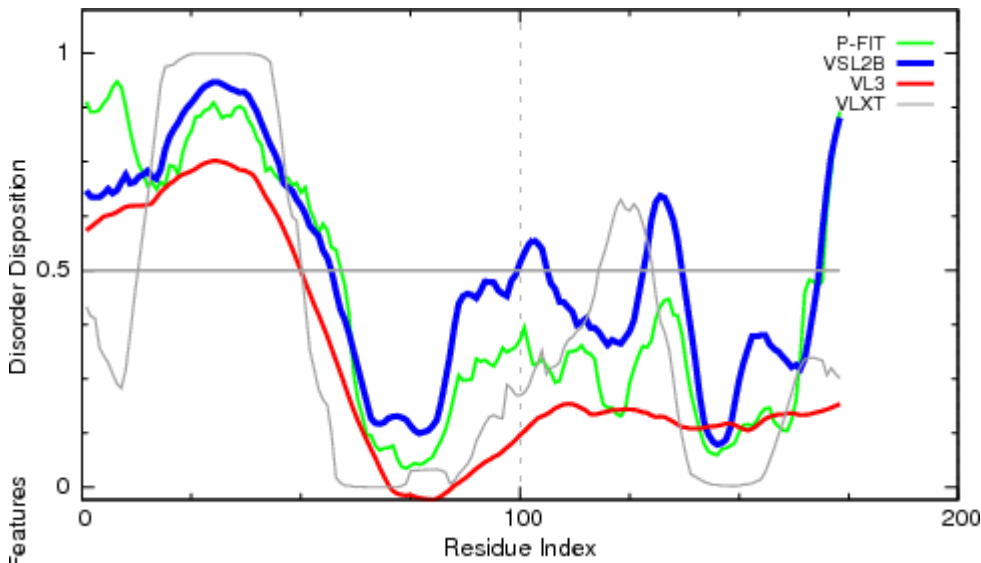

#### =====PONDR VSL2 STATISTICS=====

|                                        |                                  |
|----------------------------------------|----------------------------------|
| Predicted residues: 173                | Number Disordered Regions: 4     |
| Number residues disordered: 76         | Longest Disordered Region: 56    |
| Overall percent disordered: 43.93      | Average Prediction Score: 0.4965 |
| Predicted disorder segment [1]-[56]    | Average Strength= 0.7669         |
| Predicted disorder segment [100]-[106] | Average Strength= 0.5439         |
| Predicted disorder segment [129]-[136] | Average Strength= 0.6229         |
| Predicted disorder segment [169]-[173] | Average Strength= 0.7406         |

### ANCHOR:

| Predicted Disordered Binding Regions |      |     |        |
|--------------------------------------|------|-----|--------|
|                                      | From | To  | Length |
| 1                                    | 142  | 147 | 6      |

| Filtered Regions |      |    |        |
|------------------|------|----|--------|
|                  | From | To | Length |
| 1                | 1    | 16 | 16     |
| 2                | 75   | 81 | 7      |

### ModPred and PROSITE:

ModPred: Proteolytic cleavage (E27), Phosphorylation (S49), GPI anchor amidation (N104), Amidation (Y157).

PROSITE: No identified domain recognition sites.

## Structural modelling:

| Name                                                                                                       | Title                               | Identity | Method | Oligo State | Ligands |
|------------------------------------------------------------------------------------------------------------|-------------------------------------|----------|--------|-------------|---------|
|  <a href="#">2o2o.1.A</a> | SH3-domain kinase-binding protein 1 | 15.91    | NMR    | monomer     | None    |

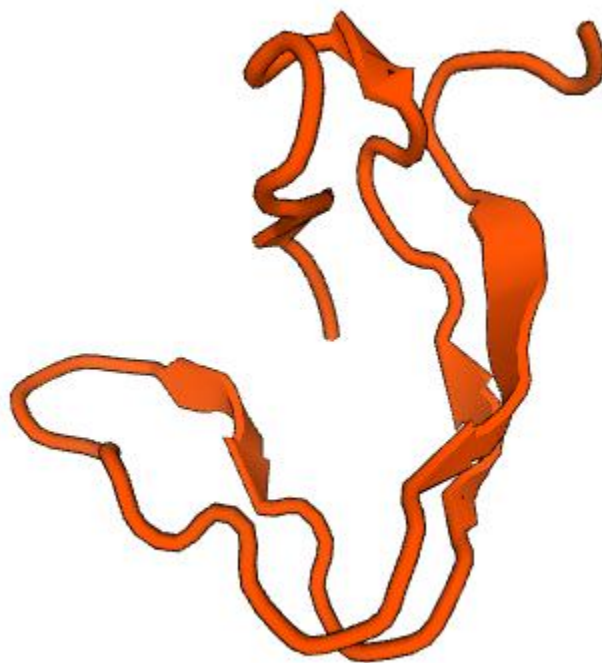

Model: Residues 35-78 of MVLG\_05122T0 with 2o2o.1A (15.91 % sequence identity) as a template

> MVLG\_03398T0 (43.07%)- 202 aa

**MLTLPLLVASLGFSVVG**SRHKNQDAHQVQGSGKEPLIDADKMYLIRVNPQITGLQSACTFLS  
DRCEKYVKRGPNVKQLDVSCSSAGQAVTSTSPYLWASCFETGTNEKDGRARDVSFNAFAGSDHAI  
VFLRGDEVFREVEIDEDLLKTESKKWKPTVNHQPQNRSPRQAGHRQINHETTGPKTHSGHNGDRPK  
RHKQET

#### PONDR:

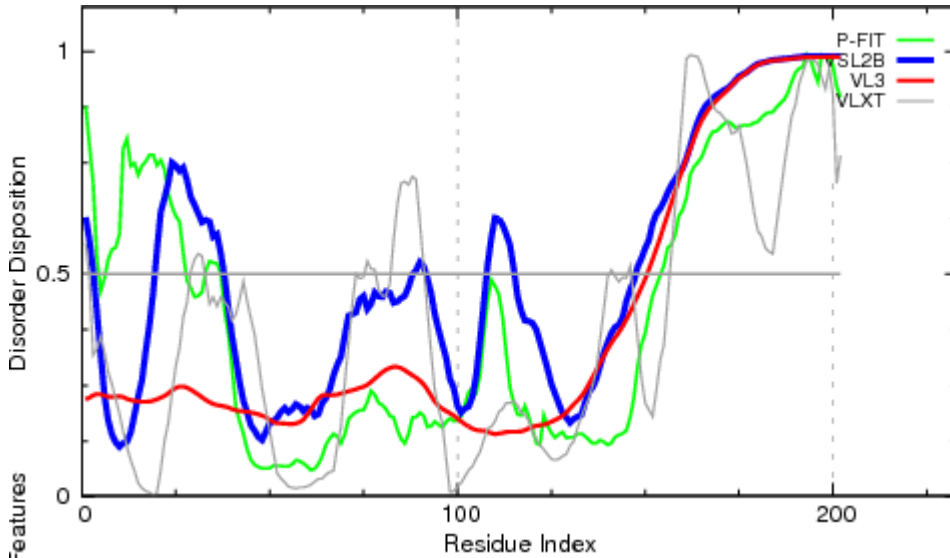

#### =====PONDR VSL2 STATISTICS=====

|                                        |                                  |
|----------------------------------------|----------------------------------|
| Predicted residues: 202                | Number Disordered Regions: 5     |
| Number residues disordered: 87         | Longest Disordered Region: 55    |
| Overall percent disordered: 43.07      | Average Prediction Score: 0.5044 |
| Predicted disorder segment [1]-[3]     | Average Strength= 0.5705         |
| Predicted disorder segment [20]-[37]   | Average Strength= 0.6548         |
| Predicted disorder segment [89]-[91]   | Average Strength= 0.5176         |
| Predicted disorder segment [108]-[115] | Average Strength= 0.5787         |
| Predicted disorder segment [148]-[202] | Average Strength= 0.8722         |

#### ANCHOR:

| Predicted Disordered Binding Regions |      |     |        |
|--------------------------------------|------|-----|--------|
|                                      | From | To  | Length |
| 1                                    | 98   | 103 | 6      |
| 2                                    | 120  | 146 | 27     |
| 3                                    | 172  | 179 | 8      |
| Filtered Regions                     |      |     |        |
|                                      | From | To  | Length |
| 1                                    | 6    | 13  | 8      |
| 2                                    | 148  | 149 | 2      |

#### ModPred and PROSITE:

ModPred: Proteolytic cleavage (R116, D117, N121).

PROSITE: No identified domain recognition sites.

## Structural modelling:

|                                                                                   | Name                     | Title                           | Identity | Method      | Oligo State | Ligands |
|-----------------------------------------------------------------------------------|--------------------------|---------------------------------|----------|-------------|-------------|---------|
|  | <a href="#">2myn.1.A</a> | Glutaredoxin arsenate reductase | 17.91    | NMR         | monomer     | None    |
|  | <a href="#">1ybx.1.A</a> | Conserved hypothetical protein  | 19.44    | X-ray, 1.8Å | homo-dimer  | None    |

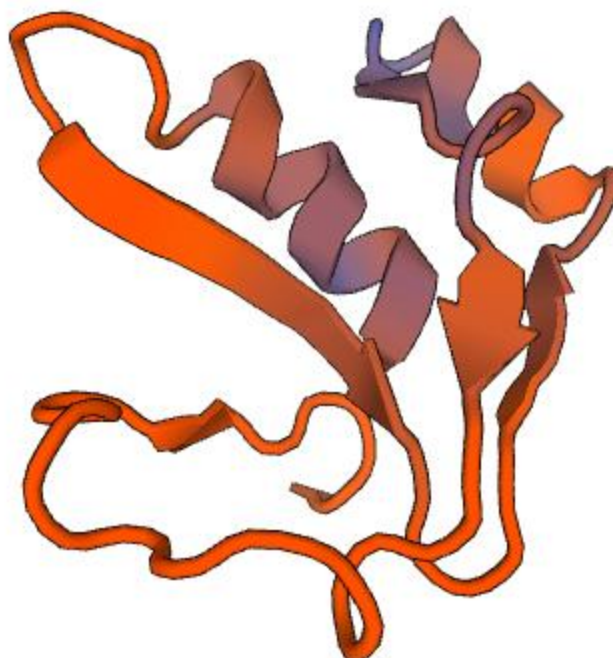

Model #1: Residues 35-78 of MVLG\_03398T0 with 2myn.1.A (17.91 % sequence identity) as a template

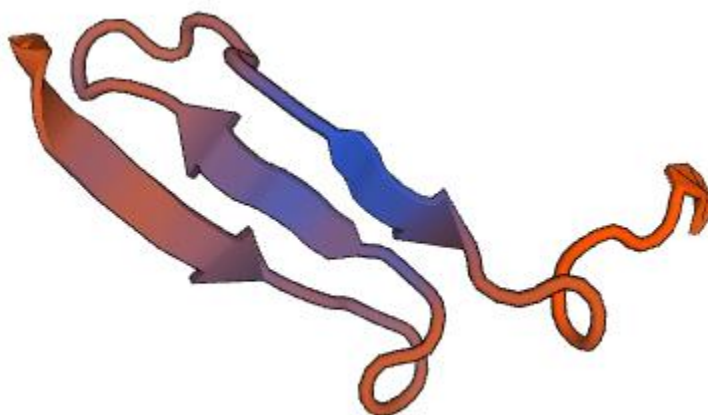

Model #2: Residues 117-152 of MVLG\_03398T0 with 1ybx.1.A (19.44 % sequence identity) as a template

> MVLG\_05716T0 (41.84%)- 141 aa  
MMYSSLFIFAF~~TVVGA~~IVNAKMAKVATNSQTTS~~LG~~PVAGVEKFHQPYWKNGTAAPAAACVAVSQA  
CFECLSKCYQH~~HNQ~~WGFGNKTDCYYGQCNN~~TRETRY~~KESCAIENNAKTCS~~DGL~~PKAQQTGGP~~MLE~~  
N~~CKQ~~ANGTSLY

PONDR:

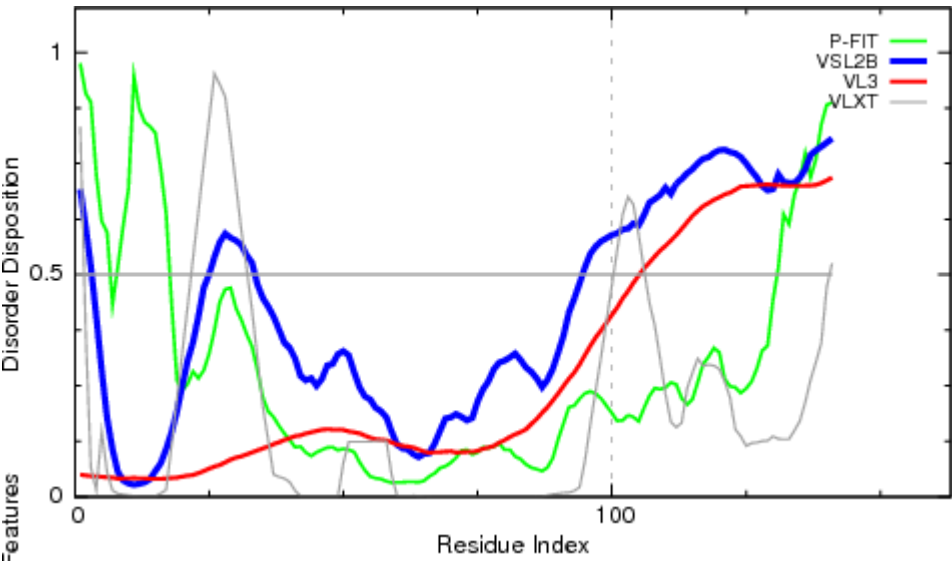

| =====PONDR VSL2 STATISTICS=====       |                                  |
|---------------------------------------|----------------------------------|
| Predicted residues: 141               | Number Disordered Regions: 3     |
| Number residues disordered: 59        | Longest Disordered Region: 47    |
| Overall percent disordered: 41.84     | Average Prediction Score: 0.4194 |
| Predicted disorder segment [1]-[3]    | Average Strength= 0.6057         |
| Predicted disorder segment [25]-[33]  | Average Strength= 0.5559         |
| Predicted disorder segment [95]-[141] | Average Strength= 0.6970         |

ANCHOR:

| Predicted Disordered Binding Regions |      |    |        |
|--------------------------------------|------|----|--------|
|                                      | From | To | Length |
| None                                 |      |    |        |

ModPred and PROSITE:

ModPred: Disulphide linkage (C87, C92), Carboxylation (E102).

PROSITE: No identified domain recognition sites.

## Structural modelling:

| Name                                                                                                      | Title        | Identity | Method      | Oligo State   | Ligands        |
|-----------------------------------------------------------------------------------------------------------|--------------|----------|-------------|---------------|----------------|
|  <a href="#">1mm9.1.A</a> | Streptavidin | 15.56    | X-ray, 1.7Å | homo-tetramer | 8 x <u>MRD</u> |

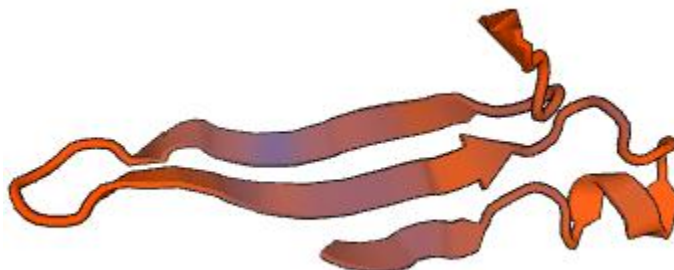

Model: Residues 79-125 of MVLG\_05716T0 with 1mm9.1.A (15.56 % sequence identity) as a template

> MVLG\_04806T0 (40.65%)—647 aa

**MPDLSWFHSALLSCLGTLALS**QPINLTTYHLYDSSHAAQGLVHPDALRGELVQTPSALLNALGL  
 RDAELFVWASPKGTRGTSQVAIMQMETHEKQKVLNMQRFSQLLA AVKCKPSQVTIQFVTKAAFEA  
 ASQLWSAVNSDRIWHLQLFTSWKGCYTDGGNLKPFHLTEVSFDSEKLAATLTGNETDWKTAAHTFI  
 MSSGEHFDETPPTADGSSRPLLTRSSIFTKAGKEFAKEFKSVAKSIDKVENKFLKKIRKELHATLANK  
 HKVLRIFAFDKSYTGKTFSTPGKAASLNGSVTCTGCGPTGSLVLHTVIKVTLGEEPTVKLTMKPQNL  
 GVSGLAMSAKSDFPESFGIETPLLEQTIPAAAGFKIPEIASVGLVASLGGYGISVSNFKGNLNVAKNVSV  
 SIPDGAKLNNLVNPSNDEQSKLGGSWAPVAQSTPMHISGFGSGEFAVGLGISLSLKMEVLSFEITPAK  
 ITLSGPSIGFEFGVSSKECGPYTSVGSSHDPTYTYITPKLGFSLSVGSDDLNVDSGTWGLGIPIPDSSGGPNV  
 NSSHGTGGSGGGGGGTNPPYPSSHTNPDQKDSSQPAVKTRSVNKRHNHDPIGASKISISASKTLYE  
 QSFRLHSPICFMSGHLHQRRLPSNHGRKDEPDGGTRRLSNSSE

## PONDR:

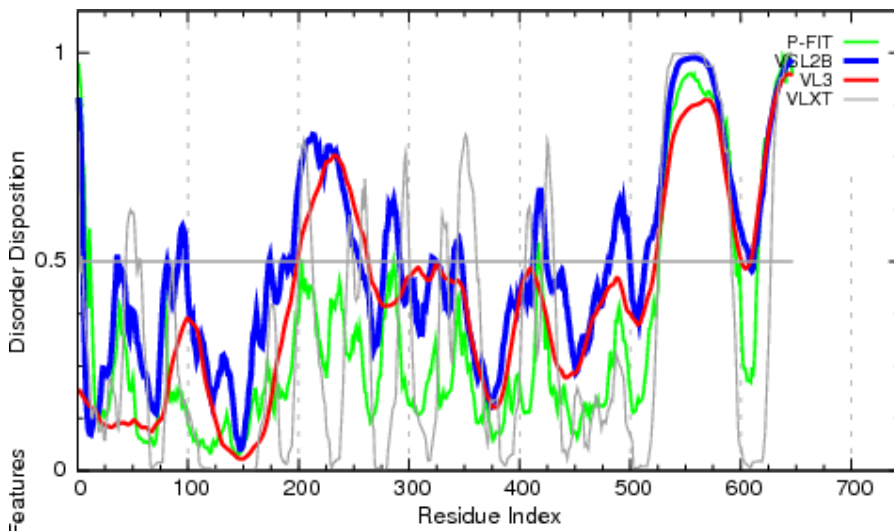

## -----PONDR VSL2 STATISTICS-----

|                                        |                                  |
|----------------------------------------|----------------------------------|
| Predicted residues: 647                | Number Disordered Regions: 14    |
| Number residues disordered: 263        | Longest Disordered Region: 94    |
| Overall percent disordered: 40.65      | Average Prediction Score: 0.4942 |
| Predicted disorder segment [1]-[5]     | Average Strength= 0.7473         |
| Predicted disorder segment [36]-[36]   | Average Strength= 0.5165         |
| Predicted disorder segment [92]-[98]   | Average Strength= 0.5592         |
| Predicted disorder segment [174]-[174] | Average Strength= 0.5079         |
| Predicted disorder segment [186]-[188] | Average Strength= 0.5043         |
| Predicted disorder segment [192]-[192] | Average Strength= 0.5019         |
| Predicted disorder segment [195]-[255] | Average Strength= 0.6964         |
| Predicted disorder segment [278]-[291] | Average Strength= 0.5958         |
| Predicted disorder segment [321]-[322] | Average Strength= 0.5085         |
| Predicted disorder segment [341]-[347] | Average Strength= 0.5378         |
| Predicted disorder segment [412]-[424] | Average Strength= 0.5981         |
| Predicted disorder segment [482]-[499] | Average Strength= 0.5869         |
| Predicted disorder segment [514]-[607] | Average Strength= 0.8037         |
| Predicted disorder segment [612]-[647] | Average Strength= 0.8180         |

**ANCHOR:**

| Predicted Disordered Binding Regions |      |     |        |
|--------------------------------------|------|-----|--------|
|                                      | From | To  | Length |
| 1                                    | 503  | 531 | 29     |
| 2                                    | 573  | 584 | 12     |
| 3                                    | 587  | 626 | 40     |
| Filtered Regions                     |      |     |        |
|                                      | From | To  | Length |
| 1                                    | 268  | 270 | 3      |
| 2                                    | 642  | 642 | 1      |
| 3                                    | 644  | 647 | 4      |

**ModPred and PROSITE:**

ModPred: Proteolytic cleavage (R49, D570, R579), Amidation (T82, T119, L217, I351, S461, S521, K583), ADP-ribosylation (R215, R579), Acetylation (K233, K244, K248), O-linked glycosylation (S533, S547), Phosphorylation (S643, S645, S646).

PROSITE: No identified domain recognition sites.

**Structural modelling:**

No templates were found matching target sequence.

> MVLG\_03092T0 (40.02%)- 812 aa

**MKFSNSIIACALLASGWADLART**HGVDAGGGSIGVSLPPTTPSDPSCTGSNEWFSPIRSTFEAHER  
 GENLDQLKQPGSIDDSEYLLNPNFSINNCQTTRYYYLDIHETRAAPDGFEREMFLFNGRINGPLIEAN  
 QGDTIVVYVHNYLDIGTTVHWHGLAQNGSGWADGPLGVTQCPIPPGTTFIYKYTLRFDQCGTYW  
 YHAHRLAHYSDDLVAPLVIHCPNDPLKRGDLYDIDQVVVVRDHYHPLSTRIISALLVNGSFQGGSSAT  
 PSPNAGLINGRGRYNCSFAPEGSVCTDDAPLTEFEPKGSRVRLRLINPSAHAQFLVSVDHPLNVVE  
 ADDTPVWQTTVHRIPINVGQRYSAILNTADNNEGDSFWMRADINTACFGANFTDLNPEVKAIIRIGP  
 ASSSPSSSVSSASSENGSNPPSQGASNGSSDSSGDHSSSGNPSDLQQSSNNNGTSGDAPDGSDQSDN  
 SGDGNASGDGRGDWGNQEDSDGSGDSDGQQGSQRGSRWKRAAGLRKRNGNNNDNNDNNDNND  
 NNDSDNNDNNDNNDNNDNNSGSNTNTNQNLPTSTDWSDAVNGSCHDLAESTLVPRVPFNPPGASIS  
 HEFRATILTPSGAFGFAANNVSFESFVDDPFLFRVNRGDDIPLGLSASIVLDDKSLAHDIVINNANPI  
 DHPFHLHGVQMHLIARGAGSVSADNISSVALNLNPNIRRDITISVTGNTFAIVRVVADNAGVWAIHC  
 HILPHQVTGLMGVVVIRPDLIRKMEIPQHARDLCTLGSSLSSAQGQDPQPNIEPGRRIRRSINPLLPSK  
 DFIRKRVLLNQD

**PONDR:**

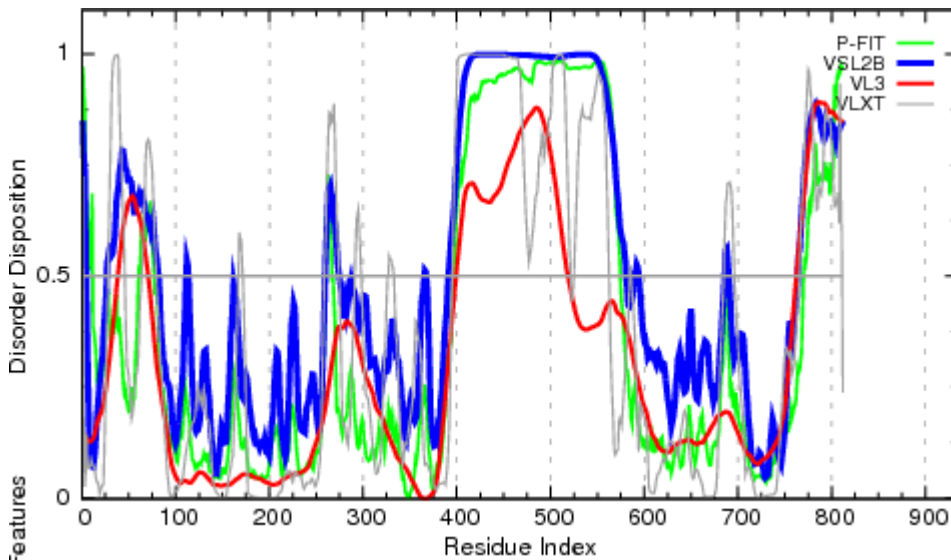

| =====PONDR VSL2 STATISTICS=====        |                                  |
|----------------------------------------|----------------------------------|
| Predicted residues: 812                | Number Disordered Regions: 9     |
| Number residues disordered: 325        | Longest Disordered Region: 189   |
| Overall percent disordered: 40.02      | Average Prediction Score: 0.4951 |
| Predicted disorder segment [1]-[4]     | Average Strength= 0.7432         |
| Predicted disorder segment [27]-[81]   | Average Strength= 0.6519         |
| Predicted disorder segment [112]-[113] | Average Strength= 0.5300         |
| Predicted disorder segment [260]-[274] | Average Strength= 0.6220         |
| Predicted disorder segment [366]-[367] | Average Strength= 0.5105         |
| Predicted disorder segment [392]-[580] | Average Strength= 0.9414         |
| Predicted disorder segment [590]-[594] | Average Strength= 0.5136         |
| Predicted disorder segment [686]-[690] | Average Strength= 0.5364         |
| Predicted disorder segment [765]-[812] | Average Strength= 0.8098         |

**ANCHOR:**

| Predicted Disordered Binding Regions |      |     |        |
|--------------------------------------|------|-----|--------|
|                                      | From | To  | Length |
| 1                                    | 98   | 103 | 6      |
| 2                                    | 371  | 403 | 33     |
| 3                                    | 440  | 452 | 13     |
| 4                                    | 459  | 465 | 7      |
| 5                                    | 471  | 488 | 18     |
| 6                                    | 498  | 516 | 19     |
| 7                                    | 563  | 588 | 26     |
| 8                                    | 801  | 809 | 9      |
| Filtered Regions                     |      |     |        |
|                                      | From | To  | Length |
| 1                                    | 6    | 17  | 12     |

**ModPred and PROSITE:**

ModPred: Amidation (S4, H346, E579, V586, L797), Proteolytic cleavage (R22, Q235, R509, R791), Sumoylation (K394), Phosphorylation (S405), GPI anchor amidation (N418), ADP-ribosylation (R514)

PROSITE: Multicopper\_oxidase1 (725-745, PROSITE entry PS00079), Multicopper\_oxidase2 (730-741, PROSITE entry PS00080).

## Structural modelling:

| Name                                                                                                       | Title                  | Identity | Method      | Oligo State  | Ligands                                                                    |
|------------------------------------------------------------------------------------------------------------|------------------------|----------|-------------|--------------|----------------------------------------------------------------------------|
|  <a href="#">3sqr.1.A</a> | laccase                | 31.29    | X-ray, 1.7Å | monomer      | 5 x <a href="#">NAG</a> , 3 x <a href="#">CU</a> , 1 x <a href="#">MAN</a> |
|  <a href="#">3gyr.1.A</a> | Phenoxazinone synthase | 17.43    | X-ray, 2.3Å | homo-hexamer | 6 x <a href="#">C2O</a> , 18 x <a href="#">CU</a>                          |

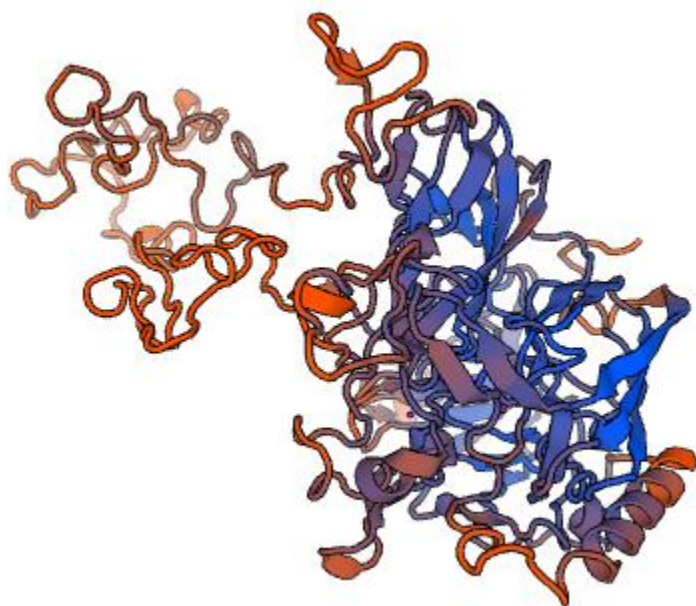

Model #1: Residues 83-787 of MVLG\_03092T0 with 3sqr.1.A (31.29 % sequence identity) as a template

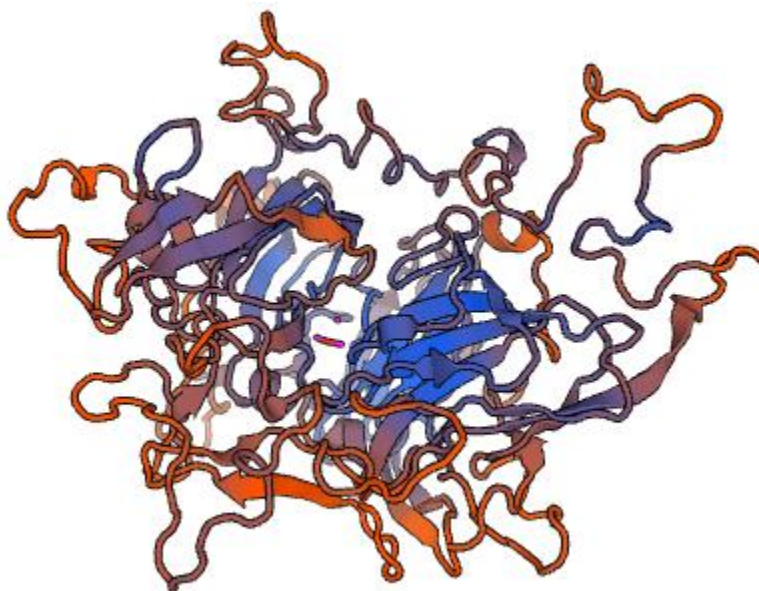

Model #2: Residues 70-756 of MVLG\_03092T0 with 3gyr.1.A (17.43 % sequence identity) as a template

> MVLG\_01652T0 (38.13%)- 237 aa

**MFRTLYRLACLSLVPALLQA**APAPVDSSLGQGVSAALKTRGSQSCRRVAQCTQAAPRNAVQTCNG  
GKCGFACKSGYTWKDKKCQAASSGQATSGGTLLAAVSGHMOVDAQLASNGITGFRAQSNGWNTNA  
IASWFRTDSIQDSTNGHSWCYNEYDDSLPGFAPDVSVMANFGGSNVRAGQAYCGLEAEVVTADG  
RTVNLIMDGFDSKWVRTPASIDVIYNAFGLLHGSTTNDKNTVESGVKWRLTGRRDSRYTFNSS

#### PONDR:

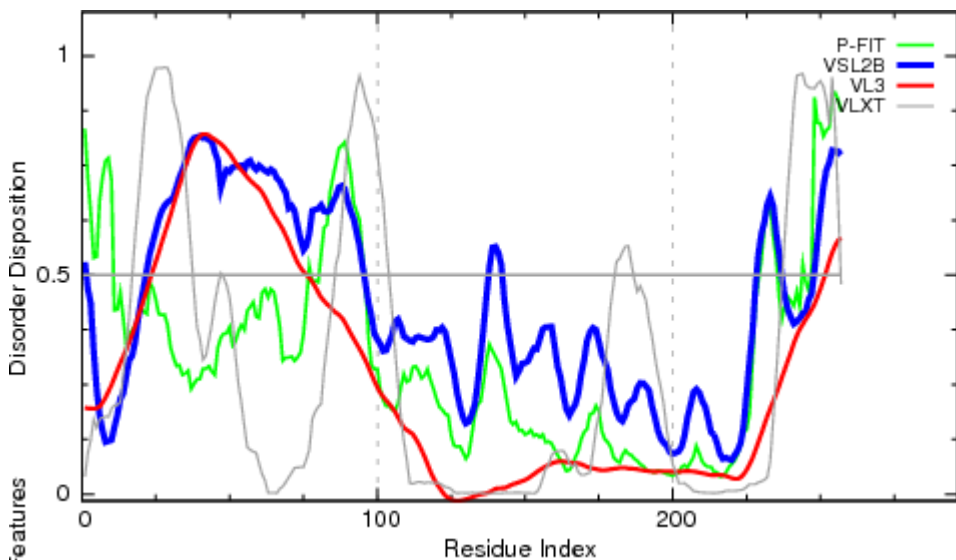

#### PONDR VSL2 STATISTICS

|                                        |                                  |
|----------------------------------------|----------------------------------|
| Predicted residues: 257                | Number Disordered Regions: 4     |
| Number residues disordered: 98         | Longest Disordered Region: 74    |
| Overall percent disordered: 38.13      | Average Prediction Score: 0.4307 |
| Predicted disorder segment [22]-[95]   | Average Strength= 0.6931         |
| Predicted disorder segment [138]-[142] | Average Strength= 0.5438         |
| Predicted disorder segment [229]-[236] | Average Strength= 0.6128         |
| Predicted disorder segment [248]-[257] | Average Strength= 0.7063         |

#### ANCHOR:

| Predicted Disordered Binding Regions |      |    |        |
|--------------------------------------|------|----|--------|
|                                      | From | To | Length |
| None                                 |      |    |        |
| Filtered Regions                     |      |    |        |
|                                      | From | To | Length |
| 1                                    | 1    | 8  | 8      |

#### ModPred and PROSITE:

ModPred: Amidation (A9, G32, F222), Pyrrolidone carboxylic acid (Q19), Disulphide linkage (C67, C148), O-linked glycosylation (S92), Proteolytic cleavage (D136).

PROSITE: No identified domain recognition sites.

## Structural modelling:

| Name                                                                                                       | Title                       | Identity | Method      | Oligo State     | Ligands |
|------------------------------------------------------------------------------------------------------------|-----------------------------|----------|-------------|-----------------|---------|
|  <a href="#">2hcz.1.A</a> | Beta-expansin 1a            | 19.82    | X-ray, 2.8Å | monomer         | None    |
|  <a href="#">1k4r.1.A</a> | MAJOR ENVELOPE<br>PROTEIN E | 17.65    | EM, 24.0Å   | homo-<br>trimer | None    |

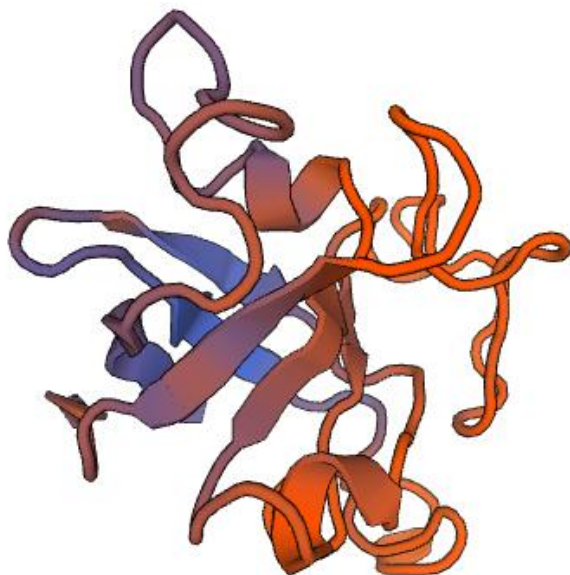

Model #1: Residues 123-244 of MVLG\_01652T0 with 2hcz.1.A (19.82 % sequence identity) as a template

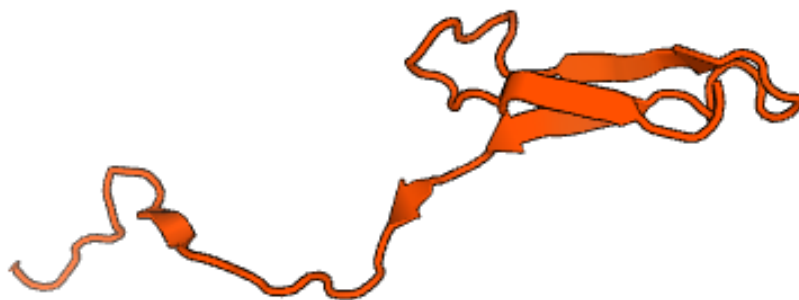

Model #2: Residues 130-191 of MVLG\_01652T0 with 1k4r.1.A (17.65 % sequence identity) as a template

> MVLG\_02018T0 (37.58%)- 165 aa

**MLLLWLRVAALALAATGGPVSA**SPLKALDNALSSLNSTGPASKLTPIPTPPTISLLSKSKTYYPGDT  
VFFKWDRAAPTMQSADLFIAYSGLATVPICVTRDMLLQPDRGSMVLHSAYVIPWKELLGQKRATV  
EGFIYFVYSPTHYRFDTGVTGGKSDSFTIQHR

#### PONDR:

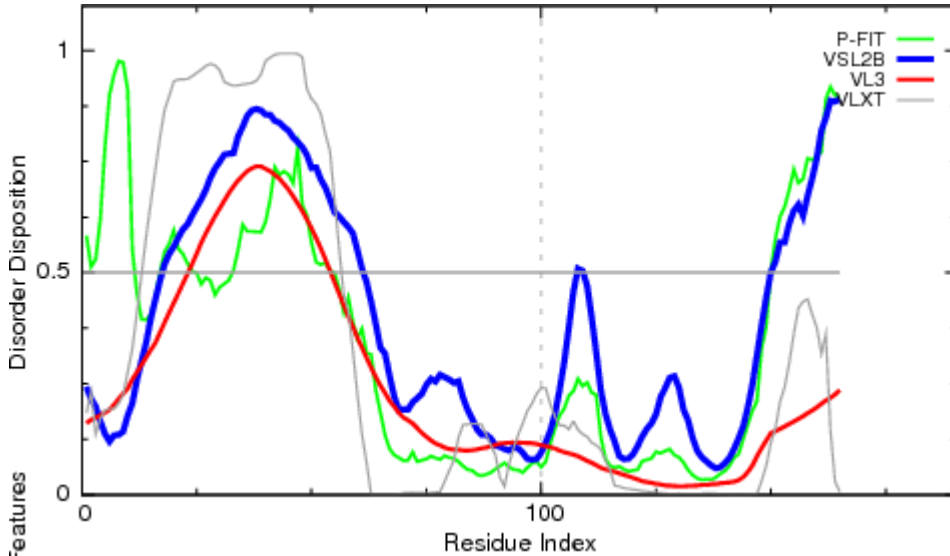

#### -----PONDR VSL2 STATISTICS-----

|                                        |                                  |
|----------------------------------------|----------------------------------|
| Predicted residues: 165                | Number Disordered Regions: 3     |
| Number residues disordered: 62         | Longest Disordered Region: 44    |
| Overall percent disordered: 37.58      | Average Prediction Score: 0.3924 |
| Predicted disorder segment [18]-[61]   | Average Strength= 0.7153         |
| Predicted disorder segment [108]-[109] | Average Strength= 0.5065         |
| Predicted disorder segment [150]-[165] | Average Strength= 0.6979         |

#### ANCHOR:

| Predicted Disordered Binding Regions |      |    |        |
|--------------------------------------|------|----|--------|
|                                      | From | To | Length |
| None                                 |      |    |        |
| Filtered Regions                     |      |    |        |
|                                      | From | To | Length |
| 1                                    | 1    | 8  | 8      |

#### ModPred and PROSITE:

ModPred: O-linked glycosylation (T49), Amidation (V140).

PROSITE: No identified domain recognition sites.

## Structural modelling:

| Name                                                                                                                                 | Title | Coverage                   | Identity | Method      | Oligo State     | Ligands        |
|--------------------------------------------------------------------------------------------------------------------------------------|-------|----------------------------|----------|-------------|-----------------|----------------|
|  <a href="#">2cp5.1.A</a> Restin                     |       | Created with Raphaël 2.2.0 | 23.44    | NMR         | monomer         | None           |
|  <a href="#">1bcp.1.D</a> PERTUSSIS TOXIN            |       | Created with Raphaël 2.2.0 | 35.19    | X-ray, 2.7Å | hetero-oligomer | 1 x <u>ATP</u> |
|  <a href="#">2jgx.1.A</a> COMPLEMENT FACTOR H        |       | Created with Raphaël 2.2.0 | 9.80     | NMR         | monomer         | None           |
|  <a href="#">1tnr.1.A</a> TUMOR NECROSIS FACTOR BETA |       | Created with Raphaël 2.2.0 | 28.57    | X-ray, 2.8Å | hetero-oligomer | None           |

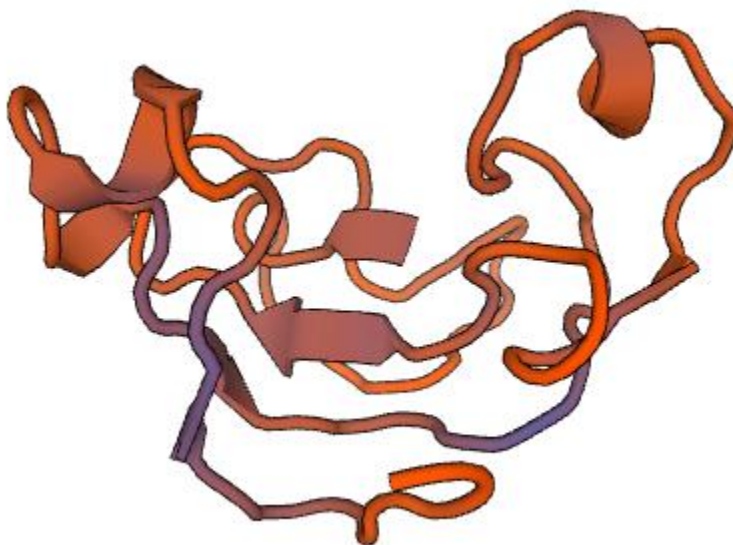

Model #1: Residues 123-244 of MVLG\_02018T0 with 2cp5.1.A (23.44 % sequence identity) as a template

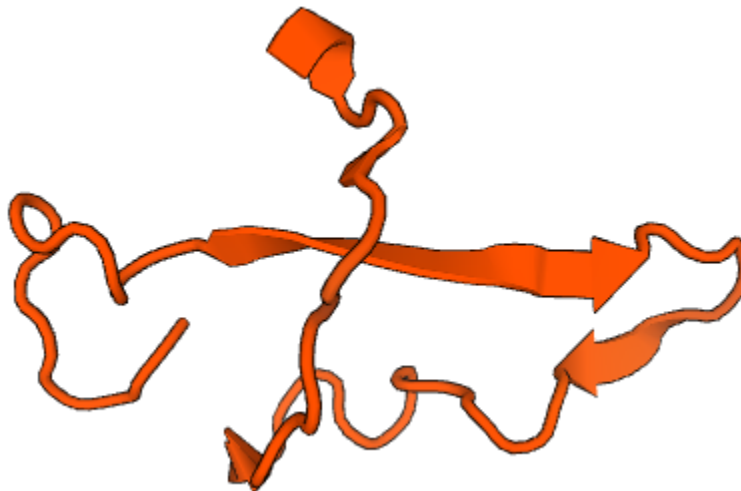

Model #2: Residues 123-244 of MVLG\_02018T0 with 1bcp.1.D (35.19 % sequence identity) as a template

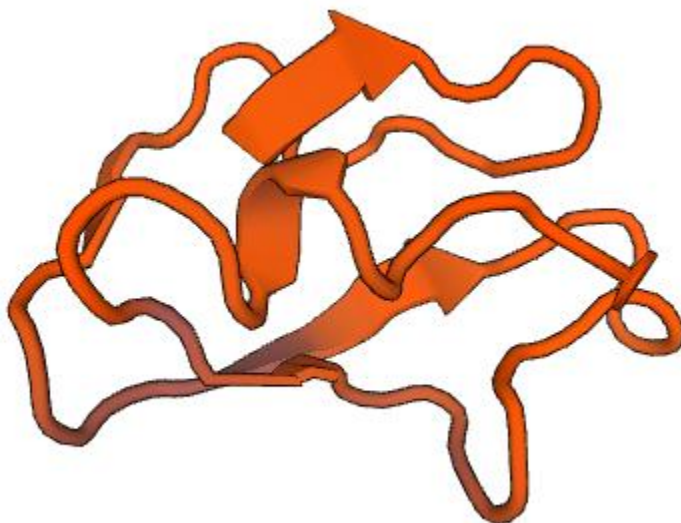

Model #3: Residues 123-244 of MVLG\_02018T0 with 2jgx.1.A (9.80 % sequence identity) as a template

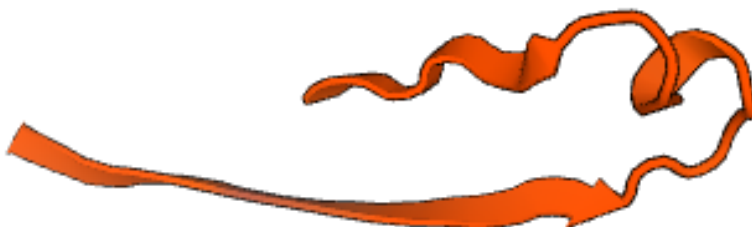

Model #4: Residues 123-244 of MVLG\_02018T0 with 1tnr.1.A (28.57 % sequence identity) as a template

> MVLG\_01824T0 (34.74%)- 639 aa

**MVYTRPCRAAAVFASIVLCLIVVVVPTS**VLALETAIVAPPDGNSSSKGPDTEIPTLAGADDGETLFLQ  
LNSTEMSPEEPLLEPHWLPLLKRARRRRKPPSEDAWSGETTTRIIGKLGIGAMQAIQSSDDELLVRH  
RAAFGAKLRPRILTQDITETSLIGSSSLNDPYLGIGRKCDFCAGGTFLSNGDIISVGGQPSEHTELGKP  
GFAEDGFTGLRIFQPTSHRLLDNPKKVHIQSARWYASVVRVTDGSALIMGSGSKKGQYNNDPKVDNP  
TMEFFPSKGPQFYSKFLQDALDSNLFPLAFLLSGSGNIFVVANHVAMIYDWKHNREHRVKGVPGGI  
VATYPGSGTAVLLPLTIKNNWISEVLICGGVFNTVNLTNPGFNVRADPEVSDQCARTSFPRGNSMSG  
WEVEHMLS PRIMGDPVITPDGQVLIVGGAKTGTAGYGNAIGMDAAV PNLVPTLYNPDA PRGQRFSE  
EFPPAKIERMYHSTSLTTEGSLVTMGSSPNRILTRLTYKSRFEVELIAPPYMTKKRPAILNYPQQIK  
YNGRYTLTMSNPMGCDNVRVVLIDGGYATHALHMNQRSVELLVTSSNQSTITFQSPHDGTIWPPGP  
AFLWITVCEGKIPSKGHKIMVGDGSNPPNYKAPF

PONDR:

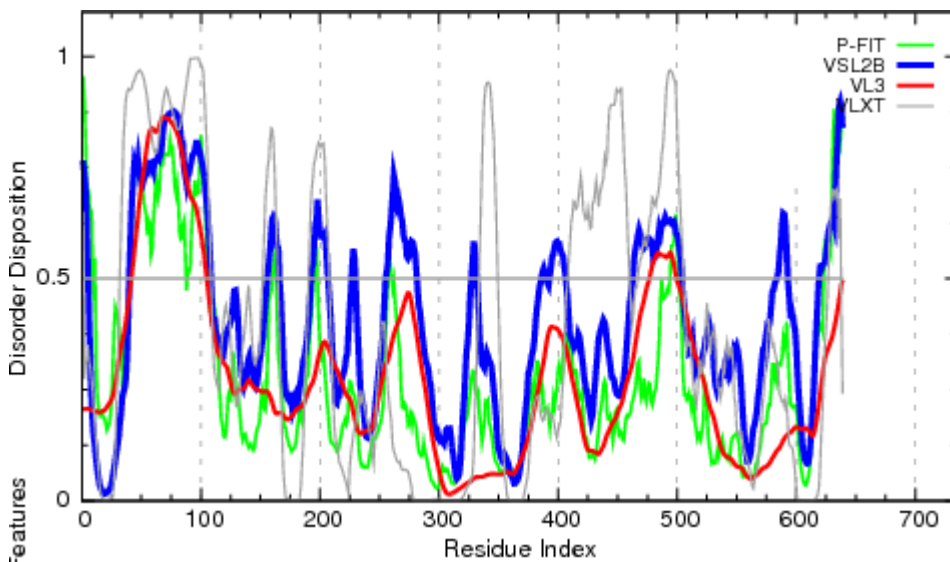

| =====PONDR VSL2 STATISTICS=====        |                                  |
|----------------------------------------|----------------------------------|
| Predicted residues: 639                | Number Disordered Regions: 12    |
| Number residues disordered: 222        | Longest Disordered Region: 69    |
| Overall percent disordered: 34.74      | Average Prediction Score: 0.4069 |
| Predicted disorder segment [1]-[5]     | Average Strength= 0.6753         |
| Predicted disorder segment [40]-[108]  | Average Strength= 0.7657         |
| Predicted disorder segment [156]-[165] | Average Strength= 0.5868         |
| Predicted disorder segment [193]-[206] | Average Strength= 0.5926         |
| Predicted disorder segment [227]-[229] | Average Strength= 0.5466         |
| Predicted disorder segment [256]-[281] | Average Strength= 0.6077         |
| Predicted disorder segment [328]-[331] | Average Strength= 0.5577         |
| Predicted disorder segment [386]-[390] | Average Strength= 0.5129         |
| Predicted disorder segment [393]-[406] | Average Strength= 0.5531         |
| Predicted disorder segment [463]-[504] | Average Strength= 0.5905         |
| Predicted disorder segment [584]-[593] | Average Strength= 0.5737         |
| Predicted disorder segment [620]-[639] | Average Strength= 0.6653         |

**ANCHOR:**

| Predicted Disordered Binding Regions |      |     |        |
|--------------------------------------|------|-----|--------|
|                                      | From | To  | Length |
| 1                                    | 85   | 90  | 6      |
| 2                                    | 113  | 121 | 9      |
| 3                                    | 173  | 183 | 11     |
| 4                                    | 606  | 614 | 9      |
| Filtered Regions                     |      |     |        |
|                                      | From | To  | Length |
| 1                                    | 14   | 27  | 14     |
| 2                                    | 66   | 69  | 4      |
| 3                                    | 363  | 366 | 4      |
| 4                                    | 427  | 430 | 4      |
| 5                                    | 510  | 511 | 2      |
| 6                                    | 560  | 560 | 1      |

**ModPred and PROSITE:**

ModPred: Amidation (A12, F276, Y635), Proteolytic cleavage (R92, R95, R136, R329, K331, R464, R467), Ubiquitination (K323), Methylation (R464).

PROSITE: No identified domain recognition sites.

**Structural modelling:**

| Name                                                                                                         | Title            | Identity | Method      | Oligo State | Ligands       |
|--------------------------------------------------------------------------------------------------------------|------------------|----------|-------------|-------------|---------------|
|  <a href="#">5lxz.1.A</a> | Secreted protein | 21.57    | X-ray, 1.5Å | monomer     | 2 x <u>CU</u> |

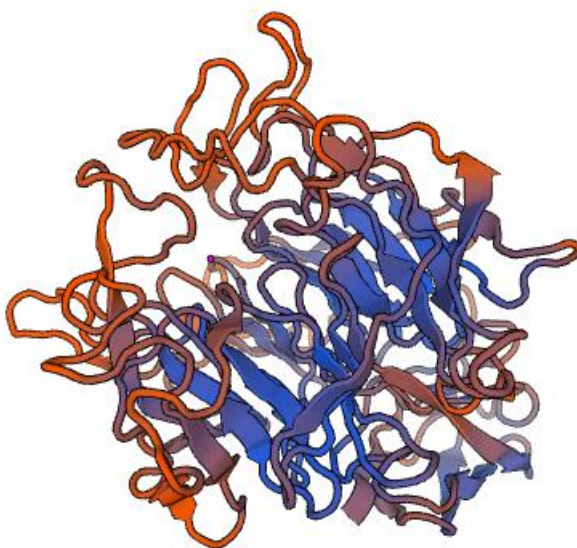

Model: Residues 99-627 of MVLG\_01824T0 with [5lxz.1.A](#) (21.57 % sequence identity) as a template

# > MVLG\_00243T0 (33.33%)- 528 aa

**MSRMNTRAVLALVLVASLQALAS**PITGITFAAGPEQALAVRAPAPAAAATARSRVQQLGADRYV  
 RLATLHTRDDEHLLEARLLNHVMIEPGLAIRAADESESEDTEEAETDDEAEFEETVEEVIERRGNSRV  
 FATSARPILAGMRPPHVIPNPKDPDFGKLTATPVRTTTTTASAKSTATTTPRATTAPSTTMTTTTTTTT  
 TTTSTRDAAAASIPTGLGCFPSNVKSIPTGVNYTATDLASSWWCADSSEYAFIGFSYSVDECQSPSTL  
 LASFTRMRKQFGARDVRLYGACDATWFNDALVDAAASANLDVYHLIWFGFDGDDQRKSRYSFAV  
 KTMRTNPKAPFVFKNVAIGSEPLYDGVLSATNLVTEIFSMKSKMAPYGTKATFSEMPYGLQINNGA  
 PSTMAAADFVEGNVLPFFDSQATTGANAWGVVSWLSYFASLAPGKIIRMTQTGWPSDQSVWKAN  
 TPTAVSSILSQASYIALLDKCSWFNANGGIGWFAHIYSDDSLPGWGLLNNGNLKFPFAPKSSC

## PONDR:

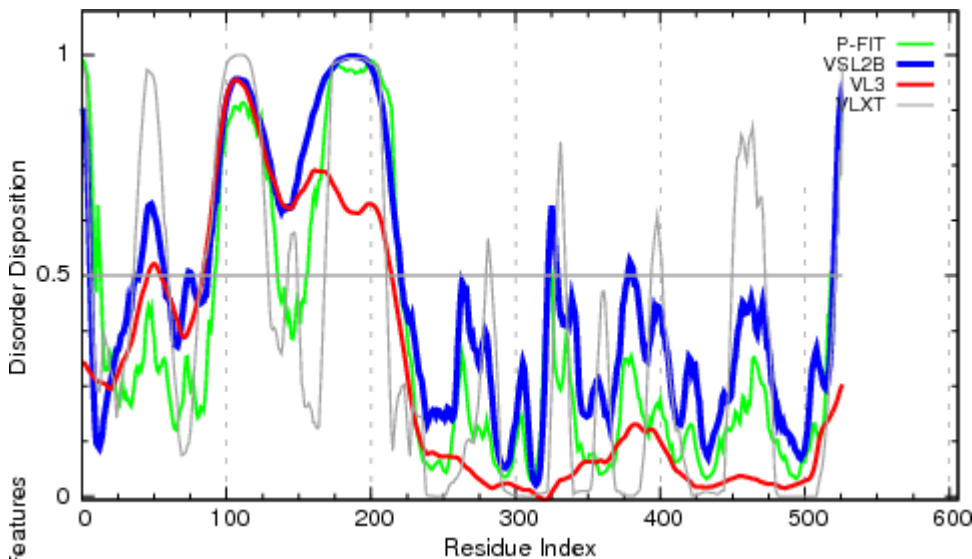

## =====PONDR VSL2 STATISTICS=====

|                                        |                                  |
|----------------------------------------|----------------------------------|
| Predicted residues: 528                | Number Disordered Regions: 7     |
| Number residues disordered: 176        | Longest Disordered Region: 133   |
| Overall percent disordered: 33.33      | Average Prediction Score: 0.4540 |
| Predicted disorder segment [1]-[5]     | Average Strength= 0.7728         |
| Predicted disorder segment [40]-[57]   | Average Strength= 0.5946         |
| Predicted disorder segment [74]-[76]   | Average Strength= 0.5057         |
| Predicted disorder segment [88]-[220]  | Average Strength= 0.8449         |
| Predicted disorder segment [323]-[328] | Average Strength= 0.5981         |
| Predicted disorder segment [378]-[381] | Average Strength= 0.5212         |
| Predicted disorder segment [522]-[528] | Average Strength= 0.7649         |

## ANCHOR:

| Predicted Disordered Binding Regions |      |     |        |
|--------------------------------------|------|-----|--------|
|                                      | From | To  | Length |
| 1                                    | 79   | 96  | 18     |
| 2                                    | 116  | 151 | 36     |
| 3                                    | 155  | 166 | 12     |
| 4                                    | 214  | 221 | 8      |

## ModPred and PROSITE:

ModPred: Amidation (A8, G359, W454, G496, Y502), Proteolytic cleavage (R62, K160, R283, R286, D322, K326, Y329, S330, D407), Carboxylation (E99, E106, E107, E109, E113, E117, E118, E121, E122), O-linked glycosylation (T169, T170, T171, T178, T180, T182, T186, S190, T196, T197, T198, T199, T200, T201, T202, T203, T204, T205, T206), Hydroxylation (P189), N-linked glycosylation (N397).

PROSITE: No identified domain recognition sites.

## Structural modelling:

| Name                                                                                                                                                                     | Title | Identity | Method      | Oligo State | Ligands        |
|--------------------------------------------------------------------------------------------------------------------------------------------------------------------------|-------|----------|-------------|-------------|----------------|
|  <a href="#">4wtr.1.A</a> beta-1,3-glucanosyltransferase                                |       | 20.54    | X-ray, 2.3Å | monomer     | 4 x <u>BGC</u> |
|  <a href="#">3pz9.1.A</a> Mannan endo-1,4-beta-mannosidase. Glycosyl Hydrolase family 5 |       | 16.02    | X-ray, 1.4Å | monomer     | None           |

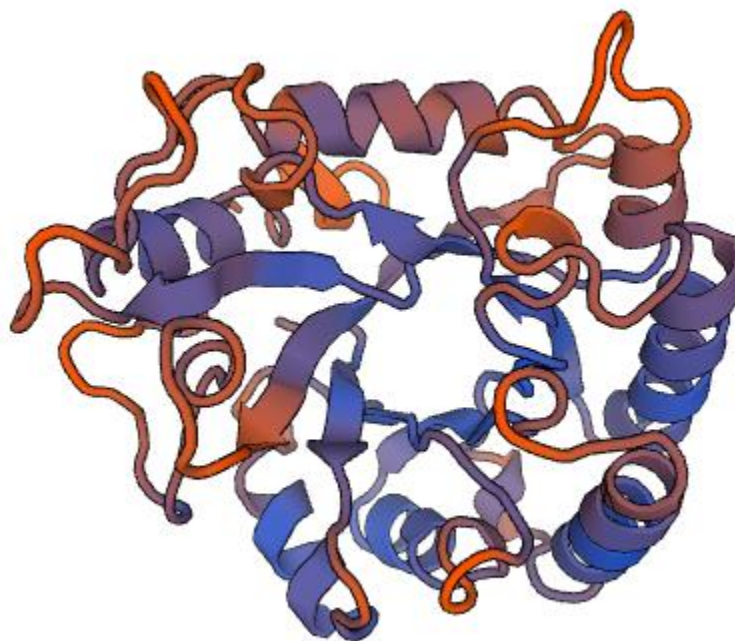

Model #1: Residues 250-528 of MVLG\_00243T0 with 4wtr.1.A (20.54 % sequence identity) as a template

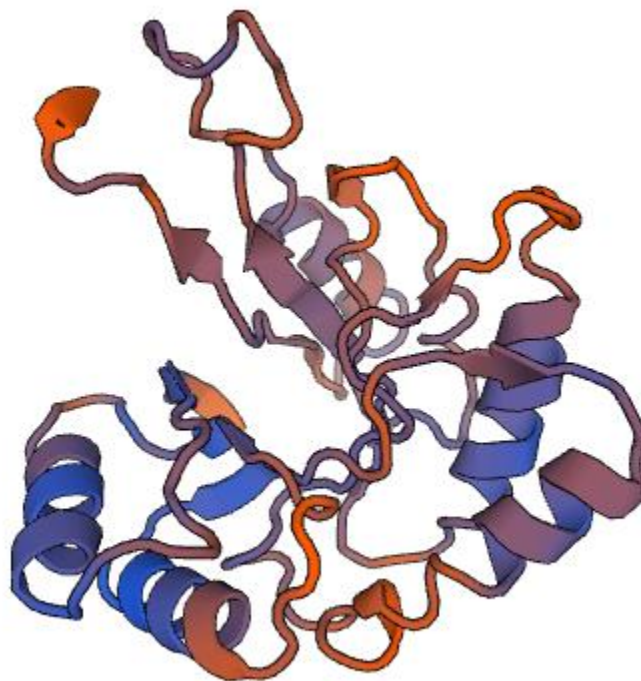

Model #2: Residues 251-458 of MVLG\_00243T0 with 3pz9.1.A (16.02 % sequence identity) as a template

# > MVLG\_02872T0 (33.33%)- 441 aa

**MFFRASTVFTSLLL**VAPALAEAPSPDKRGFKLELHSRASHNPQHAGKAPKSGHAQPYAKRLKHGP  
 AHPRRGGAKAHQGHPPFLAATKAGSRQSFANLANVENIDWSVEVTFGSPQVRVPLFLSMGSSLSSV  
 ADQNIKSDAKTRYNPSSKSLTARNMTKAQVDPNTGVTFITYKDKISIGGFVSDQTFVMTSTPNGDP  
 LERVYDSPVPWAGALALGRTSKGTPSLSFLENLIRSKVIDNAVCGISLTVEGGALFFGGIDSHSFKGKI  
 VWSPVETHYMEGFWTIKTGGWGWKGKVATGTAGLLQFAPENTYTYISAILGNKLFAGIKHHVDSK  
 TQRYLLPCNSNASDTIGFFIHNRMFPVPIPDLLFPSDSPTMCHTALLQVTNKHILDDYTVVMGALH  
 MRSFYTILSYEKEHGGAIGLAESSIKVMGGDPGPGGHSEK

## PONDR:

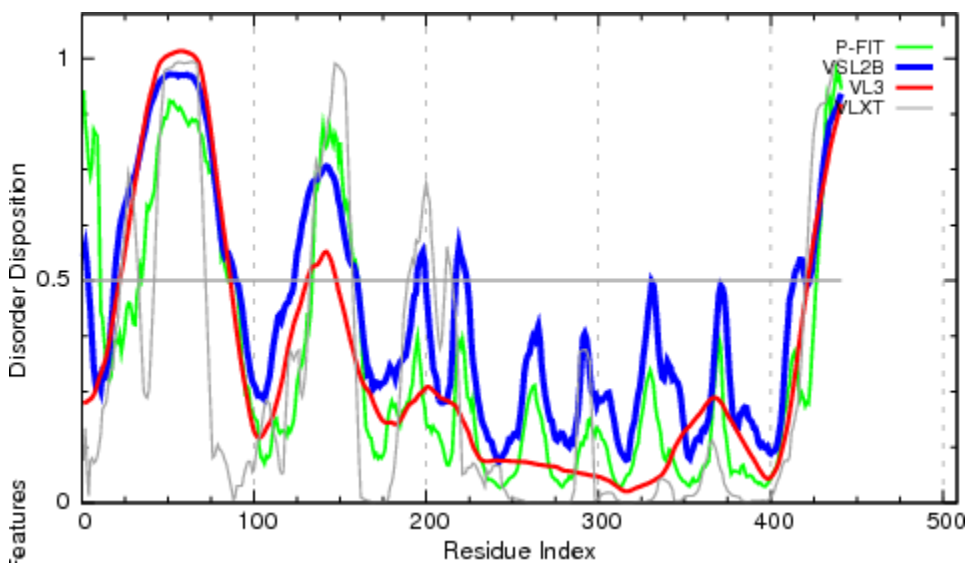

## =====PONDR VSL2 STATISTICS=====

|                                        |                                  |
|----------------------------------------|----------------------------------|
| Predicted residues: 441                | Number Disordered Regions: 7     |
| Number residues disordered: 147        | Longest Disordered Region: 71    |
| Overall percent disordered: 33.33      | Average Prediction Score: 0.4227 |
| Predicted disorder segment [1]-[3]     | Average Strength= 0.5550         |
| Predicted disorder segment [19]-[89]   | Average Strength= 0.8052         |
| Predicted disorder segment [124]-[159] | Average Strength= 0.6611         |
| Predicted disorder segment [195]-[199] | Average Strength= 0.5464         |
| Predicted disorder segment [218]-[223] | Average Strength= 0.5458         |
| Predicted disorder segment [414]-[420] | Average Strength= 0.5277         |
| Predicted disorder segment [423]-[441] | Average Strength= 0.7575         |

## ANCHOR:

| Predicted Disordered Binding Regions |      |     |        |
|--------------------------------------|------|-----|--------|
|                                      | From | To  | Length |
| 1                                    | 29   | 38  | 10     |
| 2                                    | 50   | 65  | 16     |
| 3                                    | 73   | 108 | 36     |
| 4                                    | 118  | 128 | 11     |
| 5                                    | 169  | 175 | 7      |

| Filtered Regions |      |    |        |
|------------------|------|----|--------|
|                  | From | To | Length |
| 1                | 1    | 19 | 19     |

### ModPred and PROSITE:

ModPred: Amidation (A16, D139, P271, P362), Proteolytic cleavage (K31, H35, D204), Acetylation (K59), Ubiquitination (K74), Methylation (K427)

PROSITE: Peptidase\_A1 domain (105-422, PROSITE entry PS51767), Disulphide bridge (340-376)

Eukaryotic Aspartyl proteases (Aps) form peptidase family A1.

Known eukaryotic Aps in Fungi:

- Fungal proteases such as aspergillopepsin A (EC 3.4.23.18), candidapepsin (EC 3.4.23.24), mucoropepsin (EC 3.4.23.23) (mucor rennin), endothiapepsin (EC 3.4.23.22), polyporopepsin (EC 3.4.23.29), and rhizopuspepsin (EC 3.4.23.21).
- Yeast saccharopepsin (EC 3.4.23.25) (proteinase A) (gene PEP4). PEP4 is implicated in posttranslational regulation of vacuolar hydrolases.
- Yeast barrierpepsin (EC 3.4.23.35) (gene BAR1); a protease that cleaves  $\alpha$ -factor and thus acts as an antagonist of the mating pheromone.
- Fission yeast sxal which is involved in degrading or processing the mating pheromones.

### Structural modelling:

| Name                                                                                                         | Title            | Identity | Method      | Oligo State     | Ligands |
|--------------------------------------------------------------------------------------------------------------|------------------|----------|-------------|-----------------|---------|
|  <a href="#">2psg.1.A</a> | PEPSINOGEN       | 22.58    | X-ray, 1.8Å | homo-dimer      | None    |
|  <a href="#">3zkm.1.A</a> | BETA-SECRETASE 2 | 24.17    | X-ray, 1.8Å | hetero-oligomer | None    |

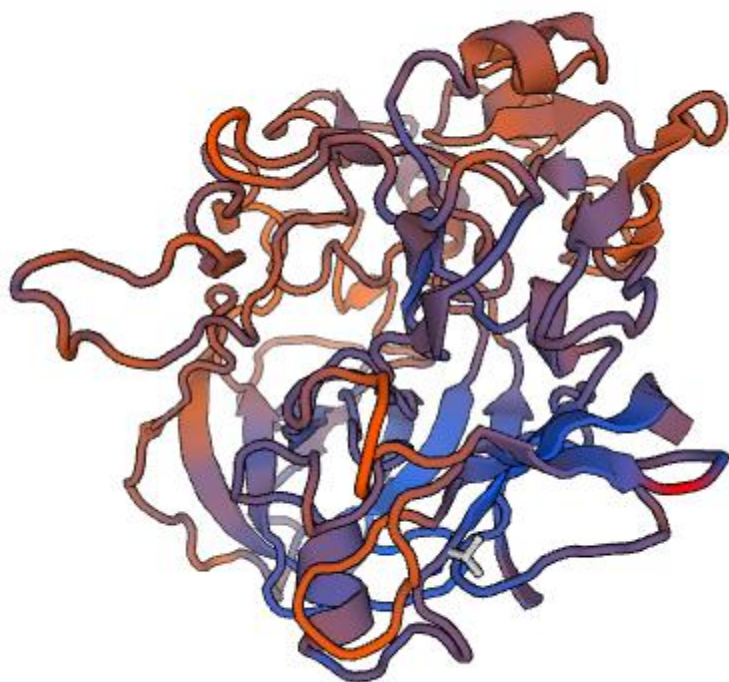

Model #1: Residues 29-425 of MVLG\_02872T0 with 2psg.1.A (22.58 % sequence identity) as a template

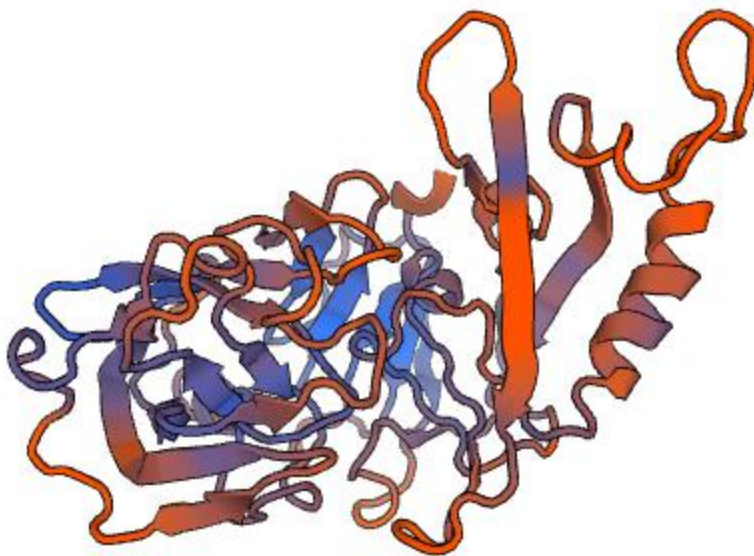

Model #2: Residues 96-428 of MVLG\_02872T0 with 3zkm.1.A (24.17 % sequence identity) as a template

> MVLG\_05120T0 (32.92%)

**MLLKLFTLALTLVSLGVSAS**QSNDTVEGRAMSPSSTKSTVTSPAYGKALKKTDEAFSFVYYPAEG  
 DRQDSFFQITKLSLKAVEKDQFPTFDFANDLSSAQTEPVSVDFRLPPLEYFNANTVKTAKTGDSIEA  
 MLEISEQNFQKQVQTINVPLTITLHAHSQ

# PONDR:

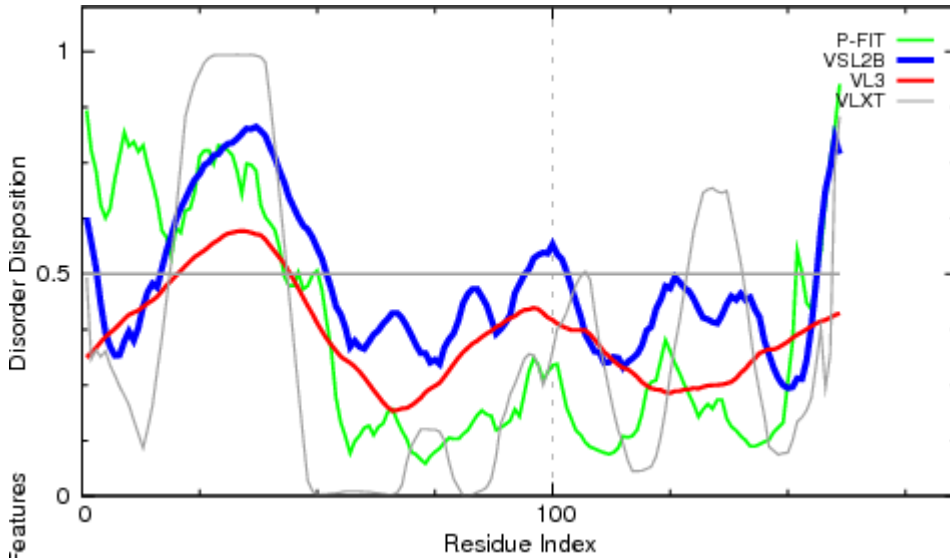

| =====PONDR VSL2 STATISTICS=====        |                                  |
|----------------------------------------|----------------------------------|
| Predicted residues: 161                | Number Disordered Regions: 4     |
| Number residues disordered: 53         | Longest Disordered Region: 36    |
| Overall percent disordered: 32.92      | Average Prediction Score: 0.4757 |
| Predicted disorder segment [1]-[3]     | Average Strength= 0.5702         |
| Predicted disorder segment [17]-[52]   | Average Strength= 0.6993         |
| Predicted disorder segment [95]-[103]  | Average Strength= 0.5370         |
| Predicted disorder segment [157]-[161] | Average Strength= 0.7201         |

# ANCHOR:

| Predicted Disordered Binding Regions |      |    |        |
|--------------------------------------|------|----|--------|
|                                      | From | To | Length |
| None                                 |      |    |        |
| Filtered Regions                     |      |    |        |
|                                      | From | To | Length |
| 1                                    | 1    | 13 | 13     |

# ModPred and PROSITE:

ModPred: Amidation (A20, Y115), Proteolytic cleavage (E28, R30, F56, D69, D107), Phosphorylation (S33), ADP-ribosylation (R109).

PROSITE: No identified domain recognition sites.

> MVLG\_00885T0 (32.89%)- 76 aa  
MRFSLAFFAVPFLVGQVVASVSDWSAKNGSFKCTSNEAGKGGKCMVCVHSNLDIFNTSLSQACG  
NCGEFCTSNVHA

PONDR:

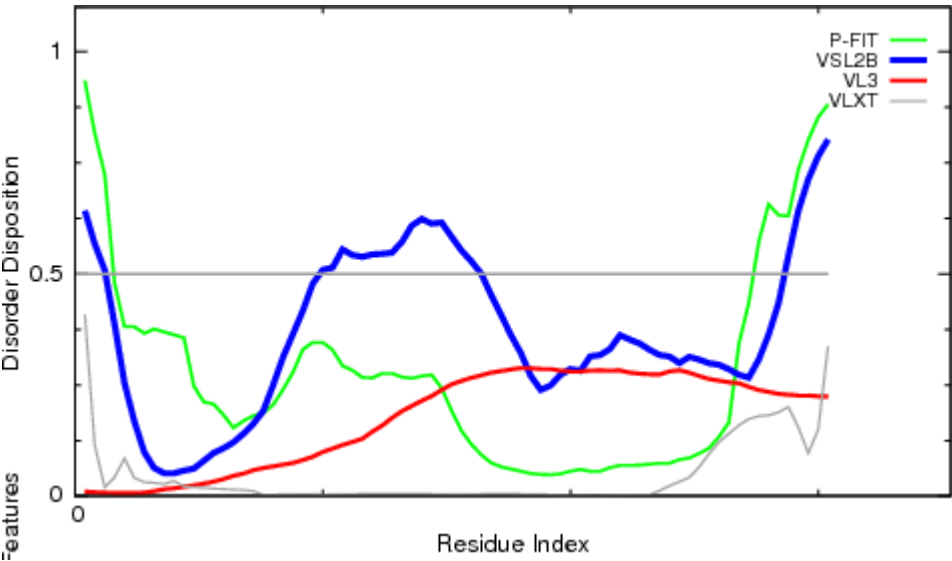

| POND VSL2 STATISTICS                 |                                  |
|--------------------------------------|----------------------------------|
| Predicted residues: 76               | Number Disordered Regions: 3     |
| Number residues disordered: 25       | Longest Disordered Region: 17    |
| Overall percent disordered: 32.89    | Average Prediction Score: 0.3704 |
| Predicted disorder segment [1]-[3]   | Average Strength= 0.5726         |
| Predicted disorder segment [25]-[41] | Average Strength= 0.5583         |
| Predicted disorder segment [72]-[76] | Average Strength= 0.6922         |

ANCHOR:

| Predicted Disordered Binding Regions |      |    |        |
|--------------------------------------|------|----|--------|
|                                      | From | To | Length |
| None                                 |      |    |        |

ModPred and PROSITE:

ModPred: Amidation (A6, L52).

PROSITE: No identified domain recognition sites.

Structural modelling:

No templates were found matching target sequence.

> MVLG\_00677T0 (32.03%)- 215 aa

**MRASVILPLCLGLLSY**CASAAPSLEPPFTYQIPSPERIAELAQPYLINPENYSKTVYYRHEPRDHISY  
 VMYAFQSMTNTSKWASAVVRHTYGHPPKDSNFEPITTTDIALSMPHIIPAPIPEGTPEGEGQPVQVEY  
 VRNRNVYRKVFLWHQPRSAVLGLEEKQLQGLTLIDLGNIDPTTQPVMREYSEDMAKELGEGCPVSG  
 AMFERHMKDVQMYQ

PONDR:

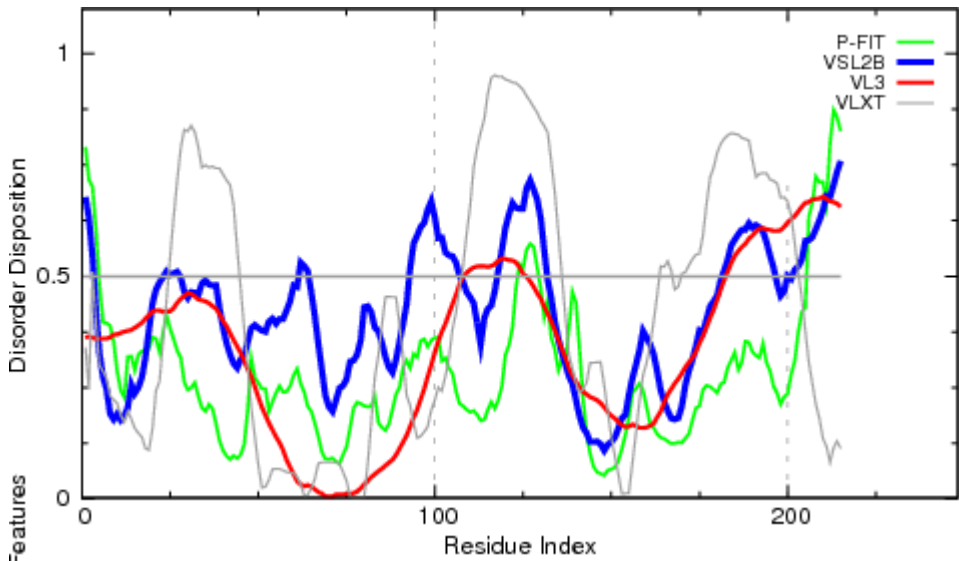

| =====PONDR VSL2 STATISTICS=====        |                                  |
|----------------------------------------|----------------------------------|
| Predicted residues: 215                | Number Disordered Regions: 8     |
| Number residues disordered: 69         | Longest Disordered Region: 15    |
| Overall percent disordered: 32.09      | Average Prediction Score: 0.4189 |
| Predicted disorder segment [1]-[3]     | Average Strength= 0.6180         |
| Predicted disorder segment [24]-[27]   | Average Strength= 0.5074         |
| Predicted disorder segment [62]-[64]   | Average Strength= 0.5218         |
| Predicted disorder segment [93]-[107]  | Average Strength= 0.5807         |
| Predicted disorder segment [118]-[131] | Average Strength= 0.6365         |
| Predicted disorder segment [182]-[196] | Average Strength= 0.5799         |
| Predicted disorder segment [200]-[200] | Average Strength= 0.5007         |
| Predicted disorder segment [202]-[215] | Average Strength= 0.6257         |

ANCHOR:

| Predicted Disordered Binding Regions |      |     |        |
|--------------------------------------|------|-----|--------|
|                                      | From | To  | Length |
| 1                                    | 142  | 150 | 9      |
| 2                                    | 163  | 171 | 9      |
| Filtered Regions                     |      |     |        |
|                                      | From | To  | Length |
| 1                                    | 10   | 13  | 4      |
| 2                                    | 70   | 74  | 5      |

## ModPred and PROSITE:

ModPred: Proteolytic cleavage (E135), ubiquitination (K191).

PROSITE: No identified domain recognition sites.

## Structural modelling:

| Name                                                                                                      | Title                                              | Identity | Method      | Oligo State   | Ligands                                |
|-----------------------------------------------------------------------------------------------------------|----------------------------------------------------|----------|-------------|---------------|----------------------------------------|
|  <a href="#">4x3i.1.A</a> | Activity-regulated cytoskeleton-associated protein | 27.91    | X-ray, 1.8Å | monomer       | 1 x <u>ALA-THR-ARG-ASN-PHE-SER-GLY</u> |
|  <a href="#">2d9d.1.A</a> | BAG family molecular chaperone regulator 5         | 23.68    | NMR         | monomer       | None                                   |
|  <a href="#">1rl2.1.A</a> | PROTEIN (RIBOSOMAL PROTEIN L2)                     | 20.00    | X-ray, 2.3Å | monomer       | None                                   |
|  <a href="#">1m6x.1.I</a> | Flp recombinase                                    | 33.33    | X-ray, 2.8Å | homo-tetramer | None                                   |

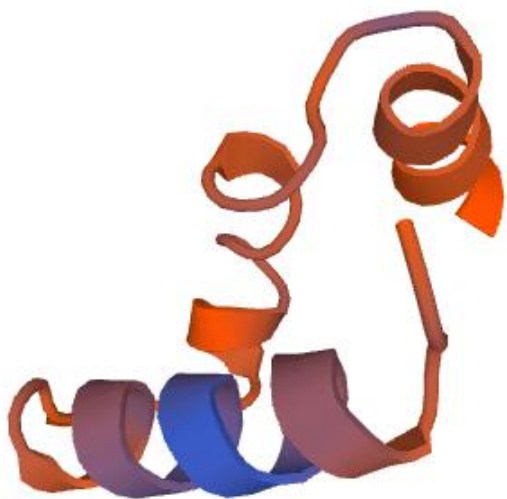

Model #1: Residues 60-102 of MVLG\_00677T0 with 4x3i.1.A (27.91% sequence identity) as a template

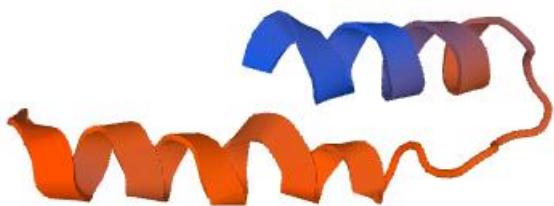

Model #2: Residues 155-193 of MVLG\_00677T0 with 2d9d.1.A (23.68% sequence identity) as a template

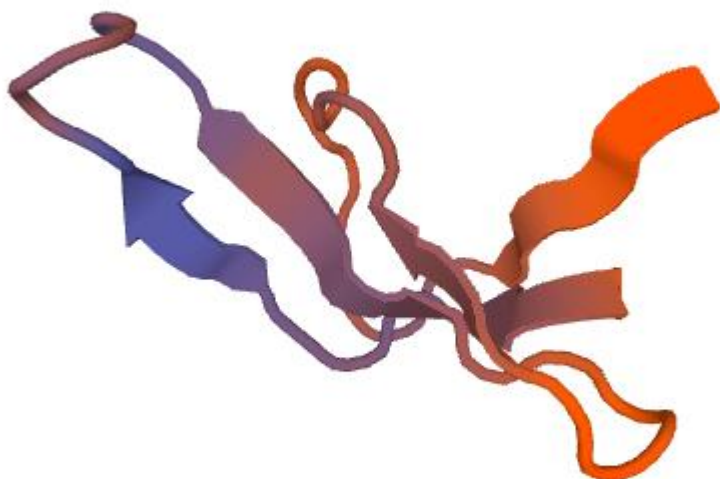

Model #3: Residues 128-172 of MVLG\_00677T0 with 1rl2.1.A (20.00% sequence identity) as a template

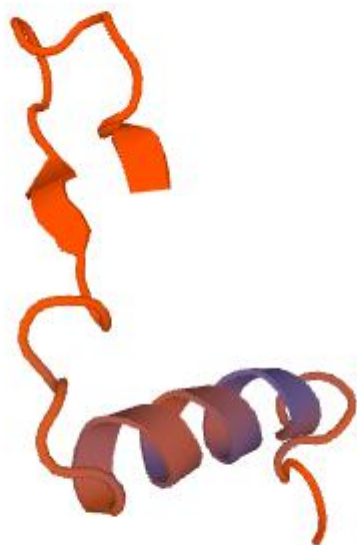

Model #4: Residues 58-99 of MVLG\_00677T0 with 1m6x.1.I (33.33% sequence identity) as a template

> MVLG\_02682T0 (31.70%)- 511 aa

**MVQVHHRPTGIKRLFCWVLVLQLASLSAFA**ALDTAKREACQVFTNSPDLSKCPVDTIYVSARDP  
 KAKFKSIQQAINYLKATTANTPATILIGSGVYQEQLVVDGFASITLLGQTTSPRSSYAHNTVDINHNR  
 VLQKSDGYQNWLSTLLVNGCADFKAYNLNLRQTAPVGIALAVAVMSSSGSFYACAIEGYQDTLF  
 LGPNKTRGYLYGCVVSGVVDVIYGWATLVVKDSQIMLLGEGTAYVAWRGAETTTSGAYFFGSTFD  
 AAQNSFGKIYPRTVAVGRAWNDKARIVILDCYLGSMIVPGIFAPWSYNPKDTRLSNEVFFGEYNSQG  
 PGSEAKSKIIVDSRTGKVDVDHLLHVLDTKSAAPYYSLSTIFGQDILWIDGNFNVKAVSLASGGVGGG  
 STPGALAAAPALAASLPPPAPSAGKGTPLTKQDPKKPTQDPKKTEHNPTKQKSKHHSHPKRKKKAT  
 STKPQVDSGAGASSNHVSGGRPNLASLPKKRGHSGGHPHHHHHHHHHHG

## PONDR:

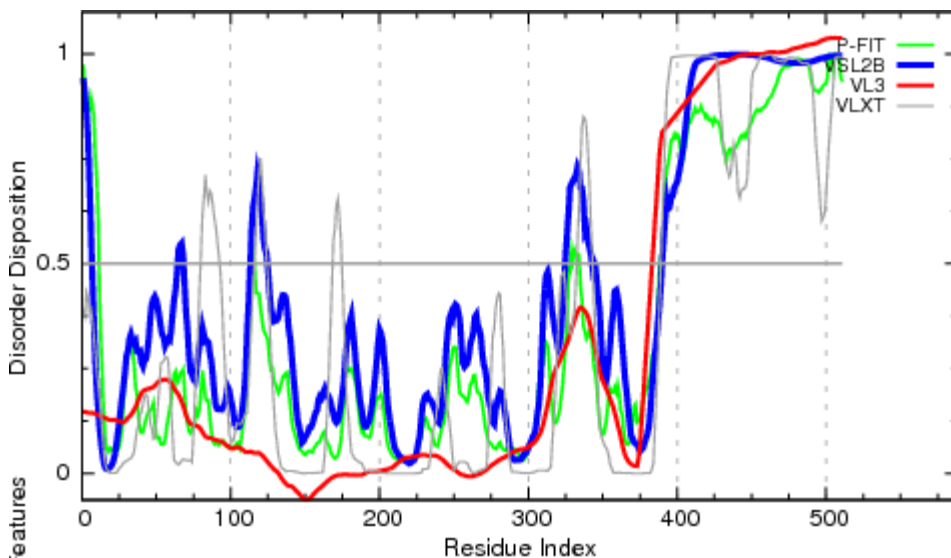

| =====PONDR VSL2 STATISTICS=====        |                                  |
|----------------------------------------|----------------------------------|
| Predicted residues: 511                | Number Disordered Regions: 6     |
| Number residues disordered: 162        | Longest Disordered Region: 122   |
| Overall percent disordered: 31.70      | Average Prediction Score: 0.4298 |
| Predicted disorder segment [1]-[6]     | Average Strength= 0.8039         |
| Predicted disorder segment [65]-[68]   | Average Strength= 0.5361         |
| Predicted disorder segment [114]-[124] | Average Strength= 0.6219         |
| Predicted disorder segment [325]-[342] | Average Strength= 0.6352         |
| Predicted disorder segment [344]-[344] | Average Strength= 0.5044         |
| Predicted disorder segment [390]-[511] | Average Strength= 0.9446         |

## ANCHOR:

| Predicted Disordered Binding Regions |      |     |        |
|--------------------------------------|------|-----|--------|
|                                      | From | To  | Length |
| 1                                    | 400  | 415 | 16     |
| 2                                    | 444  | 511 | 68     |
| Filtered Regions                     |      |     |        |
|                                      | From | To  | Length |
| 1                                    | 368  | 389 | 22     |
| 2                                    | 422  | 426 | 5      |

## ModPred and PROSITE:

ModPred: Amidation (N45, L111, Y363, Y364), N-linked glycosylation (N151), O-linked glycosylation (S252), Proteolytic cleavage (D340, K421, D469), Hydroxylation (P414, P415), ADP-ribosylation (R483), Methylation (K491).

PROSITE: No identified domain recognition sites.

## Structural modelling:

| Name                                                                                                       | Title                     | Identity | Method      | Oligo State     | Ligands                                                                            |
|------------------------------------------------------------------------------------------------------------|---------------------------|----------|-------------|-----------------|------------------------------------------------------------------------------------|
|  <a href="#">1xg2.1.A</a> | Pectinesterase 1          | 21.12    | X-ray, 1.9Å | hetero-oligomer | None                                                                               |
|  <a href="#">4pmh.1.A</a> | Pectinesterase            | 22.18    | X-ray, 1.8Å | monomer         | None                                                                               |
|  <a href="#">4pew.1.A</a> | Putative secreted protein | 17.53    | X-ray, 1.5Å | monomer         | 1 x <u>MG</u>                                                                      |
|  <a href="#">4xr6.1.A</a> | Tail spike protein        | 12.24    | X-ray, 1.8Å | homo-trimer     | 6 x <u>GLC</u> , 3 x <u>GLA</u> , 3 x <u>RAM</u> , 6 x <u>NAG</u> , 3 x <u>NDG</u> |
|  <a href="#">4xop.1.A</a> | Tail spike protein        | 10.34    | X-ray, 1.6Å | homo-trimer     | 6 x <u>GLC</u> , 3 x <u>GLA</u> , 3 x <u>RAM</u> , 6 x <u>NAG</u> , 3 x <u>NDG</u> |

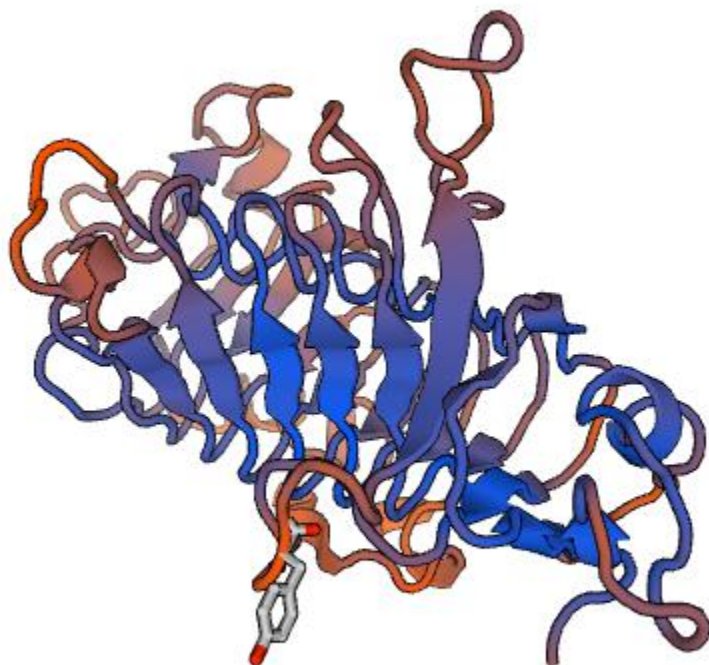

Model #1: Residues 54-387 of MVLG\_02682T0 with 1xg2.1.A (21.12% sequence identity) as a template

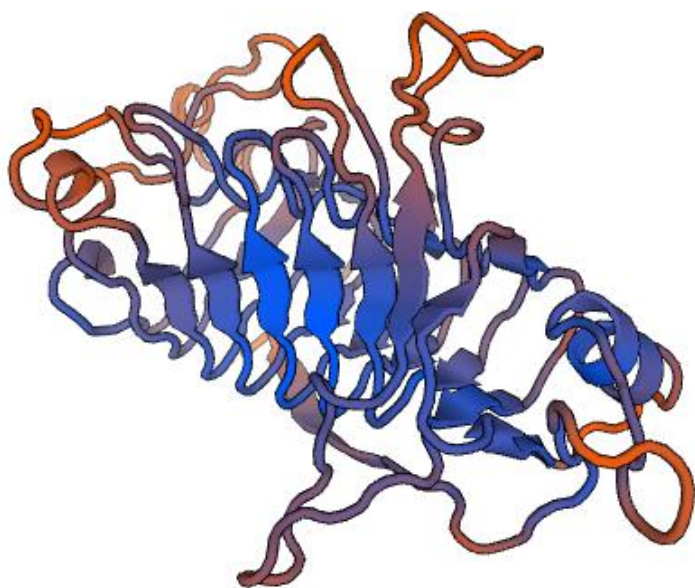

Model #2: Residues 41-332 of MVLG\_02682T0 with 4pmh.1.A (22.18% sequence identity) as a template

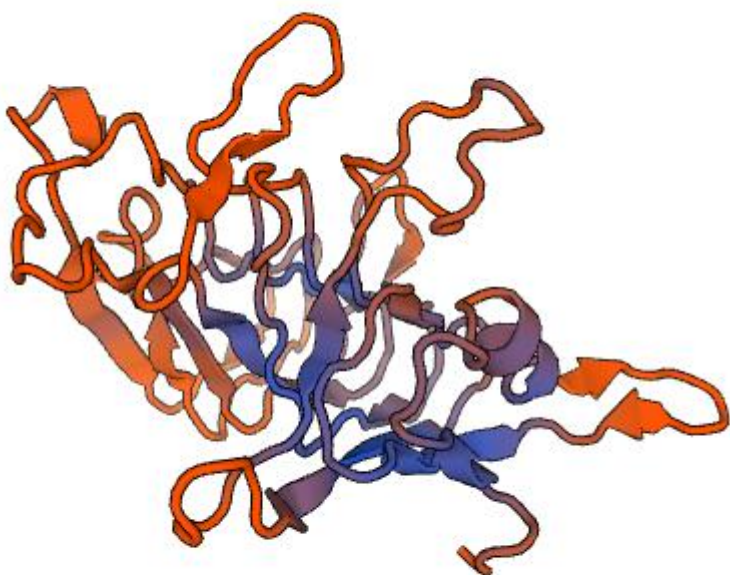

Model #3: Residues 52-305 of MVLG\_02682T0 with 4pew.1.A (17.53% sequence identity) as a template

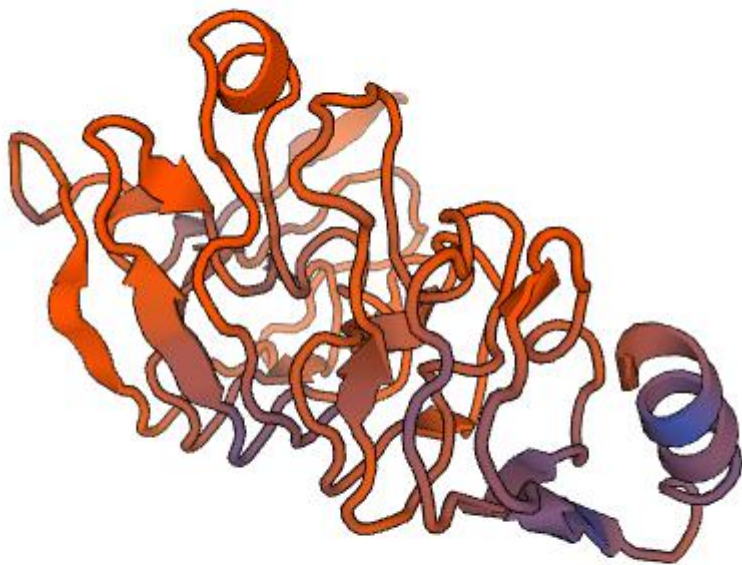

Model #4: Residues 71-284 of MVLG\_02682T0 with 4xr6.1.A (12.24% sequence identity) as a template

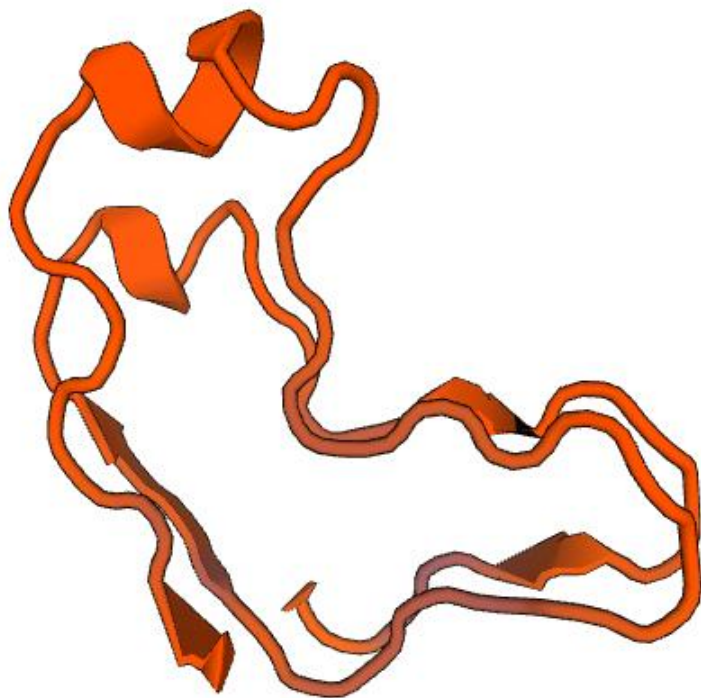

Model #5: Residues 153-215 of MVLG\_02682T0 with 4xop.1.A (10.34% sequence identity) as a template

# > MVLG\_03747T0 (31.36%)- 456 aa

**MKIILAAALPLSLAALAGA**HKHSSGHSSSHRYRHHRASGVLQASSGTTTCIVDESGVGQDSTPKIMDA  
 FTKCQKNAKIVLNGNYLVKSLLYTPMLYNVEIELTGTLTYSDDIAYWSKPTTDTHTGDGSYELYYYQN  
 VTFFFLQGEKIWLHGSPTSKTСКАЕКQSTFNGNGQKWWDQFVKDKKAGNLHGIESTEYARPILLTI  
 GNAKNVRVEYINFLNGPFWNIFITHSKQVTMSNINIDAVSKSDSLPYNTDGVDTYNSDDVTLLDFNV  
 NNADDCVSLKPNSTNVEVGRVNCNGSHGISVGSLGQYVDSYDIVENVYIHDISMSNAQAGARIKAW  
 PDRNGTAKDAGGGSGYVKNITFQNFVNKNVDEPLLITSCYMNSNEYCTKFPSKMTVSDVHYINVTG  
 TSSGKYKDVVALLDCSKECTGITAIGTHLSLPTPSTPPVYNCHNV DSEKQLDFHCTEL

## PONDR:

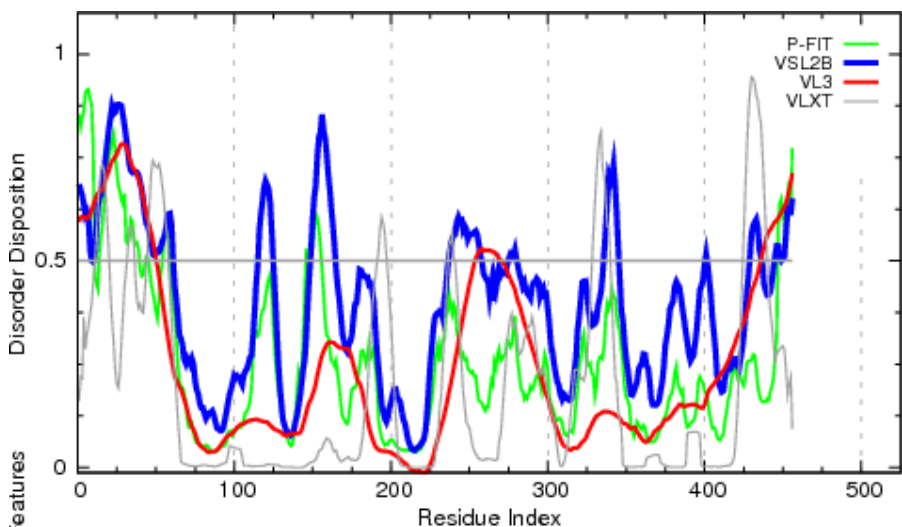

### =====PONDR VSL2 STATISTICS=====

|                                        |                                  |
|----------------------------------------|----------------------------------|
| Predicted residues: 456                | Number Disordered Regions: 10    |
| Number residues disordered: 143        | Longest Disordered Region: 51    |
| Overall percent disordered: 31.36      | Average Prediction Score: 0.3970 |
| Predicted disorder segment [1]-[9]     | Average Strength= 0.6124         |
| Predicted disorder segment [11]-[61]   | Average Strength= 0.6787         |
| Predicted disorder segment [116]-[124] | Average Strength= 0.6396         |
| Predicted disorder segment [149]-[164] | Average Strength= 0.6972         |
| Predicted disorder segment [237]-[257] | Average Strength= 0.5645         |
| Predicted disorder segment [275]-[280] | Average Strength= 0.5112         |
| Predicted disorder segment [336]-[345] | Average Strength= 0.6419         |
| Predicted disorder segment [401]-[401] | Average Strength= 0.5162         |
| Predicted disorder segment [429]-[436] | Average Strength= 0.5581         |
| Predicted disorder segment [445]-[456] | Average Strength= 0.5574         |

## ANCHOR:

| Predicted Disordered Binding Regions |      |     |        |
|--------------------------------------|------|-----|--------|
|                                      | From | To  | Length |
| 1                                    | 307  | 314 | 8      |
| Filtered Regions                     |      |     |        |
|                                      | From | To  | Length |
| 1                                    | 1    | 13  | 13     |
| 2                                    | 136  | 139 | 4      |
| 3                                    | 213  | 213 | 1      |
| 4                                    | 215  | 218 | 4      |

ModPred and PROSITE:

ModPred: Proteolytic cleavage (R34, K340), Ubiquitination (K340), Amidation (K415).

PROSITE: POLYGALACTURONASE ( Polygalacturonase active site, 286-299, PROSITE entry PS00502)  
Polygalacturonase (EC 3.2.1.15) (PG) (pectinase) catalyzes the random hydrolysis of 1,4- $\alpha$ -D-galactosiduronic linkages in pectate and other galacturonans. In plant bacterial pathogens such as *Erwinia carotovora* or *Pseudomonas solanacearum* and fungal pathogens such as *Aspergillus niger*, polygalacturonase is involved in maceration and soft-rotting of plant tissue.

Structural modelling:

| Name                                                                                                         | Title                             | Identity | Method      | Oligo State     | Ligands                                                                            |
|--------------------------------------------------------------------------------------------------------------|-----------------------------------|----------|-------------|-----------------|------------------------------------------------------------------------------------|
|  <a href="#">4c2l.1.A</a>   | ENDO-XYLOGALACTURONAN HYDROLASE A | 37.40    | X-ray, 1.8Å | monomer         | 1 x <u>NAG-NAG</u> , 1 x <u>NAG</u> , 1 x <u>MAN</u>                               |
|  <a href="#">3lmw.1.A</a>   | Iota-carrageenase, CgiA           | 14.05    | X-ray, 2.6Å | monomer         | 1 x <u>NI</u> , 1 x <u>CA</u>                                                      |
|  <a href="#">4xr6.1.A</a>   | Tail spike protein                | 17.69    | X-ray, 1.8Å | homo-trimer     | 6 x <u>GLC</u> , 3 x <u>GLA</u> , 3 x <u>RAM</u> , 6 x <u>NAG</u> , 3 x <u>NDG</u> |
|  <a href="#">3lmw.1.A</a>   | Iota-carrageenase, CgiA           | 10.56    | X-ray, 2.6Å | monomer         | 1 x <u>NI</u> , 1 x <u>CA</u>                                                      |
|  <a href="#">5gai.1.Z</a> | Tail fiber protein                | 17.82    | EM          | hetero-oligomer | None                                                                               |

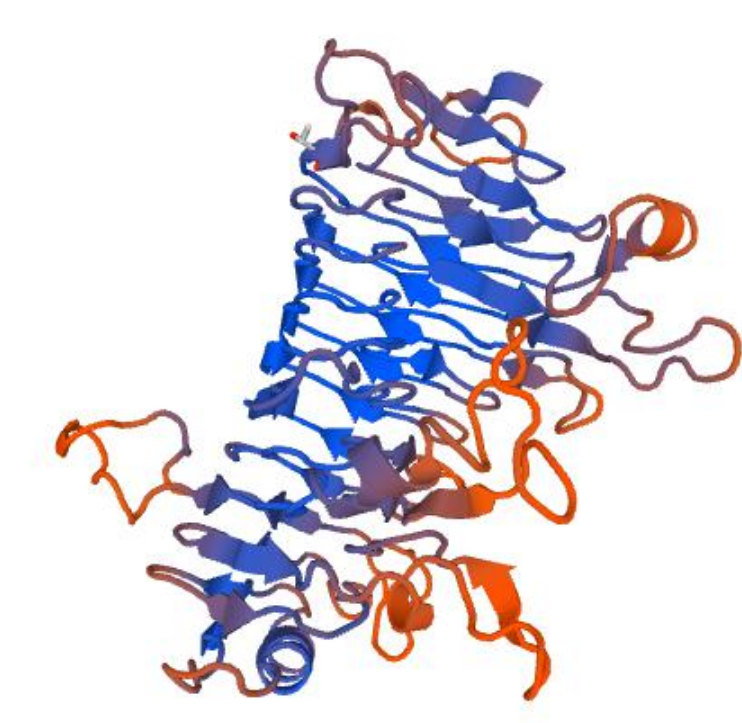

Model #1: Residues 46-455 of MVLG\_03747T0 with 4c2l.1.A (37.40% sequence identity) as a template

63

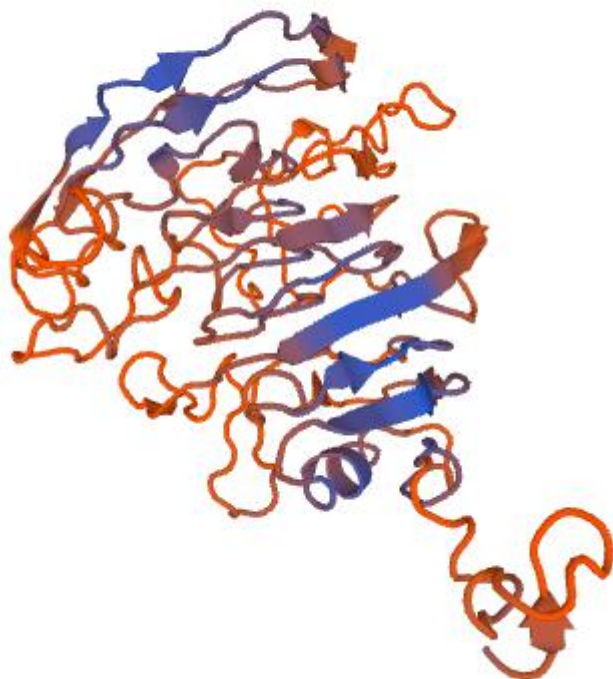

Model #2: Residues 24-401 of MVLG\_03747T0 with 4xr6.1.A (17.69% sequence identity) as a template

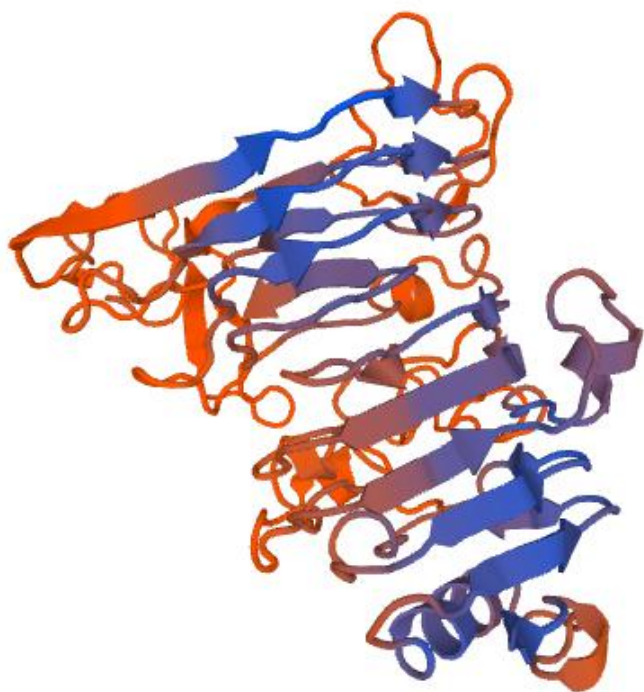

Model #3: Residues 46-422 of MVLG\_03747T0 with 3lmw.1.A (14.05% sequence identity) as a template

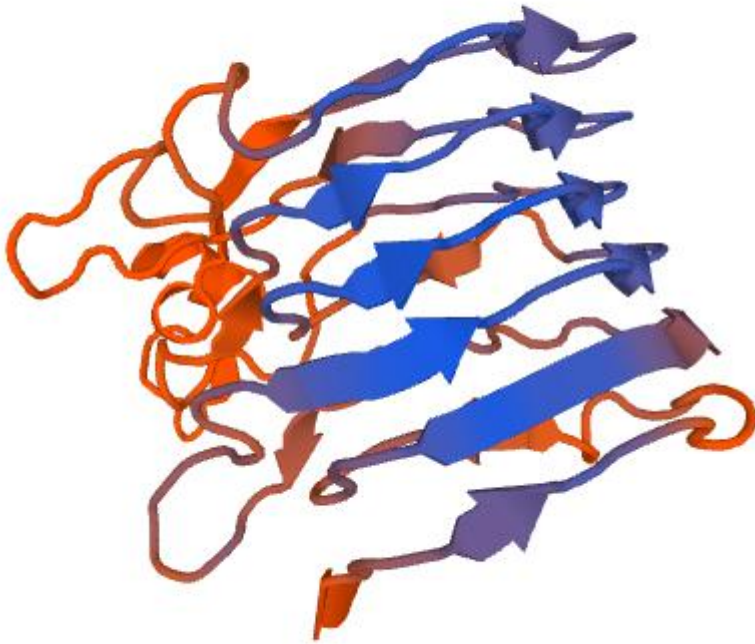

Model #4: Residues 199-397 of MVLG\_03747T0 with 3lmw.1.A (10.56% sequence identity) as a template

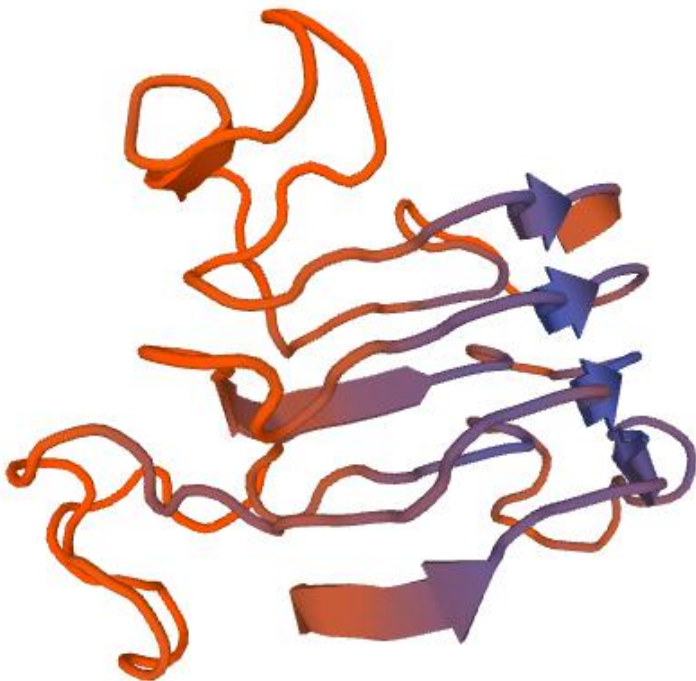

Model #5: Residues 226-362 of MVLG\_03747T0 with 5gai.1.Z (17.82% sequence identity) as a template

> MVLG\_05737T0 (31.08%)- 473 aa

**MMTPLSTLVVAAATLSSLLQVAA**TQAATTAPMLSSYFPAYTEGATVAWNQTKLAMFYVDITTKD  
 GFEIGPNQPLDGIKKFTSQAYANGAKPMVTLGWSNGSLYFSKQLSTPEGRTKLASQLQNYLYYKEF  
 KGVDVSWLYPAQQGIGCNTVSPKDTDNFLKFLKTLRGWLGMGYLISIAAPPGGFLTGNNGTEHVKD  
 YSEWATVLDHINVMTYDYTG PWSSKTGPLSPMHSCASGGGVTA AVKYWTSSGFPAEKIFISIPSYAI  
 SFTLKSSTLEKTYMTDGDGGTFNYSSLIYQSFSSIPKGEAADSNEPTTDGCGVVTANYTGQWHYTSL  
 IKEGLLAHDGSKGLKGYARYMDGCSQTPFLFNPTNKHFIAYEDAASASIKAGFARDNGLKGVTVFT  
 SEGDDTVYDAIVTDLNRPKKELES GGATGKSDTPQAQAGGKTTKPSTPPPSSKQPQDMPKKASHG  
 AGILGKMNLRAR

PONDR:

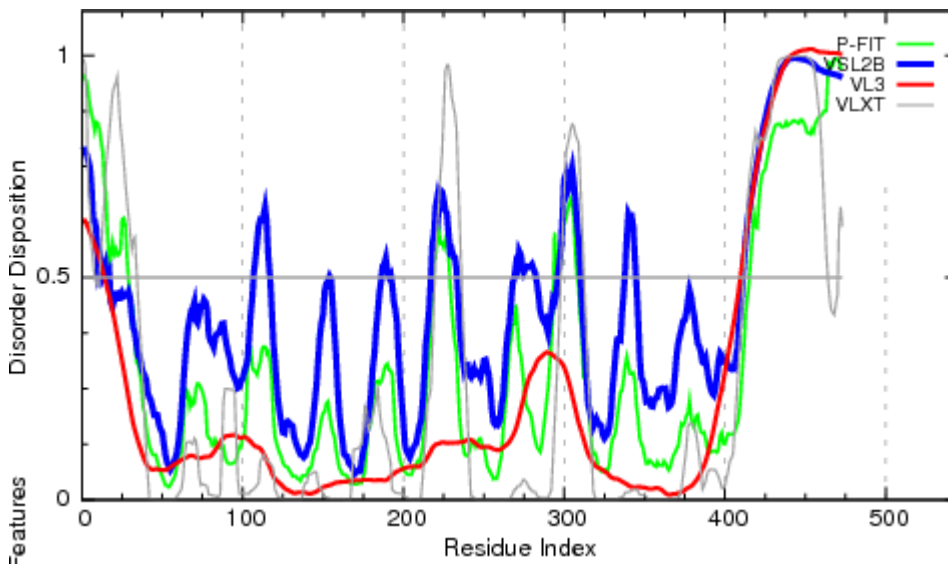

| =====PONDR VSL2 STATISTICS=====        |                                  |
|----------------------------------------|----------------------------------|
| Predicted residues: 473                | Number Disordered Regions: 11    |
| Number residues disordered: 147        | Longest Disordered Region: 62    |
| Overall percent disordered: 31.08      | Average Prediction Score: 0.4255 |
| Predicted disorder segment [1]-[12]    | Average Strength= 0.6728         |
| Predicted disorder segment [14]-[15]   | Average Strength= 0.5140         |
| Predicted disorder segment [17]-[17]   | Average Strength= 0.5080         |
| Predicted disorder segment [107]-[117] | Average Strength= 0.5893         |
| Predicted disorder segment [154]-[154] | Average Strength= 0.5021         |
| Predicted disorder segment [187]-[192] | Average Strength= 0.5213         |
| Predicted disorder segment [218]-[233] | Average Strength= 0.6169         |
| Predicted disorder segment [269]-[282] | Average Strength= 0.5254         |
| Predicted disorder segment [296]-[310] | Average Strength= 0.6447         |
| Predicted disorder segment [338]-[344] | Average Strength= 0.5982         |
| Predicted disorder segment [412]-[473] | Average Strength= 0.9104         |

## ANCHOR:

| Predicted Disordered Binding Regions |      |     |        |
|--------------------------------------|------|-----|--------|
|                                      | From | To  | Length |
| 1                                    | 399  | 411 | 13     |
| 2                                    | 455  | 473 | 19     |
| Filtered Regions                     |      |     |        |
|                                      | From | To  | Length |
| 1                                    | 290  | 290 | 1      |
| 2                                    | 393  | 394 | 2      |

## ModPred and PROSITE:

ModPred: Acetylation (K160, K467), Amidation (Y196, S197, V240, Y275, Y370, Y404), Ubiquitination (K220, K467), Proteolytic cleavage (D405, T409, D410, E419), Phosphorylation (T429, T443), Hydroxylation (P446), ADP-ribosylation (R471).

PROSITE: No identified domain recognition sites.

## Structural modelling:

| Name                                                                                                         | Title     | Identity | Method      | Oligo State | Ligands        |
|--------------------------------------------------------------------------------------------------------------|-----------|----------|-------------|-------------|----------------|
|  <a href="#">4txg.1.A</a> | Chitinase | 22.56    | X-ray, 1.8Å | monomer     | 11 x <u>CS</u> |

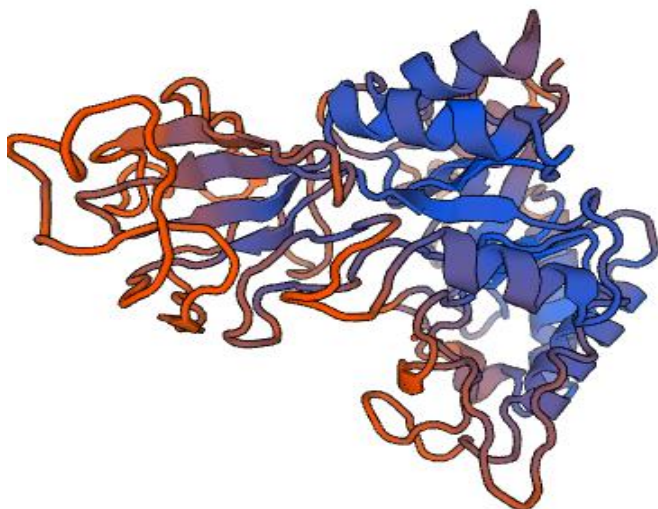

Model #1: Residues 28-413 of MVLG\_057377T0 with 4txg.1.A (22.56% sequence identity) as a template

# > MVLG\_01520T0 (31.00%)- 958 aa

**MRVGNSLAVLAAAAAIVPAAFA**QKTQVFGRYIIVYPESNKEGKALHARDHLSNLRAKSGVEPLEV  
VQEYHMPGVLVGQSVNAPGVTKEQLEKMPGVKAVYPVFDYSFAAVQQQKEEPPSQSFQQHHNHR  
KVKESGAAPPHLELRDQQFLGQKNMPNTTGGFSPHRMTSIDILHKGFFGQGVKSCFIEGHTQYTHP  
LLGKRGCFGSKNCAIQFGADLVGTDPNHPQPGDPHADCDVRSTHILGQMVAPENRFDVGAIPQA  
EIGWYSIFPCGGGGATGDIIIGAFLKAADDGCKVISNSLISSVGWNDNDLGPITLNKLAEEKGVFAVS  
AWGVSRDEGLFYPAGPATGTGEGVGAAYVDLNQYPFAYTLTFENGATLPYISVYPIPYDDSFVYFL  
STSSTDATATGCDDLPHDTPDLTNRAVVVQRASCGFETQMANVRKFGARVLLVVNYPASVGWPAP  
YFDGIAPSVFPFVGMHSDGAKLLEYRKNNSNGLKLNFKDRTLHPVNADTGGKISFYSSYGPDNSLT  
TGPTFGVPANQIAGIRPNGSVGTIDATSSPITNAIATLVLGARKNDNLKPDELRSLLATTAKPISIHPR  
DGEPLETTTLAGSLVNALRAVEAQTLPFSPFKINDTAHVQKEQQLTKNMGHASITYTFDSTAA  
QTKMTYDGGAKQDIVPSSLPTVLQEAFAKVSFDKTSITIEAGQTATVKVTITPPQLTAREKDYFPVYS  
GFINIHASNKQEFHVSFGLAADIVDMPIIDVSTSFASAFRSGLPQGLTPYLLDNSPNSVKVPTQLTT  
FDRSIGVGVFIRFAQATRHVTVDVIAGNSTFKGTLPHEGRNHRSLNAADENHLVARRLARQSRA  
DPNQLYTDVQVLGRIYEKKNQARDDKGSPPDALVVFKGSMHKDLMDGQASDLPDGMPIRVLVRA  
LKTTADPSLEASWESWVSPPVQFKS

## PONDR:

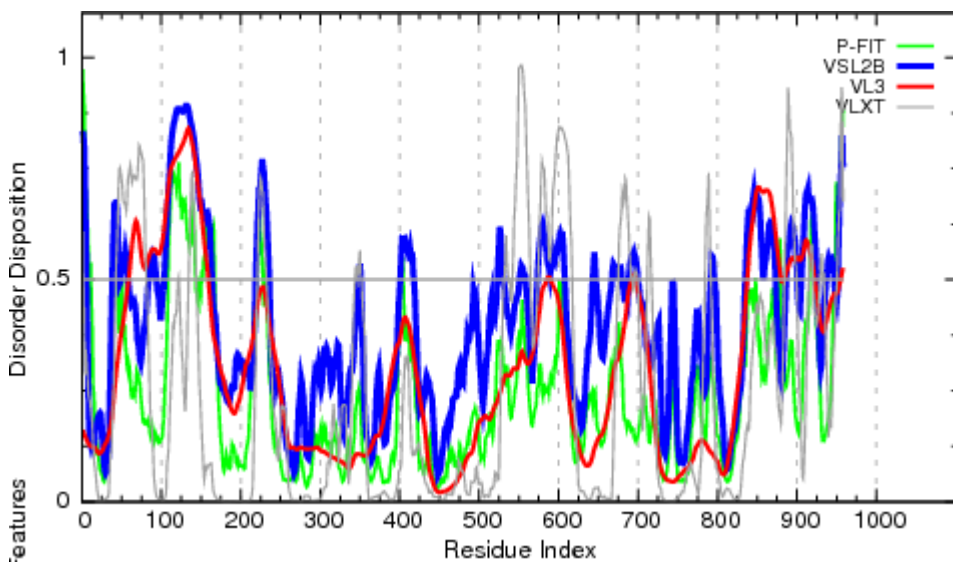

## PONDR VSL2 STATISTICS

|                                        |                                  |
|----------------------------------------|----------------------------------|
| Predicted residues: 958                | Number Disordered Regions: 21    |
| Number residues disordered: 297        | Longest Disordered Region: 60    |
| Overall percent disordered: 31.00      | Average Prediction Score: 0.3976 |
| Predicted disorder segment [1]-[5]     | Average Strength= 0.7563         |
| Predicted disorder segment [39]-[47]   | Average Strength= 0.6197         |
| Predicted disorder segment [50]-[58]   | Average Strength= 0.5426         |
| Predicted disorder segment [85]-[93]   | Average Strength= 0.5318         |
| Predicted disorder segment [104]-[163] | Average Strength= 0.7643         |
| Predicted disorder segment [219]-[235] | Average Strength= 0.6649         |
| Predicted disorder segment [349]-[351] | Average Strength= 0.5175         |
| Predicted disorder segment [401]-[417] | Average Strength= 0.5639         |
| Predicted disorder segment [524]-[530] | Average Strength= 0.5664         |
| Predicted disorder segment [551]-[558] | Average Strength= 0.5182         |

|                                        |                          |
|----------------------------------------|--------------------------|
| Predicted disorder segment [574]-[607] | Average Strength= 0.5686 |
| Predicted disorder segment [643]-[646] | Average Strength= 0.5319 |
| Predicted disorder segment [668]-[679] | Average Strength= 0.5201 |
| Predicted disorder segment [689]-[699] | Average Strength= 0.5432 |
| Predicted disorder segment [792]-[796] | Average Strength= 0.5282 |
| Predicted disorder segment [835]-[857] | Average Strength= 0.6365 |
| Predicted disorder segment [859]-[873] | Average Strength= 0.5794 |
| Predicted disorder segment [887]-[900] | Average Strength= 0.5821 |
| Predicted disorder segment [906]-[924] | Average Strength= 0.6381 |
| Predicted disorder segment [938]-[946] | Average Strength= 0.5367 |
| Predicted disorder segment [952]-[958] | Average Strength= 0.7087 |

## ANCHOR:

| Predicted Disordered Binding Regions |      |     |        |
|--------------------------------------|------|-----|--------|
|                                      | From | To  | Length |
| 1                                    | 96   | 110 | 15     |
| 2                                    | 140  | 150 | 11     |
| 3                                    | 166  | 187 | 22     |
| 4                                    | 204  | 214 | 11     |
| 5                                    | 565  | 570 | 6      |
| 6                                    | 615  | 621 | 7      |
| 7                                    | 627  | 634 | 8      |
| 8                                    | 875  | 885 | 11     |
| 9                                    | 900  | 908 | 9      |
| 10                                   | 927  | 933 | 7      |
| Filtered Regions                     |      |     |        |
|                                      | From | To  | Length |
| 1                                    | 266  | 269 | 4      |
| 2                                    | 586  | 588 | 3      |
| 3                                    | 812  | 815 | 4      |
| 4                                    | 859  | 860 | 2      |

## ModPred and PROSITE:

ModPred: Amidation (A12, I259, F392), Proteolytic cleavage(R30, Y31, D216, D254, W332, L340, Y395, R584, Y733, D923, R928), Ubiquitination (K40, K57), ADP-ribosylation (R546), O-linked glycosylation (T716), Phosphorylation (S897).

PROSITE: No identified domain recognition sites.

## Structural modelling:

| Name                                                                                                                                                            | Title | Identity | Method      | Oligo State     | Ligands                                                           |
|-----------------------------------------------------------------------------------------------------------------------------------------------------------------|-------|----------|-------------|-----------------|-------------------------------------------------------------------|
|  <a href="#">3eif.1.A</a> C5a peptidase                                        |       | 19.82    | X-ray, 1.9Å | monomer         | 1 x <u>CA</u> , 1 x <u>MLA</u>                                    |
|  <a href="#">4yn3.1.A</a> Cucumisin                                            |       | 19.24    | X-ray, 2.0Å | monomer         | 1 x <u>MAN</u> , 1 x <u>BMA</u> , 4 x <u>NAG</u> , 1 x <u>FUC</u> |
|  <a href="#">4i0w.1.B</a> Protease CspB                                        |       | 14.39    | X-ray, 1.6Å | hetero-oligomer | None                                                              |
|  <a href="#">3l xu.1.A</a> Tripeptidyl-peptidase 2                             |       | 15.80    | X-ray, 3.1Å | homo-dimer      | None                                                              |
|  <a href="#">1r6v.1.A</a> subtilisin-like serine protease                      |       | 19.59    | X-ray, 1.7Å | monomer         | 1 x <u>CA</u>                                                     |
|  <a href="#">1y9z.1.A</a> alkaline serine protease                             |       | 20.21    | X-ray, 1.4Å | monomer         | 2 x <u>CA</u> , 1 x <u>PMS</u>                                    |
|  <a href="#">4mzd.1.A</a> Nisin leader peptide-processing serine protease NisP |       | 18.84    | X-ray, 1.1Å | monomer         | None                                                              |

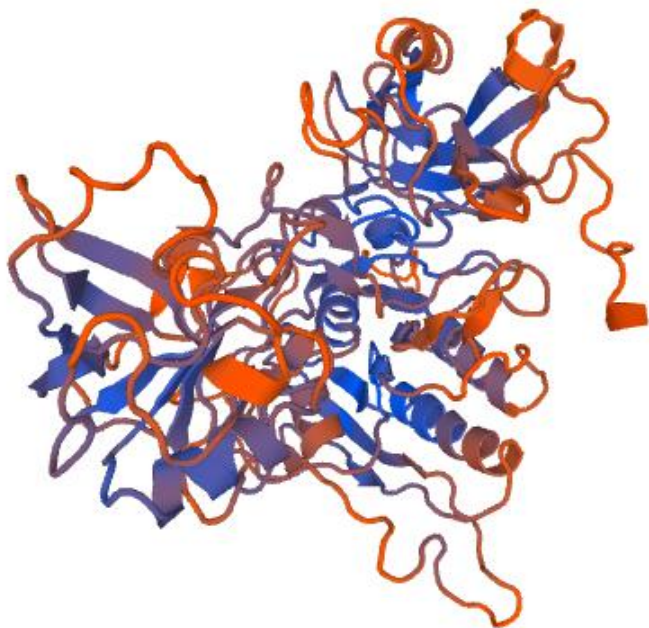

Model #1: Residues 163-766 of MVLG\_01520T0 with 3eif.1.A (19.82% sequence identity) as a template

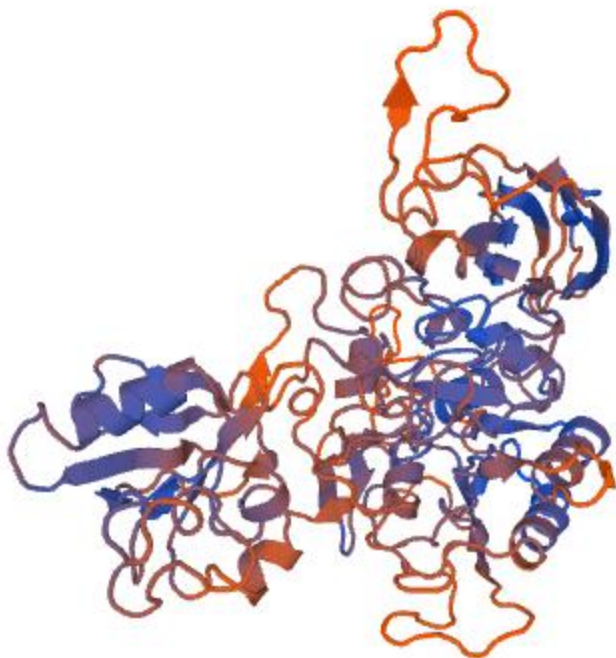

Model #2: Residues 144-754 of MVLG\_01520T0 with 4yn3.1.A (19.24% sequence identity) as a template

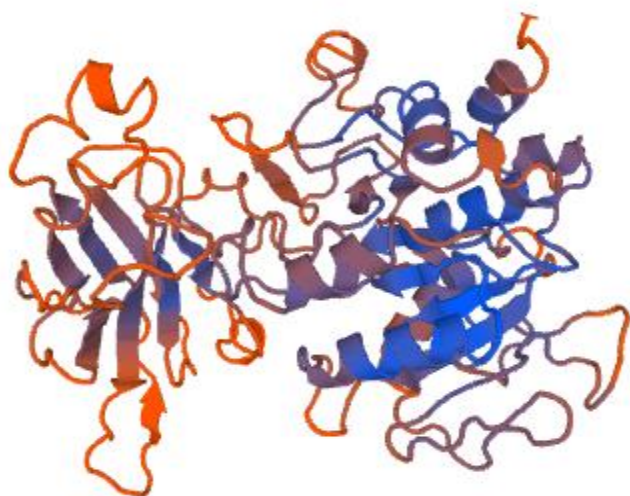

Model #3: Residues 167-629 of MVLG\_01520T0 with 4i0w.1.B (14.39% sequence identity) as a template

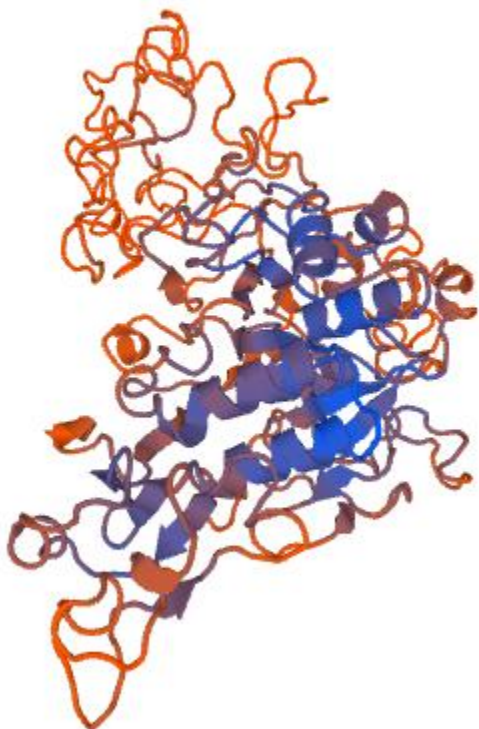

Model #4: Residues 19-626 of MVLG\_01520T0 with 1r6v.1.A (19.59% sequence identity) as a template

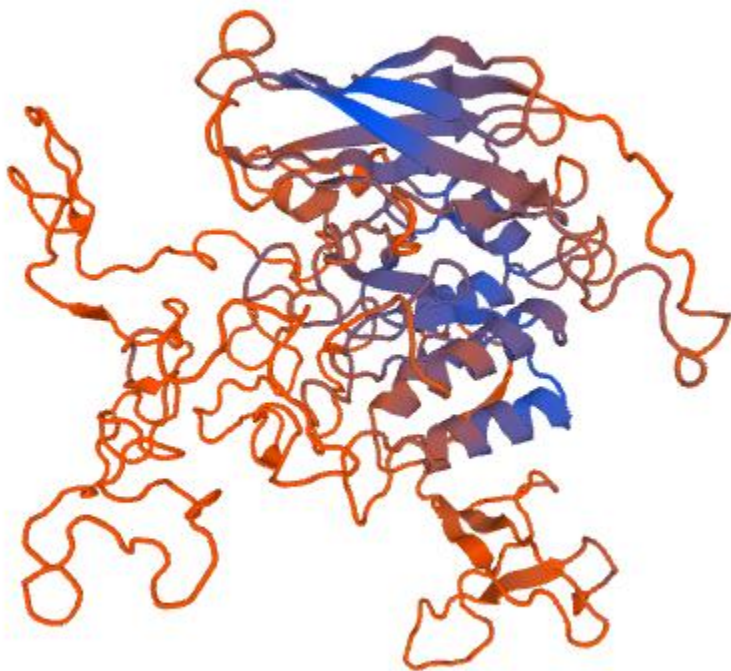

Model #5: Residues 177-755 of MVLG\_01520T0 with 3lxu.1.A (15.80% sequence identity) as a template

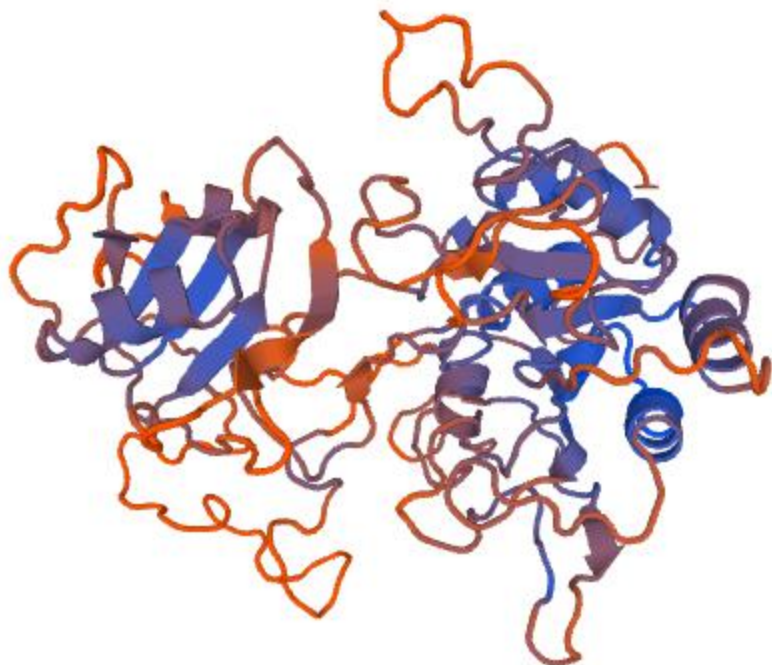

Model #6: Residues 168-629 of MVLG\_01520T0 with 1y9z.1.A (20.21% sequence identity) as a template

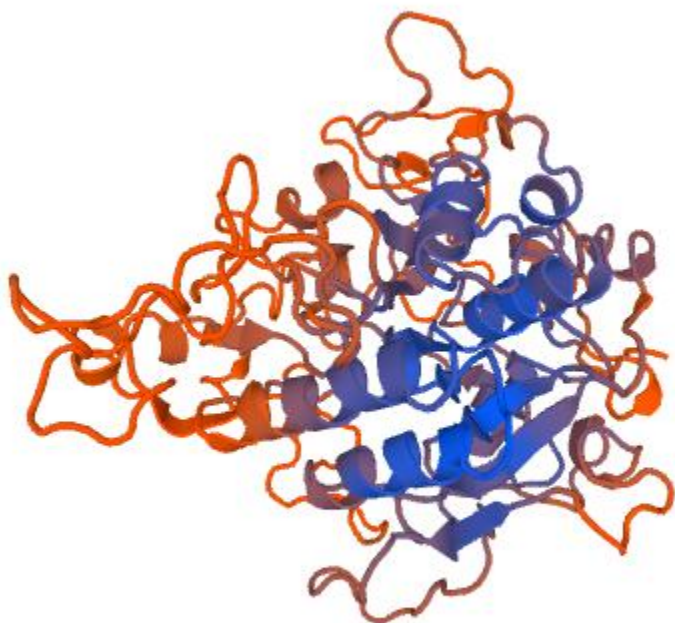

Model #7: Residues 145-627 of MVLG\_01520T0 with 4mzd.1.A (18.84% sequence identity) as a template

> MVLG\_04107T0 (30.00%)- 100 aa

**MKYSLVFVTLVLMAAINVSAI**PADLTKPTSTSSEVDKVDHPKKYAPPAVISFISKANATVARQTKD  
CCNYCLKRRRDGVKLNSCYAICLWSSGKWTTKCP

# PONDR:

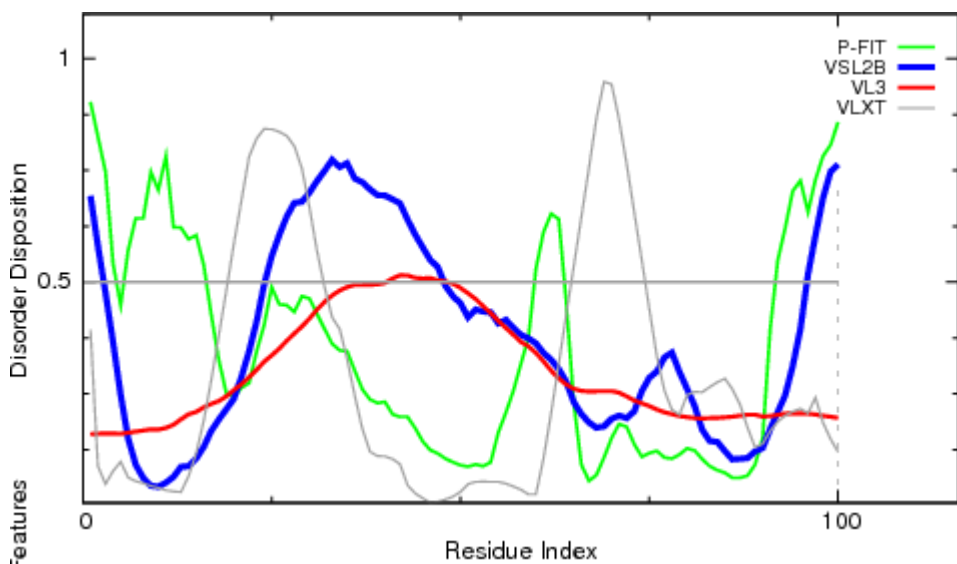

## =====PONDR VSL2 STATISTICS=====

|                                       |                                  |
|---------------------------------------|----------------------------------|
| Predicted residues: 100               | Number Disordered Regions: 3     |
| Number residues disordered: 30        | Longest Disordered Region: 23    |
| Overall percent disordered: 30.00     | Average Prediction Score: 0.3768 |
| Predicted disorder segment [1]-[2]    | Average Strength= 0.6372         |
| Predicted disorder segment [25]-[47]  | Average Strength= 0.6721         |
| Predicted disorder segment [96]-[100] | Average Strength= 0.6643         |

# ANCHOR:

| Predicted Disordered Binding Regions |      |    |        |
|--------------------------------------|------|----|--------|
|                                      | From | To | Length |
| None                                 |      |    |        |
| Filtered Regions                     |      |    |        |
|                                      | From | To | Length |
| 1                                    | 6    | 12 | 7      |

# ModPred and PROSITE:

ModPred: Proteolytic cleavage (D36, R76, D77), Disulphide linkage (C67, C71, C99), Amidation (Y70), Hydroxylation (P100).

PROSITE: No identified domain recognition sites.

## Structural modelling:

| Name                                                                                                       | Title                                      | Identity | Method      | Oligo State     | Ligands                                                                    |
|------------------------------------------------------------------------------------------------------------|--------------------------------------------|----------|-------------|-----------------|----------------------------------------------------------------------------|
|  <a href="#">3hwe.1.A</a> | Neutrophil gelatinase-associated lipocalin | 15.22    | X-ray, 2.8Å | monomer         | 2 x <a href="#">RKS</a>                                                    |
|  <a href="#">5ool.1.2</a> | 39S ribosomal protein L36, mitochondrial   | 16.22    | EM          | hetero-oligomer | 1 x <a href="#">PNS</a> , 12 x <a href="#">MG</a> , 3 x <a href="#">ZN</a> |
|  <a href="#">2yeu.2.B</a> | DR2231                                     | 23.53    | X-ray, 2.0Å | homo-dimer      | 2 x <a href="#">GD</a>                                                     |

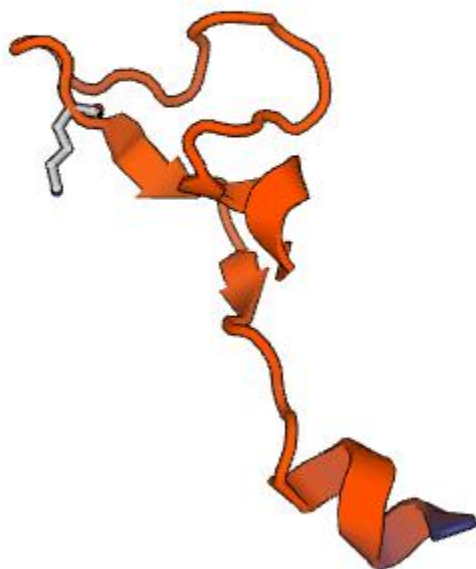

Model #1: Residues 16-56 of MVLG\_04107T0 with 2yeu.2.B (23.53% sequence identity) as a template

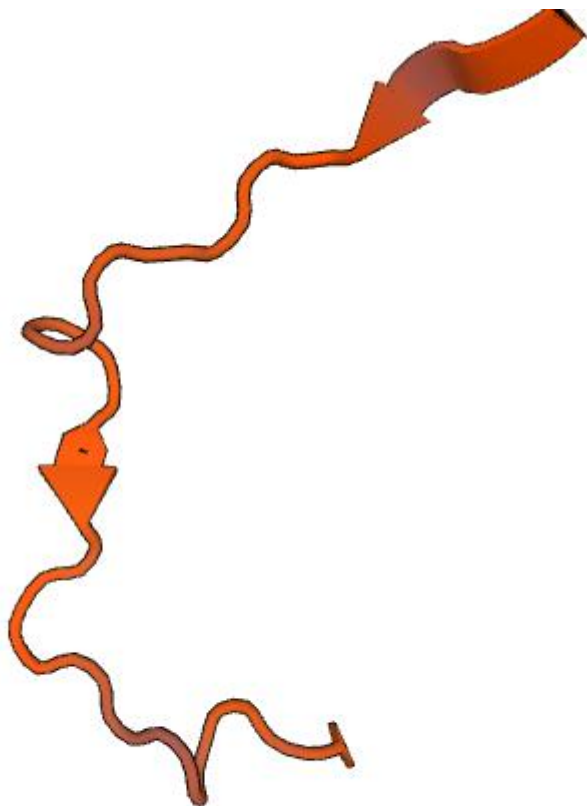

Model #2: Residues 21-46 of MVLG\_04107T0 with 3hwe.1.A (15.22% sequence identity) as a template

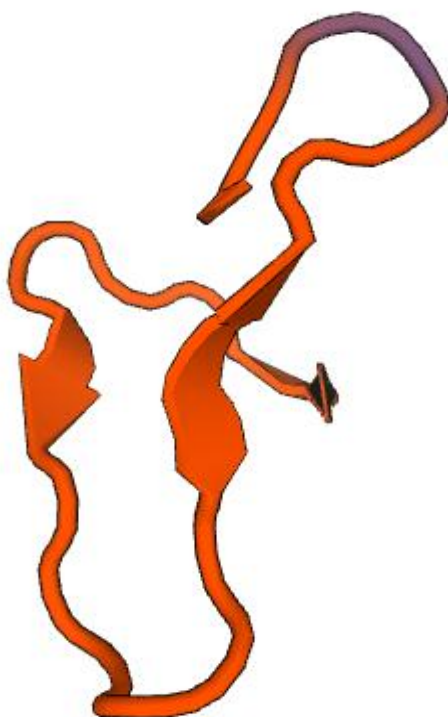

Model #3: Residues 58-80 of MVLG\_04107T0 with 5ool.1.2 (16.22% sequence identity) as a template

## Moderately disordered proteins (10-30% disordered residues by PONDR® VSL2 analysis)

> MVLG\_02763T0 (29.30%)- 976 aa

**MLVGKVS**LVILWT**ATMALA**SPSRRGNHKSTTGKRSSFSGSRYLVKLSTQTDMMKGSKVPVEQHRQ  
DCNDQIKNLSSDFFGAIKVHNTFNFAIYQCSMSVEAMEGFSPIDLADYLGVTGVDVIKVVVHGRGLS  
FPMPPPVSKLQPKGEFATPWRKNHHPLLLSPSVYRNNSFAPHVESEVHLMHNLGLLGDSNVSVCLV  
DTGVDYTNRRLGEGFGKGFKIVLGHDVFGNDGKHGPGSPYTNTCTDHGTHVTGIVGANFDPDFKFSG  
AAPEVTLGHYRAFACTGQSTEDTIAAALLRAHADGCKVITLSLGGPSAWEDGLVADAASHVTNQG  
SLVVSSAGNFGTQGLFYGDVPGELPEVLGTAATDLREYPVGYLLDFVDHSFQPIPYFAVYPVKINET  
LDVCYIPPSITDDPKCNLSTIVLPKGLKNSLLVLELGQCPHSLVAKWAVANKLRVAMVSFKPEDAQ  
SPLNYYSNHFARGIDYFLIVPHSWVETLIRYYTASRGKLQVSFAAGKRAPVEALANHESGGNMAFY  
SSYGPTATLEGFGNTLAAPGTNILSTVTVAQGGVGVMSGTSMACPLAAGIAALLFSHRKADNLTPR  
QVKSLMATTAAQPVRISQKPKDAFATVVQQGAGIVSAYRAYIAKTLIEPHSIALGDLEHFKNSHSITLK  
NTNKFVAVTYTSLSTSSQTVTTYDKSASIDINPSGIPRPGIAGAATVAFTPRSLRIPPGQSATFTATFTLP  
NFSKIDFFRVPVVSGLLIDSAGDPVPTYRIAYAGVAAGLQIMPVLDSTDVASQSYGIKGLRHPFIM  
VGNSLDPDALPSTAADVLSDPNPKVTSVSRKDGIFVFLRFAMATPYVQVDLVDANTTFIPTIPSNNNL  
HLAENNSLTGDLRKRPHNPPLFDSVSIVGTAATANELTRDPTDFSHGSGADTSFINFNGMVAVKHPD  
DPATTSVDKGRPYRLLIRARRMNSNPEFSASYDSWLSPPFQFLD

### PONDR:

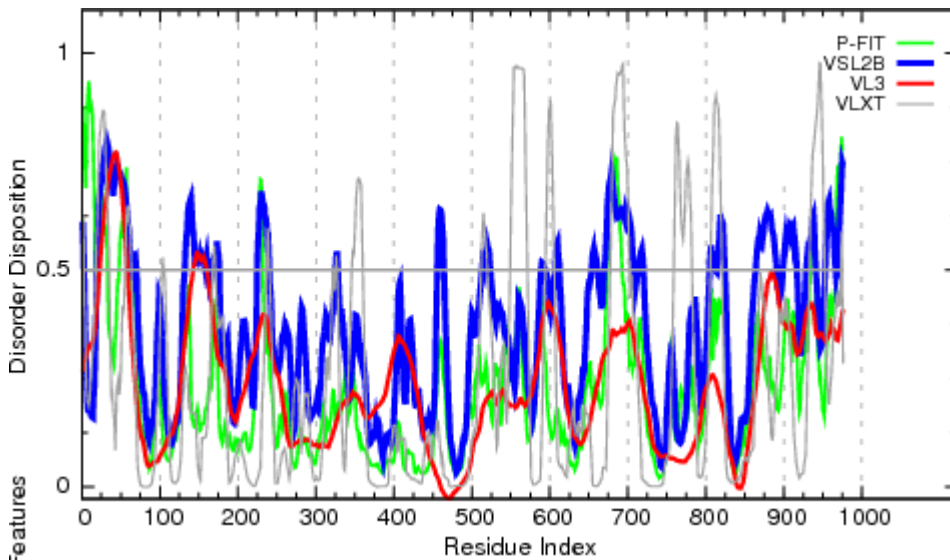

### =====PONDR VSL2 STATISTICS=====

|                                        |                                  |
|----------------------------------------|----------------------------------|
| Predicted residues: 976                | Number Disordered Regions: 23    |
| Number residues disordered: 286        | Longest Disordered Region: 44    |
| Overall percent disordered: 29.30      | Average Prediction Score: 0.3690 |
| Predicted disorder segment [1]-[2]     | Average Strength= 0.5861         |
| Predicted disorder segment [20]-[63]   | Average Strength= 0.6953         |
| Predicted disorder segment [66]-[69]   | Average Strength= 0.5239         |
| Predicted disorder segment [133]-[162] | Average Strength= 0.5575         |
| Predicted disorder segment [166]-[170] | Average Strength= 0.5125         |
| Predicted disorder segment [172]-[176] | Average Strength= 0.5355         |
| Predicted disorder segment [225]-[240] | Average Strength= 0.6081         |

|                                        |                          |
|----------------------------------------|--------------------------|
| Predicted disorder segment [326]-[328] | Average Strength= 0.5265 |
| Predicted disorder segment [456]-[464] | Average Strength= 0.5943 |
| Predicted disorder segment [513]-[523] | Average Strength= 0.5317 |
| Predicted disorder segment [589]-[591] | Average Strength= 0.5126 |
| Predicted disorder segment [608]-[612] | Average Strength= 0.5391 |
| Predicted disorder segment [654]-[660] | Average Strength= 0.5248 |
| Predicted disorder segment [670]-[707] | Average Strength= 0.6281 |
| Predicted disorder segment [714]-[720] | Average Strength= 0.5272 |
| Predicted disorder segment [805]-[812] | Average Strength= 0.5269 |
| Predicted disorder segment [815]-[824] | Average Strength= 0.5722 |
| Predicted disorder segment [865]-[891] | Average Strength= 0.5827 |
| Predicted disorder segment [899]-[916] | Average Strength= 0.5697 |
| Predicted disorder segment [929]-[941] | Average Strength= 0.5631 |
| Predicted disorder segment [954]-[966] | Average Strength= 0.6000 |
| Predicted disorder segment [968]-[968] | Average Strength= 0.5005 |
| Predicted disorder segment [970]-[976] | Average Strength= 0.6613 |

## ANCHOR:

| Predicted Disordered Binding Regions |      |     |        |
|--------------------------------------|------|-----|--------|
|                                      | From | To  | Length |
| 1                                    | 889  | 894 | 6      |
| 2                                    | 918  | 926 | 9      |
| Filtered Regions                     |      |     |        |
|                                      | From | To  | Length |
| 1                                    | 1    | 16  | 16     |
| 2                                    | 42   | 43  | 2      |
| 3                                    | 216  | 219 | 4      |
| 4                                    | 832  | 839 | 8      |
| 5                                    | 946  | 949 | 4      |
| 6                                    | 974  | 976 | 3      |

## ModPred and PROSITE:

ModPred: Amidation (A19, F131, N392, F652, F709, R953), Proteolytic cleavage (R34, R41, D110, D222, Y527, R715, D781, K828, D888, D965), Acetylation (K213), Ubiquitination (K229, K456), Sumoylation (K259), O-linked glycosylation (S694), ADP-ribosylation (R698)

PROSITE: Subtilase\_ASP (193-204, PROSITE entry PS00136), Subtilase\_HIS (242-252, PROSITE Entry PS00137), Subtilase\_SER (566-576, PROSITE PS00138)

## Structural modelling:

| Name                                                                                                                                                           | Title | Identity | Method                      | Oligo State                    | Ligands |
|----------------------------------------------------------------------------------------------------------------------------------------------------------------|-------|----------|-----------------------------|--------------------------------|---------|
|  <a href="#">3eif.1.A</a> C5a peptidase                                        |       | 22.10    | X-ray, 1.9Å monomer         | 1 x <u>CA</u> , 1 x <u>MLA</u> |         |
|  <a href="#">4i0w.1.B</a> Protease CspB                                        |       | 20.42    | X-ray, 1.6Å hetero-oligomer | None                           |         |
|  <a href="#">3lxu.1.A</a> Tripeptidyl-peptidase 2                              |       | 18.67    | X-ray, 3.1Å homo-dimer      | None                           |         |
|  <a href="#">1r6v.1.A</a> subtilisin-like serine protease                      |       | 22.94    | X-ray, 1.7Å monomer         | 1 x <u>CA</u>                  |         |
|  <a href="#">1y9z.1.A</a> alkaline serine protease                             |       | 20.58    | X-ray, 1.4Å monomer         | 2 x <u>CA</u> , 1 x <u>PMS</u> |         |
|  <a href="#">4mzd.1.A</a> Nisin leader peptide-processing serine protease NisP |       | 21.30    | X-ray, 1.1Å monomer         | None                           |         |

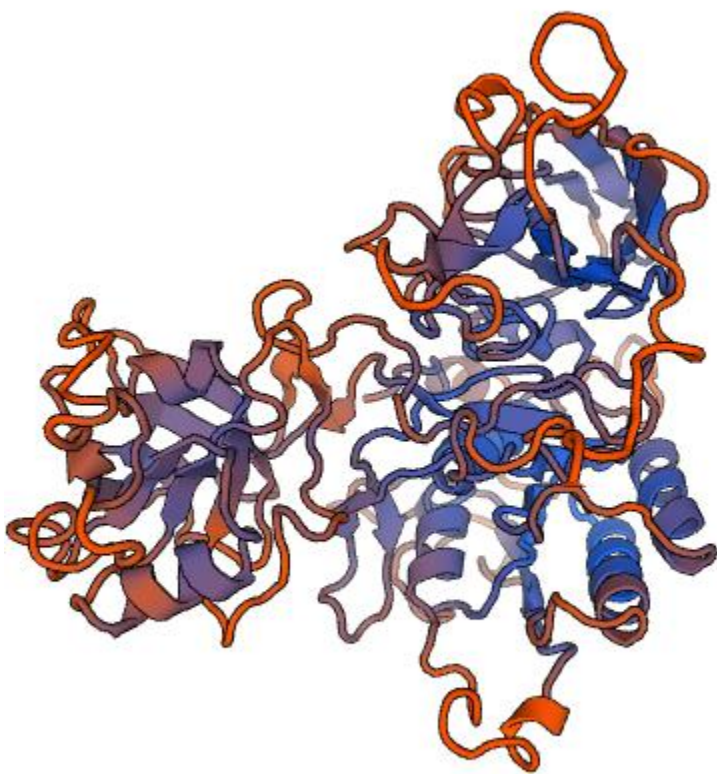

Model #1: Residues 172-780 of MVLG\_02763T0 with 3eif.1.A (22.10% sequence identity) as a template

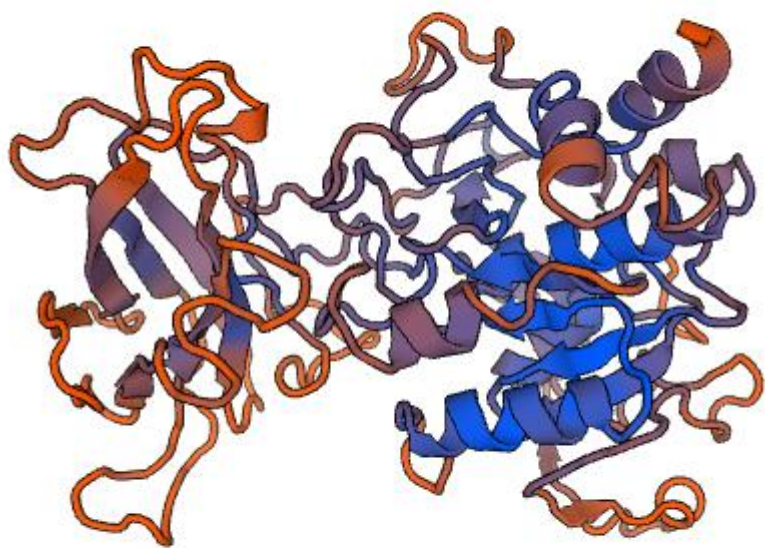

Model #2: Residues 172-639 of MVLG\_02763T0 with 4i0w.1.B (20.42% sequence identity) as a template

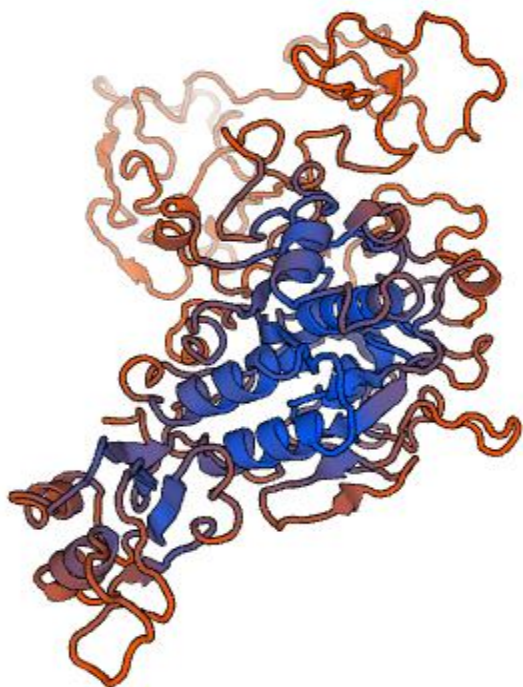

Model #3: Residues 34-637 of MVLG\_02763T0 with 1r6v.1.A (22.94% sequence identity) as a template

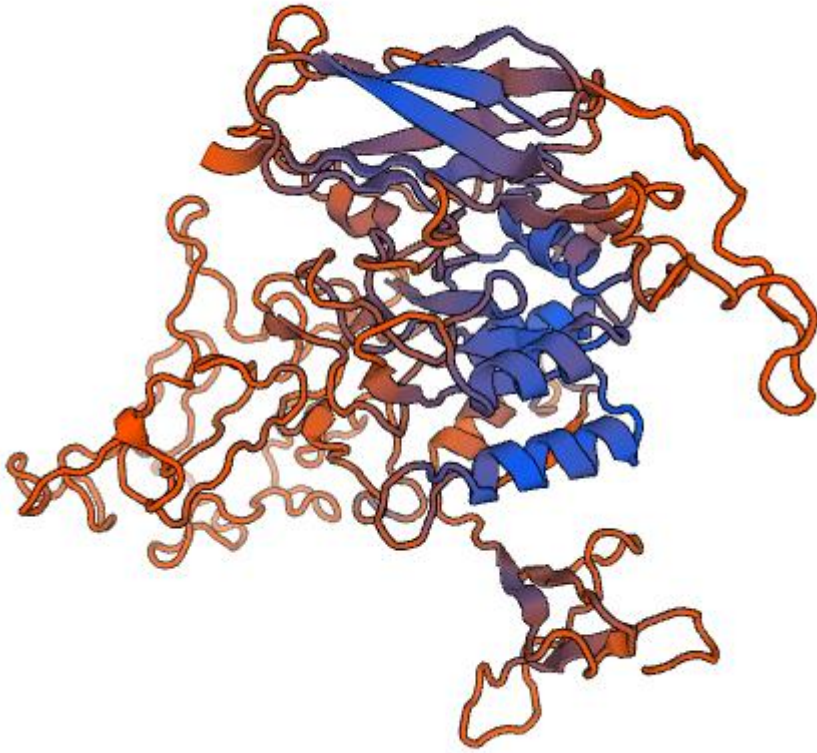

Model #4: Residues 185-770 of MVLG\_02763T0 with 3lxu.1.A (18.67% sequence identity) as a template

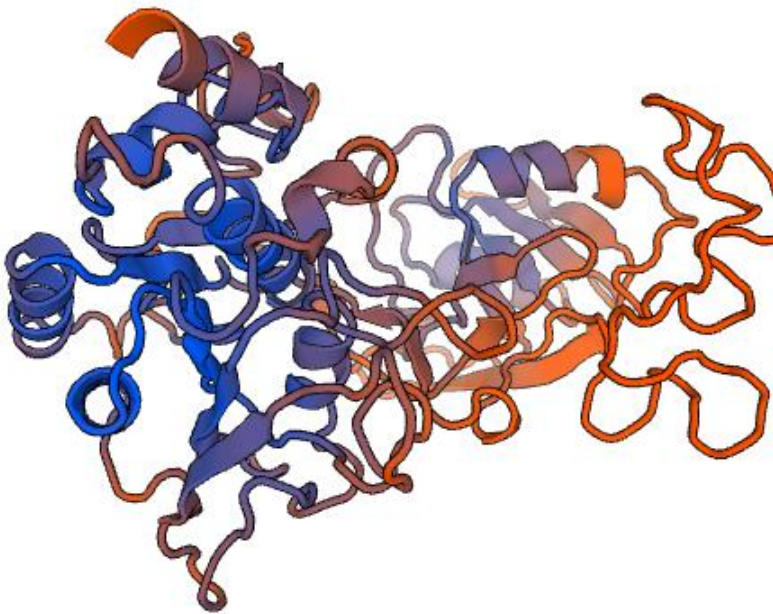

Model #5: Residues 177-639 of MVLG\_02763T0 with 1y9z.1.A (20.58% sequence identity) as a template

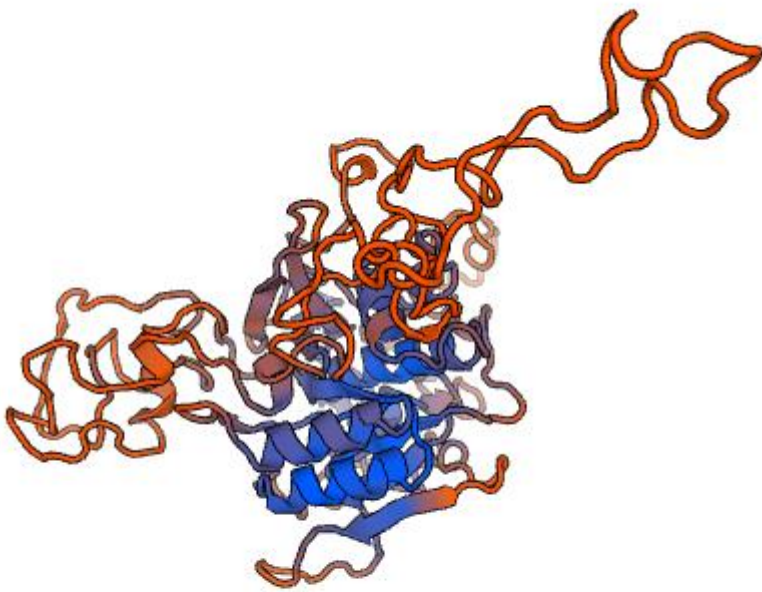

Model #6: Residues 144-638 of MVLG\_02763T0 with 4mzd.1.A (21.30% sequence identity) as a template

# > MVLG\_03994T0 (28.32%)- 618 aa

**MRKAFSFFALLYATSWARA**QVLRPHPLHDSISSSDQIHPRGLEDYFLDKKRLSAALDLLDEEHIMW  
SGDETPAGDFPVATMHFETHSKEKVLNMQRFSRLISGVSCGVGRIYITFKSRVAFDYAAQAWDWVH  
LHPEHVFTLLAHWRDCMNPDPGFIPFHFKA VPEASTLTITLEGIEVAWEEAGHTFTLHVGSGLREG  
EELQNTATKELEVPSHFTEVAHPLPAPNAGPLLEERFHIGHLNFKLPDPSVSRSGYSVHLDHKYNG  
EMVSKHHLGQNGYEATSHCINCSSGRIDISFRLRIKWFDIKEMGIYATAFNVGARLQWDLCLKANT  
IASLDFGGNIFEPLPGLGLEIHKIFKLGLIASVGVGIGCRNYTGHEMSHGIQFRIQDGAEAHIDLK  
GIGGNHWRPQVWSAPLHIEGKVKANPAASAGSTVGFEMELFKTTLAAGLRISAPSAVFLVKLNDA  
NKGPCGQRLHRRSIQVDAILLAYLGMSGGLNGAFAGSEPIGKRGLIDGGVHTSKNNQTRRERLLDM  
SWMEPNFTEEEFREFLESNDVDVSAHAAHLNSSKHS�HPRRLGLFANLPIYHHSWPLIKELCPIGPH  
VPLQKRSHPRDLLIGP

## PONDR:

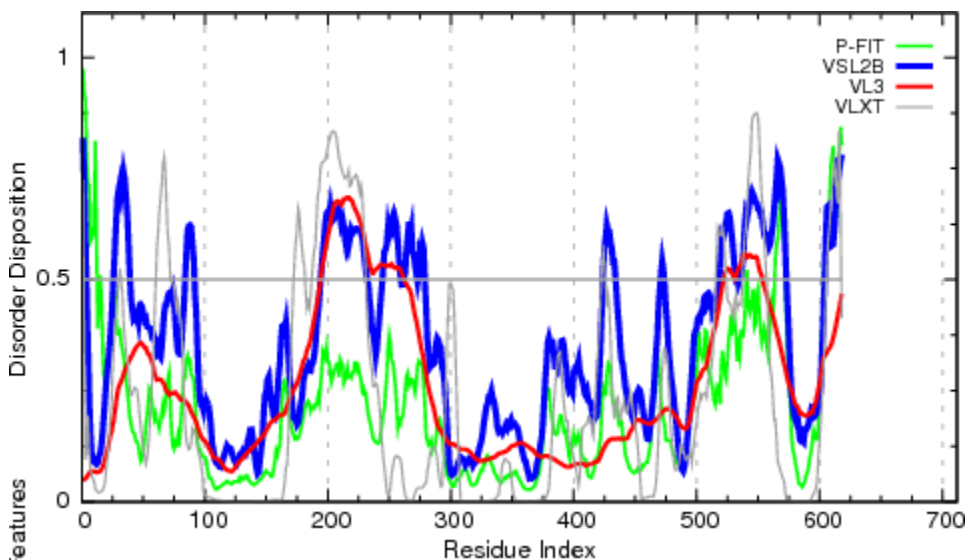

## =====PONDR VSL2 STATISTICS=====

|                                        |                                  |
|----------------------------------------|----------------------------------|
| Predicted residues: 618                | Number Disordered Regions: 12    |
| Number residues disordered: 175        | Longest Disordered Region: 38    |
| Overall percent disordered: 28.32      | Average Prediction Score: 0.3560 |
| Predicted disorder segment [1]-[3]     | Average Strength= 0.7133         |
| Predicted disorder segment [26]-[39]   | Average Strength= 0.6514         |
| Predicted disorder segment [85]-[91]   | Average Strength= 0.5943         |
| Predicted disorder segment [195]-[232] | Average Strength= 0.6078         |
| Predicted disorder segment [245]-[259] | Average Strength= 0.5904         |
| Predicted disorder segment [262]-[272] | Average Strength= 0.5630         |
| Predicted disorder segment [274]-[279] | Average Strength= 0.5489         |
| Predicted disorder segment [424]-[434] | Average Strength= 0.5695         |
| Predicted disorder segment [471]-[473] | Average Strength= 0.5258         |
| Predicted disorder segment [519]-[533] | Average Strength= 0.5848         |
| Predicted disorder segment [536]-[573] | Average Strength= 0.6425         |
| Predicted disorder segment [605]-[618] | Average Strength= 0.6718         |

## ANCHOR:

| Predicted Disordered Binding Regions |      |    |        |
|--------------------------------------|------|----|--------|
|                                      | From | To | Length |
| None                                 |      |    |        |

| Filtered Regions |      |     |        |
|------------------|------|-----|--------|
|                  | From | To  | Length |
| 1                | 236  | 240 | 5      |
| 2                | 486  | 492 | 7      |
| 3                | 579  | 579 | 1      |

### ModPred and PROSITE:

ModPred: Sumoylation (K3), Amidation (A4, L353, Y376, N407, Y491, Y585), Proteolytic cleavage (D29, R530, R608), Ubiquitination (K263, K271, K426, K568).

PROSITE: No identified domain recognition sites.

### Structural modelling:

| Name                                                                                                                                                        | Title | Identity | Method      | Oligo State | Ligands                         |
|-------------------------------------------------------------------------------------------------------------------------------------------------------------|-------|----------|-------------|-------------|---------------------------------|
|  <a href="#">1p1g.1.A</a> PROTEIN (MACROPHAGE MIGRATION INHIBITORY FACTOR) |       | 10.29    | X-ray, 2.5Å | homo-trimer | None                            |
|  <a href="#">3iq2.1.A</a> Sorting nexin-7                                  |       | 28.00    | X-ray, 1.7Å | monomer     | 1 x <u>GOL</u> , 6 x <u>SO4</u> |

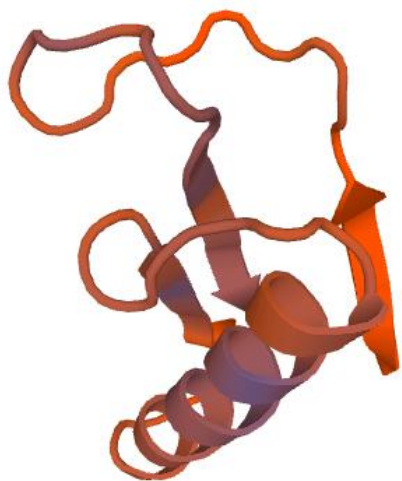

Model #1: Residues 53-121 of MVLG\_03994T0 with 1p1g.1.A (10.29% sequence identity) as a template

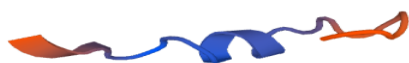

Model #2: Residues 536-556 of MVLG\_03994T0 with 3iq2.1.A (28.00% sequence identity) as a template

# >MVLG\_01159T0 (27.49%)- 502 aa

**MHGNYLRLLLSILICQVIA**KWYKYDTGDHRIPRRHRGVDLRGRHHASGVVLGGDFSSNIETANQT  
 IQIDELRQTTDTKGENEDLQVSDQEGNGSSFDESDKASNGRIISGPPRYVNPVREKYLRIDMRSKG  
 FTLDEEPFRVVGINIWLCNDENVLGVKPGTPTQKRRIREALAAAVAMGANTVRVGSCGISLGYAD  
 ALQPDQHHRAAPRSPAMDIHDYAIYAAGRYGLKIILPLMDNYDYHGGKYTVLKWLGISAEHNGA  
 NFFTDPRAIAFFKSYIEFVLNRKNPYTMRTYGEDPVVSIIEDGNEFGAYKGSEGYPPPLAFTDEIAAQV  
 KKFAPQALFMDGTDGFFNLTAHLQAPGLRSKAVDIVTDHPYPRDIPLLQMQAFLARISGKAFILGEM  
 DWVPSAPSRNPPSRLVEPSLSAYLNVLD RYPNIGVLAWSLFVHTDDCRDWVRHHDGYEMYYPPLPQ  
 DTAEKQANVLT LVQWFYARTGREVPSLLPYQTCPQEEF

## PONDR:

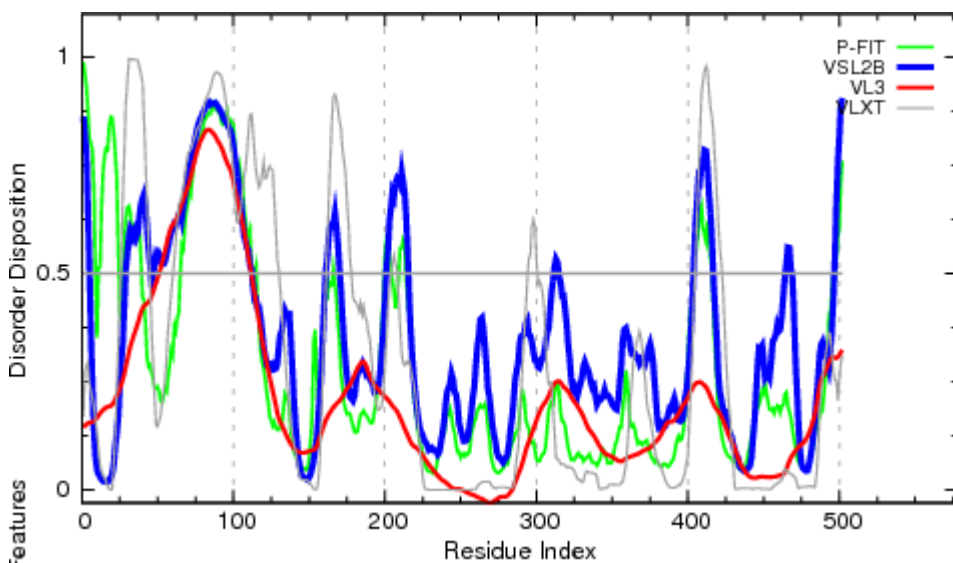

## PONDR VSL2 STATISTICS

|                                        |                                  |
|----------------------------------------|----------------------------------|
| Predicted residues: 502                | Number Disordered Regions: 9     |
| Number residues disordered: 138        | Longest Disordered Region: 65    |
| Overall percent disordered: 27.49      | Average Prediction Score: 0.3579 |
| Predicted disorder segment [1]-[5]     | Average Strength= 0.7244         |
| Predicted disorder segment [29]-[45]   | Average Strength= 0.5999         |
| Predicted disorder segment [48]-[112]  | Average Strength= 0.7189         |
| Predicted disorder segment [161]-[170] | Average Strength= 0.5798         |
| Predicted disorder segment [201]-[215] | Average Strength= 0.6589         |
| Predicted disorder segment [312]-[314] | Average Strength= 0.5251         |
| Predicted disorder segment [404]-[416] | Average Strength= 0.6889         |
| Predicted disorder segment [465]-[468] | Average Strength= 0.5394         |
| Predicted disorder segment [497]-[502] | Average Strength= 0.7601         |

## ANCHOR:

| Predicted Disordered Binding Regions |      |    |        |
|--------------------------------------|------|----|--------|
|                                      | From | To | Length |
| None                                 |      |    |        |

| Filtered Regions |      |     |        |
|------------------|------|-----|--------|
|                  | From | To  | Length |
| 1                | 9    | 23  | 15     |
| 2                | 55   | 55  | 1      |
| 3                | 107  | 111 | 5      |
| 4                | 144  | 153 | 10     |

### ModPred and PROSITE:

ModPred: Amidation (A8, V55, L723, Y752, D770, D955, Y1022), Proteolytic cleavage (R62, K160, R283, R286, D322, K326, Y329, S330, D407, R562, R565, D568, T897, P931), Carboxylation (E99, E106, E107, E109, E113, E117, E118, E121, E122), O-linked glycosylation (T169, T170, T171T178, T180, T182, T186, S190, T192, T196, T197, T198, T199, T200, T201, T202, T203, T204, T205, T206), Hydroxylation (P189), Nlinked glycosylation (N397), Phosphorylation (T692), Disulphide linkage (C1025).

PROSITE: No identified domain recognition sites.

### Structural modelling:

| Name                                                                                                        | Title                                | Identity | Method      | Oligo State | Ligands                                          |
|-------------------------------------------------------------------------------------------------------------|--------------------------------------|----------|-------------|-------------|--------------------------------------------------|
|  <a href="#">1uuq.1.A</a>  | MANNOSYL-OLIGOSACCHARIDE GLUCOSIDASE | 16.91    | X-ray, 1.5Å | monomer     | None                                             |
|  <a href="#">4xzw.1.A</a> | endo-glucanase chimera C10           | 16.92    | X-ray, 1.5Å | monomer     | 2 x <a href="#">O4B</a> , 1 x <a href="#">CA</a> |

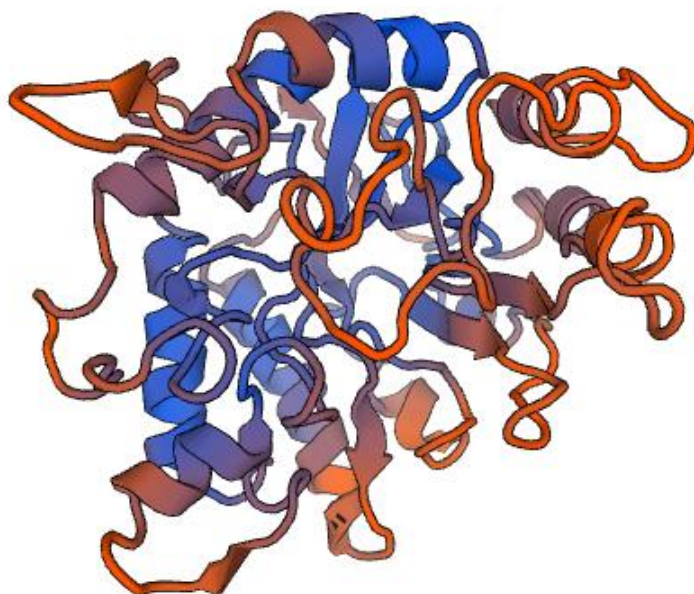

Model #1: Residues 122-485 of MVLG\_01159T0 with 1uuq.1.A (16.91% sequence identity) as a template

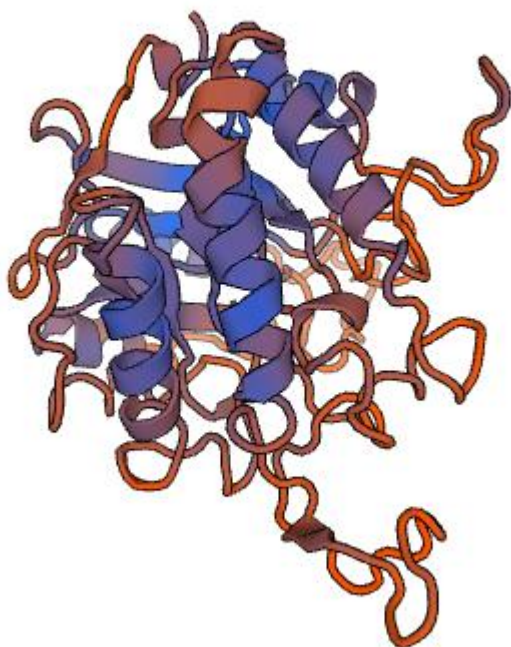

Model #2: Residues 116-445 of MVLG\_01159T0 with 4xzw.1.A (16.92% sequence identity) as a template

# >MVLG\_07010T0 (27.04%)- 159 aa

**MLFKLPVVLAMALLTLGAS**SERFTVTSLRRRDKPGDYPQDRGSVKSPAEGQQLKVGTLFPFRFN  
PISVGDLVDTLDVEVFLKIKSLNYSRRLVTNLMSPGGNKPIVQNFIVMHPKGSIVKRGTIMPGTIEVFE  
QQNGTKANGNGKYFLNQAVGVTFQF

## PONDR:

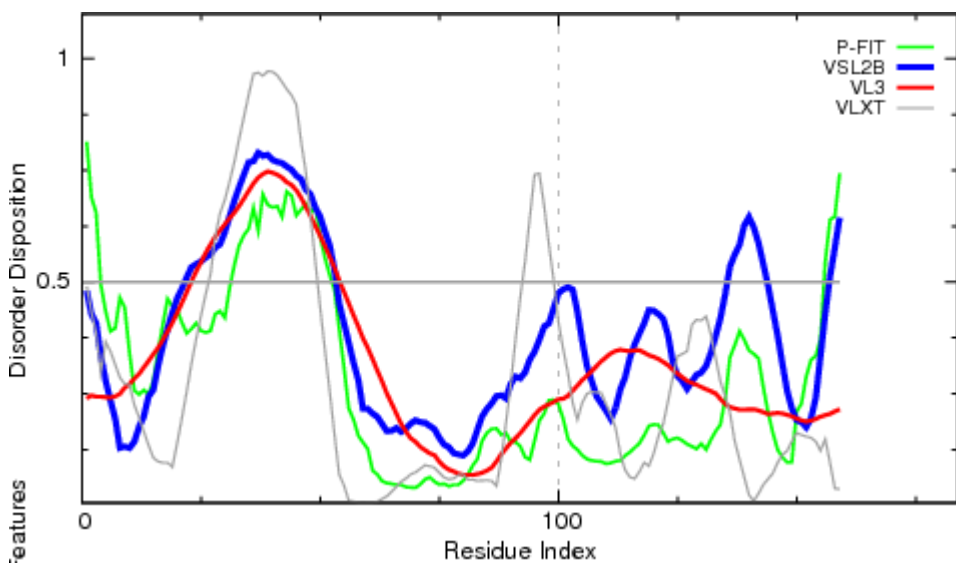

| =====PONDR VSL2 STATISTICS=====        |                                  |
|----------------------------------------|----------------------------------|
| Predicted residues: 159                | Number Disordered Regions: 3     |
| Number residues disordered: 43         | Longest Disordered Region: 32    |
| Overall percent disordered: 27.04      | Average Prediction Score: 0.3847 |
| Predicted disorder segment [22]-[53]   | Average Strength= 0.6694         |
| Predicted disorder segment [136]-[143] | Average Strength= 0.5874         |
| Predicted disorder segment [157]-[159] | Average Strength= 0.5780         |

## ANCHOR:

| Predicted Disordered Binding Regions |      |    |        |
|--------------------------------------|------|----|--------|
|                                      | From | To | Length |
| None                                 |      |    |        |

## ModPred and PROSITE:

ModPred: Proteolytic cleavage (R23, T27, S28, R30, R32, R42, K46), ADP-ribosylation (R122), Acetylation (K146), Amidation (Y147).

PROSITE: No identified domain recognition sites.

## Structural modelling:

| Name                                                                                                       | Title                         | Identity | Method      | Oligo State         | Ligands                                      |
|------------------------------------------------------------------------------------------------------------|-------------------------------|----------|-------------|---------------------|----------------------------------------------|
|  <a href="#">5i4q.1.A</a> | Contact-dependent inhibitor A | 22.45    | X-ray, 2.3Å | hetero-oligomer 2 x | <a href="#">SO4</a> , 2 x <a href="#">CL</a> |

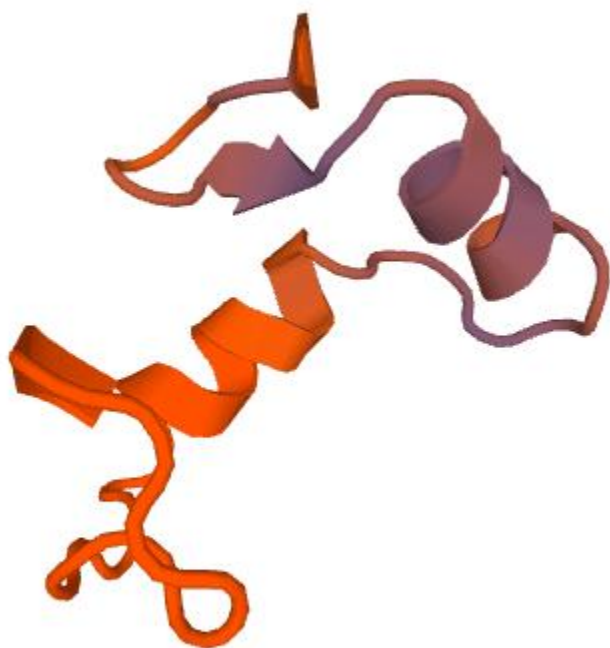

Model #1: Residues 81-129 of MVLG\_07010T0 with 5i4q.1.A (22.45% sequence identity) as a template

# > MVLG\_01192T0 (23.84%)- 495 aa

**MLRSYLLLVSLVHDA**AA~~SWY~~EAA~~SRL~~DDTVQ~~PWN~~RSC~~PRR~~VRAQAELLRGVWRDSNGDRISFD  
 LRKRNLEQDFDFVEPAPDFLGLPPLGTAVSSARSARNFAVRPRATGGQGTDYLGTA~~PNSS~~ASAVDT  
 IQPEASIIIDGPPASFQSGSYLEVDPSTGLTLDGEPFRPVGPRLCNDESLSCLPRGY~~YTD~~KSRIREAL  
 AA~~AV~~AMGANTIRINSCGISTGFPQAVQPSLHTYGTDEQLDIHDYVIYAAGEYGLKVLPLTDNYDYY  
 HGGKYTFLRWLNVP~~TD~~NAGAQQFTDRQVRRAFKRYIKFLLTRVNQYNGLAYGEDPTIAIIEDGNEF  
 GAYMGKEGFPPLSFTEDIAKYVKSLAPQALLMDGTDG~~FYN~~YTTKAVAPGVTSPYVDIVTDHAYPRN  
 IALLKRQVDIAHSNGKVFLIGEMDWTPNNGGADFGAYLNL~~LYN~~KSVGVMAWSLFTHTDTPCSSYV  
 IHDDAYSIIYPNGGQHLTLILLQSSGAEGF

## PONDR:

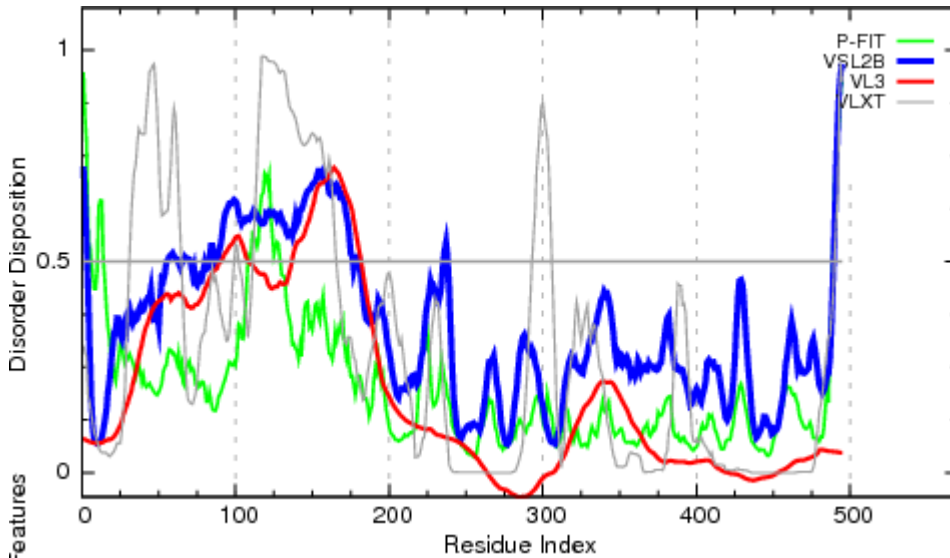

## =====PONDR VSL2 STATISTICS=====

|                                        |                                  |
|----------------------------------------|----------------------------------|
| Predicted residues: 495                | Number Disordered Regions: 8     |
| Number residues disordered: 118        | Longest Disordered Region: 88    |
| Overall percent disordered: 23.84      | Average Prediction Score: 0.3486 |
| Predicted disorder segment [1]-[3]     | Average Strength= 0.6444         |
| Predicted disorder segment [56]-[62]   | Average Strength= 0.5107         |
| Predicted disorder segment [66]-[70]   | Average Strength= 0.5060         |
| Predicted disorder segment [83]-[86]   | Average Strength= 0.5228         |
| Predicted disorder segment [89]-[176]  | Average Strength= 0.6229         |
| Predicted disorder segment [179]-[180] | Average Strength= 0.5117         |
| Predicted disorder segment [236]-[238] | Average Strength= 0.5279         |
| Predicted disorder segment [490]-[495] | Average Strength= 0.8299         |

## ANCHOR:

| Predicted Disordered Binding Regions |      |     |        |
|--------------------------------------|------|-----|--------|
|                                      | From | To  | Length |
| None                                 |      |     |        |
| Filtered Regions                     |      |     |        |
|                                      | From | To  | Length |
| 1                                    | 136  | 140 | 5      |

## ModPred and PROSITE:

ModPred: Amidation (A16, M450, Y471, Y475, Q488), Pyrrolidone carboxylic acid (Q45), Proteolytic cleavage (R97, W452), Methylation (K256, K301).

PROSITE: No identified domain recognition sites.

## Structural modelling:

| Name                                                                                                                                                      | Title | Identity | Method      | Oligo State | Ligands                 |
|-----------------------------------------------------------------------------------------------------------------------------------------------------------|-------|----------|-------------|-------------|-------------------------|
|  <a href="#">1rh9.1.A</a> endo-beta-mannanase                             |       | 24.92    | X-ray, 1.5Å | monomer     | None                    |
|  <a href="#">2zun.1.A</a> 458aa long hypothetical endo-1,4-beta-glucanase |       | 17.99    | X-ray, 2.0Å | monomer     | 2 x <a href="#">CBI</a> |
|  <a href="#">4cu6.1.A</a> BETA-GALACTOSIDASE                              |       | 19.29    | X-ray, 2.7Å | monomer     | None                    |

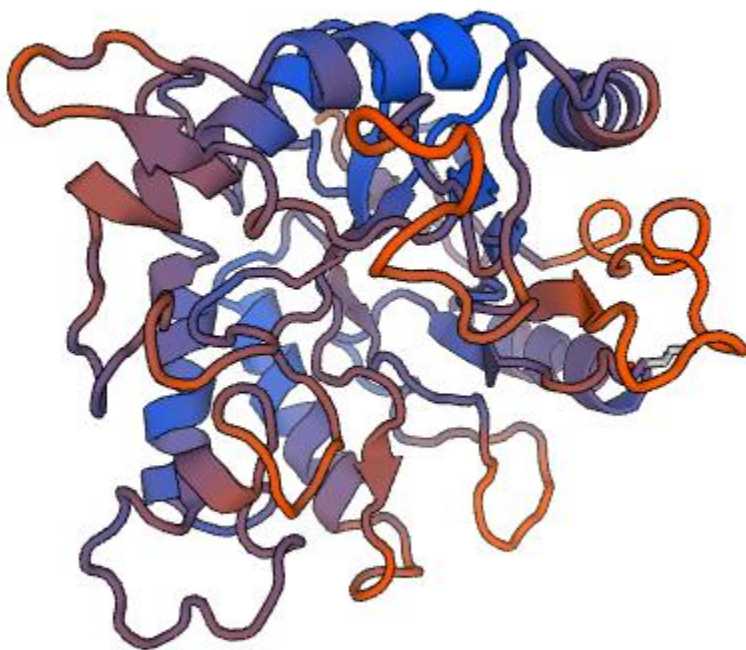

Model #1: Residues 153-491 of MVLG\_01192T0 with 1rh9.1.A (24.92% sequence identity) as a template

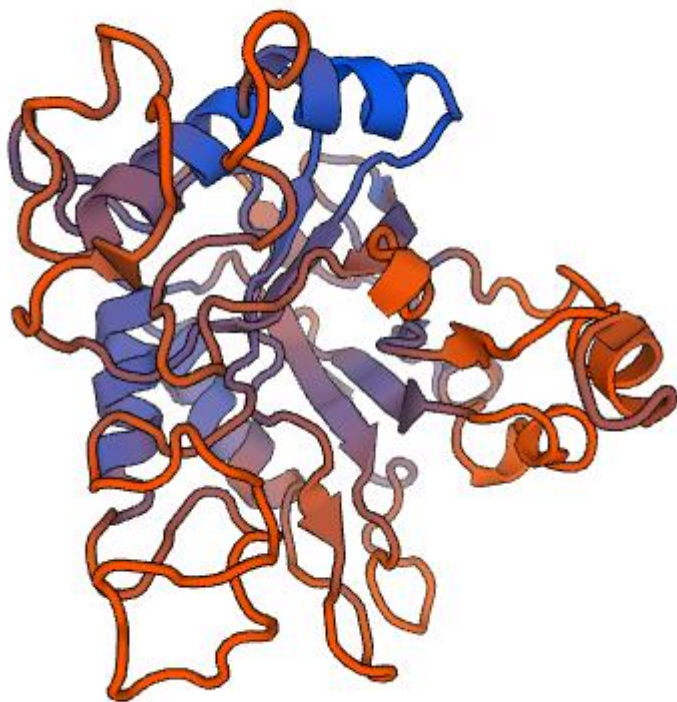

Model #2: Residues 151-457 of MVLG\_01192T0 with 2zun.1.A (17.99% sequence identity) as a template

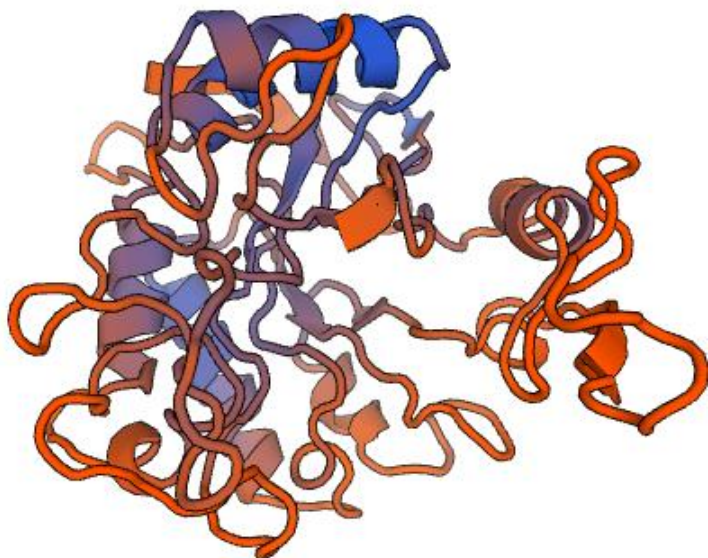

Model #3: Residues 152-457 of MVLG\_01192T0 with 4cu6.1.A (19.29% sequence identity) as a template

## > MVLG\_05108T0 (23.69%)- 363 aa

**MLCKLSLVLILASSFWVALA**TPPAACTIVSSTDIPKVQKCKVITIMAFIMPAGQTLMLDVQAGTTIN  
QLGDIIFEHRGPWRGPLMSIYGDSITYNGNNKKLYCNGQMYWDGMGVTGTTKPGPALSLITGTVS  
DLIIHNSPLNAVVEANGKTLASNIFVNNTDGD RMGGHNTDGFNVVQKTRDLTISGCTVINQDDCISI  
TSGQGITISQNTCKNGHGISIGSIKSNEHVSQVTISQNHVENSQQGYRIKTYSGATRGSDNITFHGNT  
GNGLTHYGVVVEQDYTESGPKGPSFATNGVLISNIRFVGPITTL SMAGDKAQKVYVLCGVNSCIGD  
WDWSSLKFTRGGS LGSITRAPIRGLTA

## PONDR:

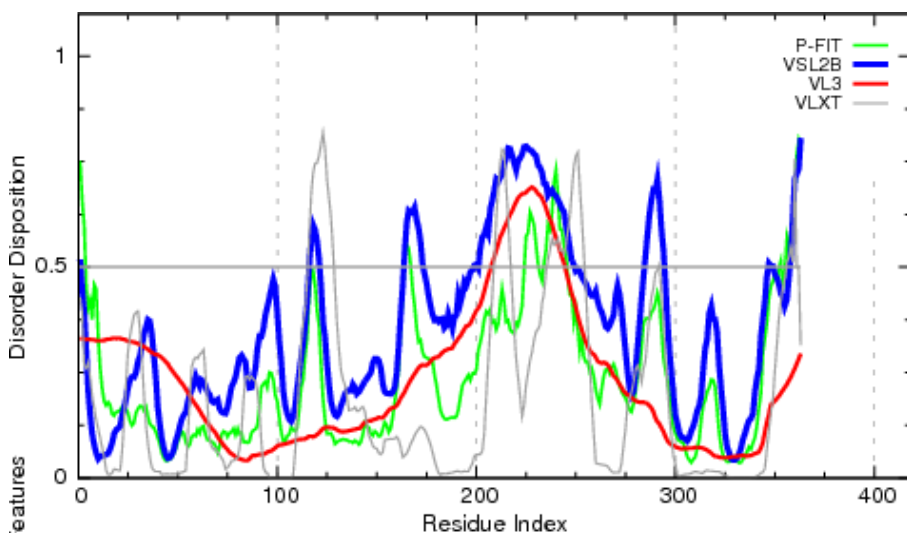

## =====PONDR VSL2 STATISTICS=====

|                                        |                                  |
|----------------------------------------|----------------------------------|
| Predicted residues: 363                | Number Disordered Regions: 7     |
| Number residues disordered: 86         | Longest Disordered Region: 48    |
| Overall percent disordered: 23.69      | Average Prediction Score: 0.3541 |
| Predicted disorder segment [116]-[121] | Average Strength= 0.5558         |
| Predicted disorder segment [164]-[173] | Average Strength= 0.5941         |
| Predicted disorder segment [199]-[200] | Average Strength= 0.5054         |
| Predicted disorder segment [202]-[249] | Average Strength= 0.6874         |
| Predicted disorder segment [285]-[294] | Average Strength= 0.6248         |
| Predicted disorder segment [347]-[349] | Average Strength= 0.5044         |
| Predicted disorder segment [358]-[363] | Average Strength= 0.6849         |

## ANCHOR:

| Predicted Disordered Binding Regions |      |     |        |
|--------------------------------------|------|-----|--------|
|                                      | From | To  | Length |
| None                                 |      |     |        |
| Filtered Regions                     |      |     |        |
|                                      | From | To  | Length |
| 1                                    | 327  | 329 | 3      |

## ModPred and PROSITE:

ModPred: Disulphide linkage (C103), Amidation (Y248, Y325).  
PROSITE: No identified domain recognition sites.

## Structural modelling:

| Name                                                                                                       | Title                   | Identity | Method      | Oligo State     | Ligands                                                                            |
|------------------------------------------------------------------------------------------------------------|-------------------------|----------|-------------|-----------------|------------------------------------------------------------------------------------|
|  <a href="#">1czf.1.A</a> | POLYGALACTURONASE II    | 40.48    | X-ray, 1.7Å | monomer         | 3 x <u>ZN</u> , 1 x <u>NAG</u>                                                     |
|  <a href="#">1k5c.1.A</a> | ENDOPOLYGALACTURONASE   | 41.72    | X-ray, 1.0Å | monomer         | 2 x <u>NAG</u>                                                                     |
|  <a href="#">3lmw.1.A</a> | Iota-carrageenase, CgiA | 10.14    | X-ray, 2.6Å | monomer         | 1 x <u>NI</u> , 1 x <u>CA</u>                                                      |
|  <a href="#">4xqi.1.A</a> | Tail spike protein      | 13.82    | X-ray, 1.8Å | homo-trimer     | 3 x <u>GLC</u> , 3 x <u>GLA</u> , 3 x <u>RAM</u> , 3 x <u>NAG</u> , 3 x <u>NDG</u> |
|  <a href="#">5gai.1.Y</a> | Tail fiber protein      | 17.27    | EM          | hetero-oligomer | None                                                                               |
|  <a href="#">4xor.1.A</a> | Tail spike protein      | 12.07    | X-ray, 1.5Å | homo-trimer     | 3 x <u>GLC</u> , 3 x <u>GLA</u> , 3 x <u>RAM</u> , 6 x <u>NAG</u> , 3 x <u>NDG</u> |

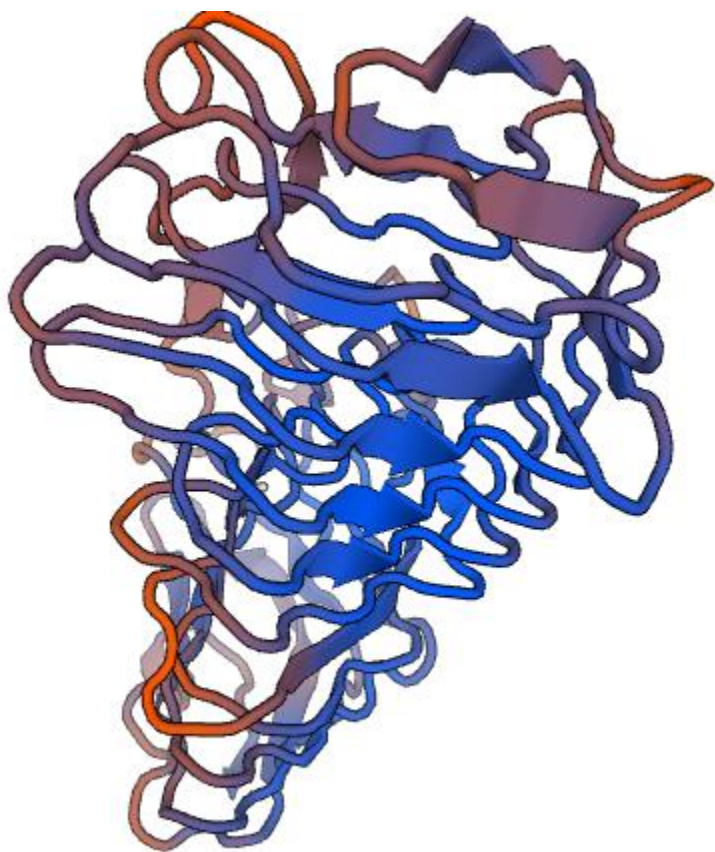

Model #1: Residues 26-360 of MVLG\_05108T0 with 1k5c.1.A (41.72% sequence identity) as a template

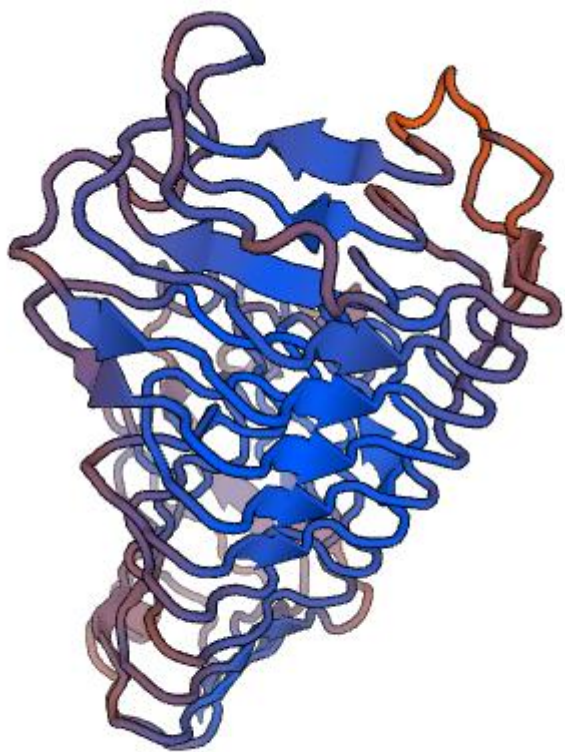

Model #2: Residues 26-347 of MVLG\_05108T0 with [1czf.1.A](#) (40.48% sequence identity) as a template

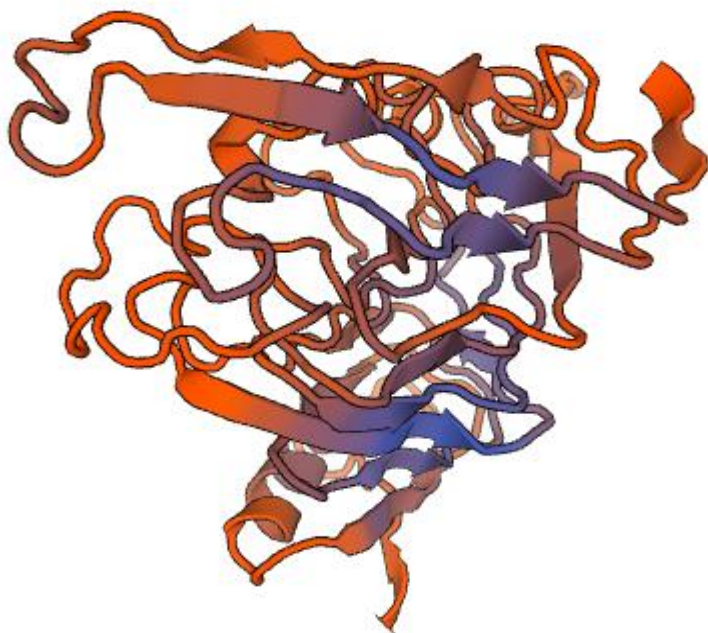

Model #3: Residues 13-314 of MVLG\_05108T0 with [4xqi.1.A](#) (13.82% sequence identity) as a template

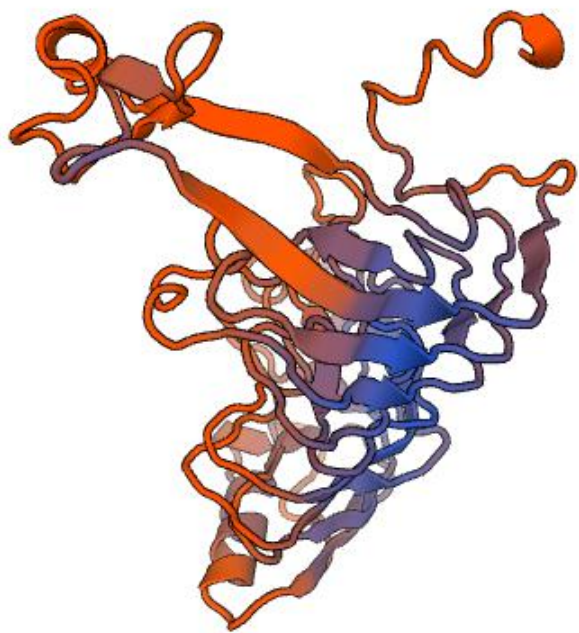

Model #4: Residues 14-330 of MVLG\_05108T0 with 3lmw.1.A (10.14% sequence identity) as a template

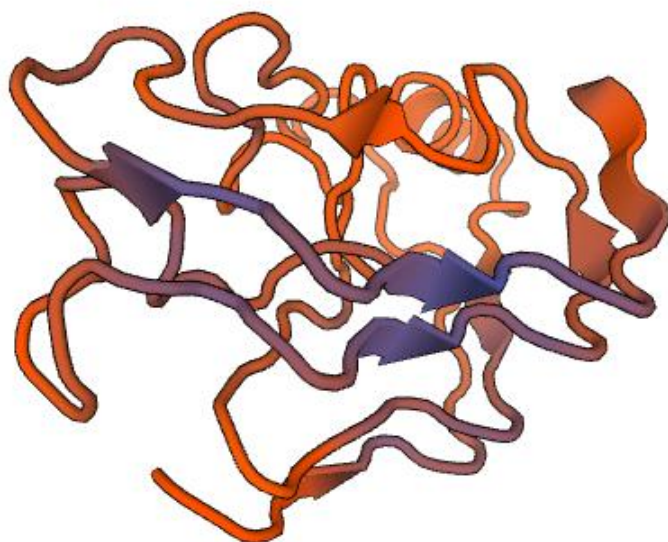

Model #5: Residues 142-274 of MVLG\_05108T0 with 4xor.1.A (12.07% sequence identity) as a template

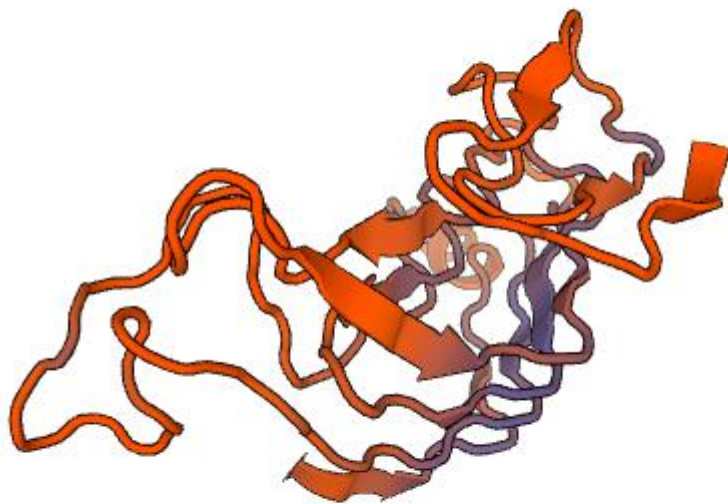

Model #6: Residues 151-313 of MVLG\_05108T0 with 5gai.1.Y (17.27% sequence identity) as a template

# > MVLG\_04797T0 (23.60%)- 428 aa

**MPKAAIFNVATVRVLVTFVTLLVFVSPLAA**ADAVDHPKLRVKGGLGRAGAPAEVIASAAASVTG  
SNSKSYPRGYSAVIAFGASYMDNAHKRSKKYATSFRDQQEYPFSDRGRYTNGPVAVEYMKPSTN  
PALRPFQIDPPVLFDFAYGGSVIKNNLTGTAGPHNIPDLGREIKQYLEQLDDEIIDPGRGRVLHVIHTG  
TNPISQMWLHALTANITHAKTRRSIGKQVTQMAKYIRYLATHDSLDRDNVVAADYLIVGLPPLGIVPN  
LYFNIAAFPNTAAQRDAALEYAGELVDLFNVELEAFTSSLKAYVKPGSRILYYDLANLFKTIYRF  
PRIYGITAPVTQACWSSSTRVLCKDPEHHL YIDTLHPTTSAHKIWASRMNRLVNKVARQADAKTLE  
TTVEDDPTTDDHPSSKTDDEPSSSPGDLRC

## PONDR:

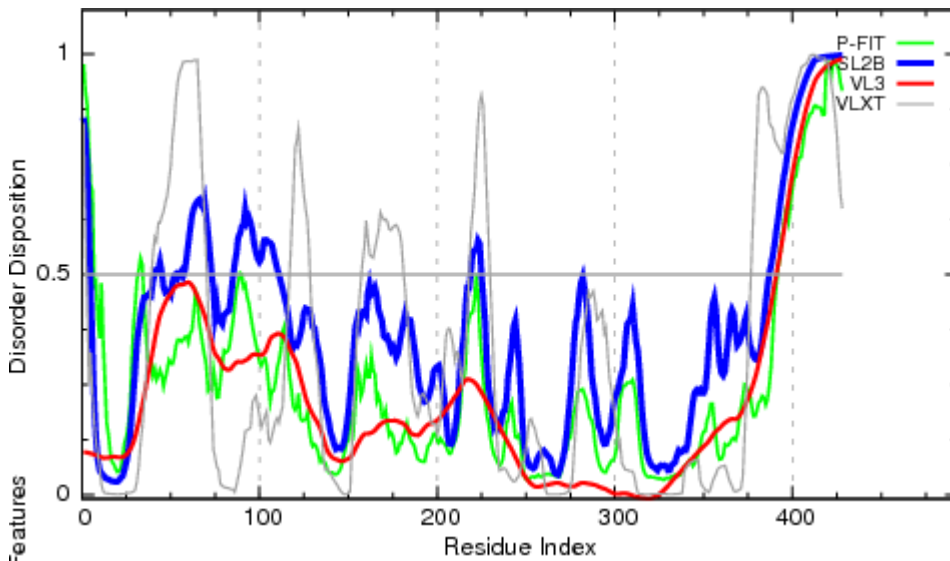

## =====PONDR VSL2 STATISTICS=====

|                                        |                                  |
|----------------------------------------|----------------------------------|
| Predicted residues: 428                | Number Disordered Regions: 8     |
| Number residues disordered: 101        | Longest Disordered Region: 42    |
| Overall percent disordered: 23.60      | Average Prediction Score: 0.3703 |
| Predicted disorder segment [1]-[4]     | Average Strength= 0.7574         |
| Predicted disorder segment [41]-[45]   | Average Strength= 0.5111         |
| Predicted disorder segment [53]-[53]   | Average Strength= 0.5008         |
| Predicted disorder segment [56]-[56]   | Average Strength= 0.5064         |
| Predicted disorder segment [58]-[73]   | Average Strength= 0.6098         |
| Predicted disorder segment [86]-[110]  | Average Strength= 0.5725         |
| Predicted disorder segment [219]-[225] | Average Strength= 0.5442         |
| Predicted disorder segment [387]-[428] | Average Strength= 0.8670         |

## ANCHOR:

| Predicted Disordered Binding Regions |      |     |        |
|--------------------------------------|------|-----|--------|
|                                      | From | To  | Length |
| 1                                    | 140  | 150 | 11     |
| 2                                    | 383  | 389 | 7      |
| Filtered Regions                     |      |     |        |
|                                      | From | To  | Length |
| 1                                    | 424  | 428 | 5      |

## ModPred and PROSITE:

ModPred: Ubiquitination (K3), Amidation (A4, S26, A373, A389, K414), Methylation (K68), Proteolytic cleavage (R100), Phosphorylation (S422).

PROSITE: No identified domain recognition sites.

## Structural modelling:

| Name                                                                                                       | Title                               | Identity | Method      | Oligo State | Ligands |
|------------------------------------------------------------------------------------------------------------|-------------------------------------|----------|-------------|-------------|---------|
|  <a href="#">3kvn.1.A</a> | Esterase estA                       | 21.58    | X-ray, 2.5Å | monomer     | None    |
|  <a href="#">1zmb.1.A</a> | Acetylxytan esterase related enzyme | 9.52     | X-ray, 2.6Å | homo-dimer  | None    |

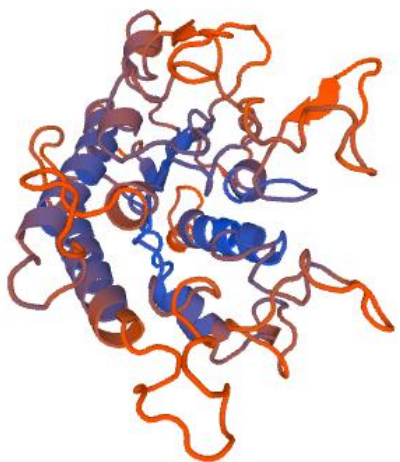

Model #1: Residues 71-399 of MVLG\_04797T0 with 3kvn.1.A (21.58% sequence identity) as a template

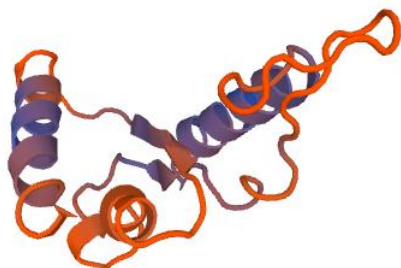

Model #2: Residues 293-389 of MVLG\_04797T0 with 1zmb.1.A (9.52% sequence identity) as a template

> MVLG\_03707T0 (22.86%)- 433 aa

**MLSHSTSRRLRSWGAFLCLPWNPLALVLA**ATIP TSHSLLTNSGLDSRTL GKVRERLDLVARDVW  
VSGTQTEAYLELDQPQLTVFN PYVFNPFTP KSSRDRVILESSFPNSSNRIVLNWLERLGPDDDEQFAVI  
KGGAAGDPASLG YAWMIAQATTTDEGTQERLERMIEAEVEWLLEKVPRTMDGAISHRKEVTQLWS  
DFIYMVPPFLAARGIATSNHSL LLESYRQIKLYRSHLQDTSTHLWRHVRYGTWEDPSLWATGNAWA  
AAGITRVLATLTNSFHTAMYWEEIRD LALWANEIVEAGFARVKKDGLLPNHLDDPYDFSDSASSAL  
LASTVFRLHQLGMIRKPSTTLAKAEKIRSKINDKIDPKTGWLRGCVNPLSWYQRTDQSPEAQAFVIL  
LEAAWRDSRMISERN SIA SKEKVFGGQGTHTRRRDR

## PONDR:

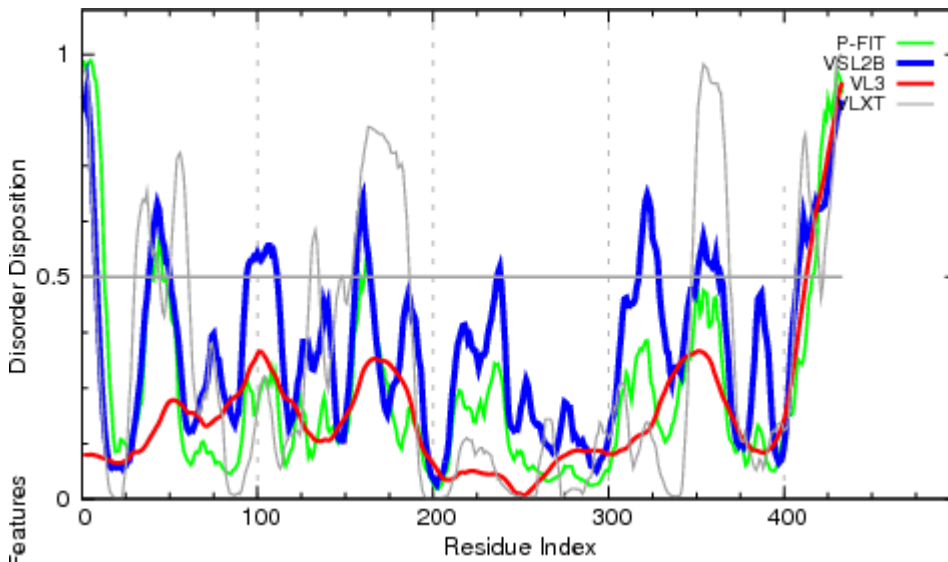

## PONDR VSL2 STATISTICS

|                                        |                                  |
|----------------------------------------|----------------------------------|
| Predicted residues: 433                | Number Disordered Regions: 9     |
| Number residues disordered: 99         | Longest Disordered Region: 26    |
| Overall percent disordered: 22.86      | Average Prediction Score: 0.3405 |
| Predicted disorder segment [1]-[8]     | Average Strength= 0.7855         |
| Predicted disorder segment [39]-[50]   | Average Strength= 0.5846         |
| Predicted disorder segment [94]-[111]  | Average Strength= 0.5440         |
| Predicted disorder segment [156]-[164] | Average Strength= 0.5907         |
| Predicted disorder segment [237]-[238] | Average Strength= 0.5152         |
| Predicted disorder segment [318]-[328] | Average Strength= 0.6108         |
| Predicted disorder segment [351]-[362] | Average Strength= 0.5418         |
| Predicted disorder segment [364]-[364] | Average Strength= 0.5008         |
| Predicted disorder segment [408]-[433] | Average Strength= 0.6937         |

## ANCHOR:

| Predicted Disordered Binding Regions |      |     |        |
|--------------------------------------|------|-----|--------|
|                                      | From | To  | Length |
| 1                                    | 393  | 401 | 9      |
| Filtered Regions                     |      |     |        |
|                                      | From | To  | Length |
| 1                                    | 148  | 148 | 1      |
| 2                                    | 375  | 377 | 3      |

### ModPred and PROSITE:

ModPred: Proteolytic cleavage (R9, R12, D321, R431, R433), Sumoylation (K178), Sulfation (Y320).

PROSITE: No identified domain recognition sites.

### Structural modelling:

| Name                                                                                                       | Title                         | Identity | Method      | Oligo State  | Ligands                |
|------------------------------------------------------------------------------------------------------------|-------------------------------|----------|-------------|--------------|------------------------|
|  <a href="#">4mmi.1.A</a> | Heparinase III protein        | 10.34    | X-ray, 2.4Å | monomer      | 2 x <a href="#">CA</a> |
|  <a href="#">3qwt.1.A</a> | Putative GH105 family protein | 24.18    | X-ray, 2.2Å | homo-octamer | None                   |

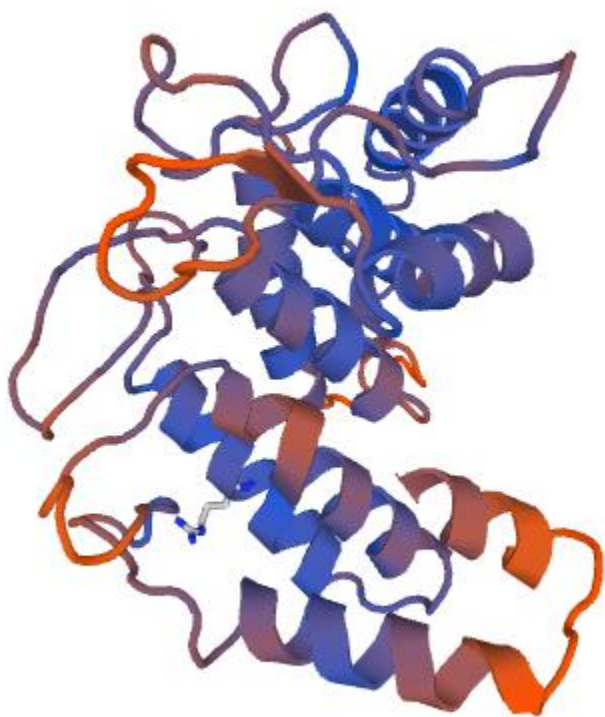

Model #1: Residues 150-402 of MVLG\_03707T0 with 3qwt.1.A (24.18% sequence identity) as a template

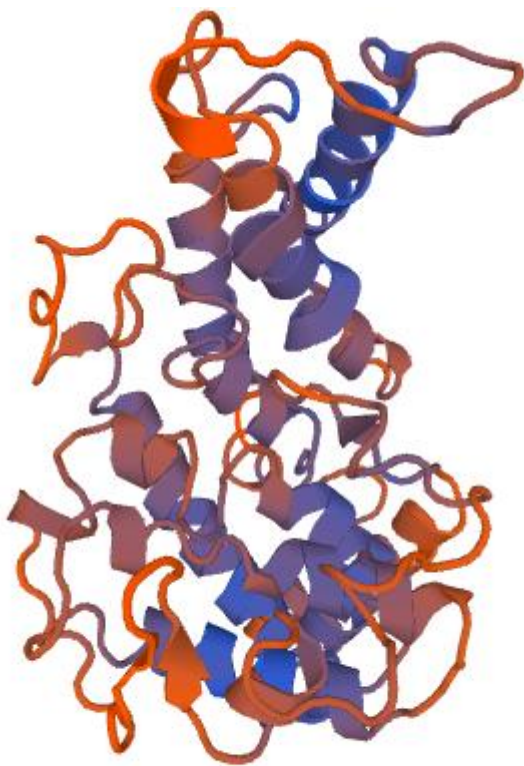

Model #2: Residues 45-378 of MVLG\_03707T0 with 4mmi.1.A (10.34% sequence identity) as a template

> MVLG\_01732T0 (22.44%)- 156 aa  
**MLLKLITLIVALLVLNV**SALQEAGDTKAEFRLIKRAAAQKSNLTQPTENASFLHHPFELNYDP  
KIVYAVDVELLSEHDKSIPLAVQMAGDHTGAISTTFSTPYFAENSVKYRNVTLRVTEWSLPSHNTAP  
KKKSSTIDRKIVCRNFSGKIHA

PONDR:

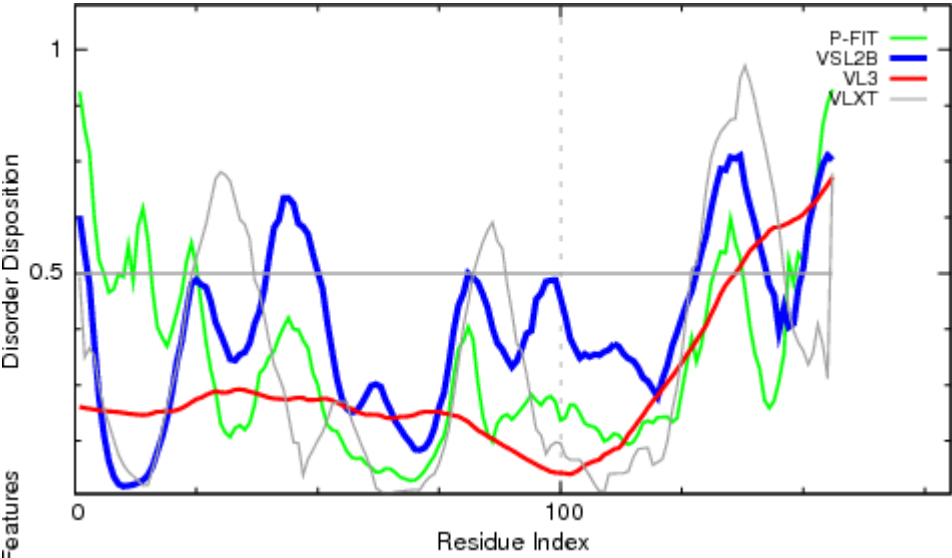

| =====PONDR VSL2 STATISTICS=====        |                                  |  |  |
|----------------------------------------|----------------------------------|--|--|
| Predicted residues: 156                | Number Disordered Regions: 4     |  |  |
| Number residues disordered: 35         | Longest Disordered Region: 15    |  |  |
| Overall percent disordered: 22.44      | Average Prediction Score: 0.3764 |  |  |
| Predicted disorder segment [1]-[2]     | Average Strength= 0.5863         |  |  |
| Predicted disorder segment [40]-[50]   | Average Strength= 0.5999         |  |  |
| Predicted disorder segment [128]-[142] | Average Strength= 0.6503         |  |  |
| Predicted disorder segment [150]-[156] | Average Strength= 0.6757         |  |  |

ANCHOR:

| Predicted Disordered Binding Regions |      |     |        |
|--------------------------------------|------|-----|--------|
|                                      | From | To  | Length |
| 1                                    | 145  | 153 | 9      |

ModPred and PROSITE:

ModPred: Amidation (Y115).  
PROSITE: No identified domain recognition sites.

## Structural modelling:

|                          | Name                     | Title                                            | Identity | Method      | Oligo State     | Ligands        |
|--------------------------|--------------------------|--------------------------------------------------|----------|-------------|-----------------|----------------|
| <input type="checkbox"/> | <a href="#">2lzs.1.A</a> | Sec-independent protein translocase protein TatA | 20.59    | NMR         | monomer         | None           |
| <input type="checkbox"/> | <a href="#">5cwb.1.A</a> | Designed helical repeat protein                  | 28.21    | X-ray, 1.5Å | monomer         | None           |
| <input type="checkbox"/> | <a href="#">5bwd.1.A</a> | benzylsuccinate synthase alpha chain             | 17.65    | X-ray, 2.0Å | hetero-oligomer | 1 x <u>FUM</u> |
| <input type="checkbox"/> | <a href="#">2jn8.1.A</a> | Putative cytoplasmic protein                     | 39.29    | NMR         | monomer         | None           |

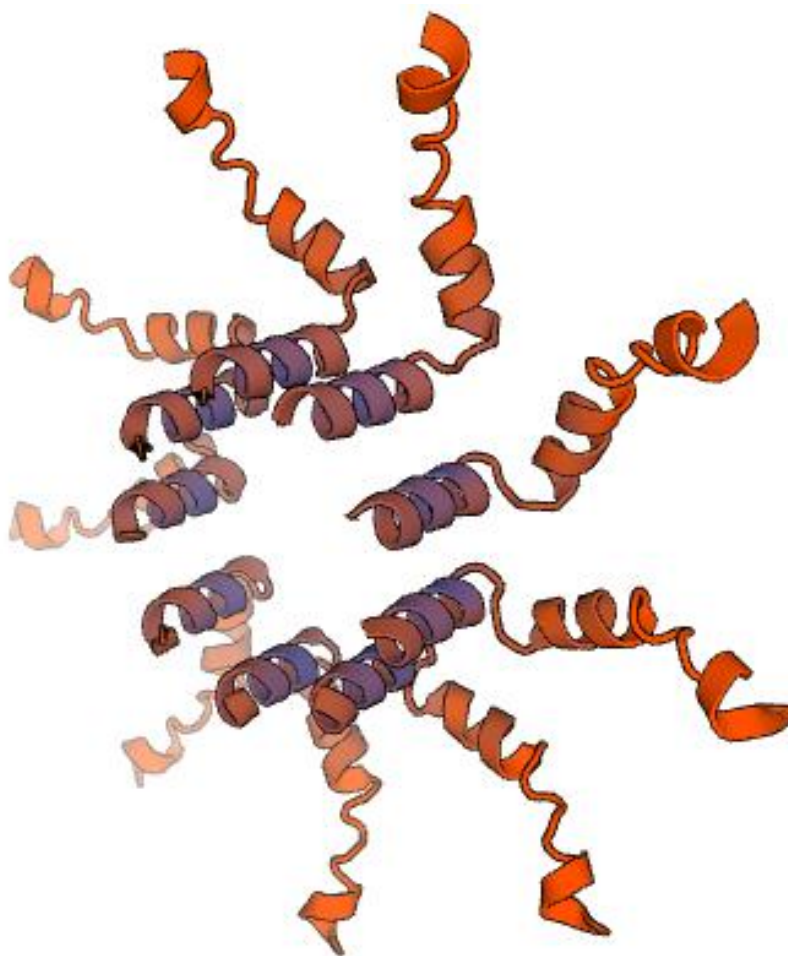

Model #1: Residues 4-37 of MVLG\_01732T0 with 2lzs.1.E (20.59 % sequence identity) as a template

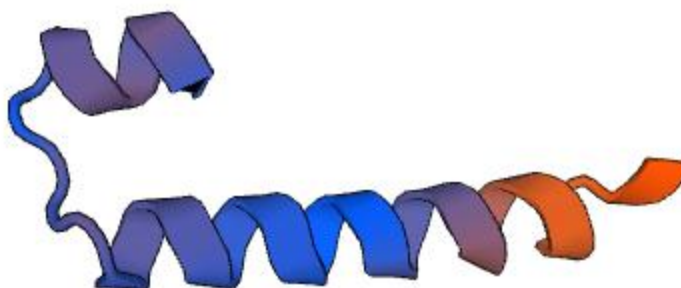

Model #2: Residues 18-51 of MVLG\_01732T0 with 5cwb.1.A (28.21 % sequence identity) as a template

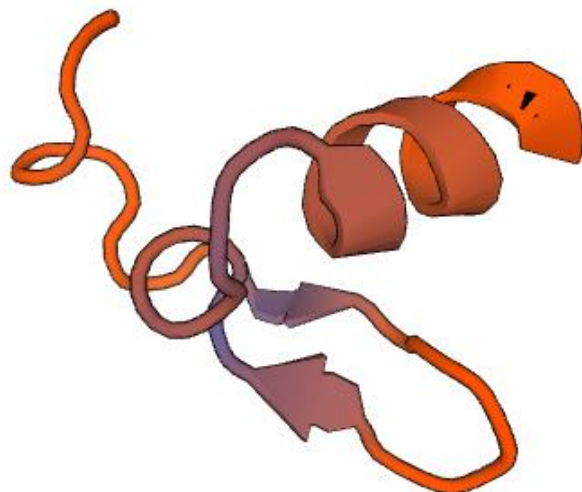

Model #3: Residues 110-143 of MVLG\_01732T0 with 5bwd.1.A (17.65 % sequence identity) as a template

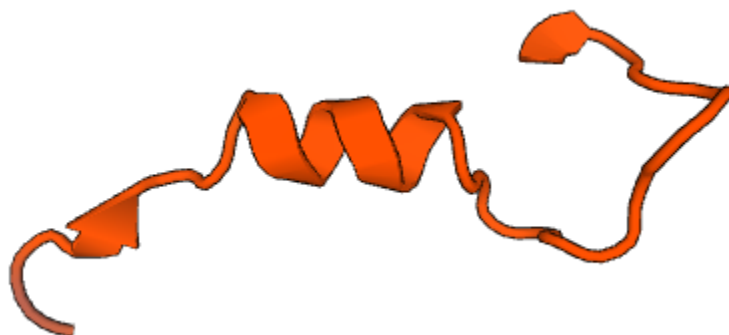

Model #4: Residues 81-110 of MVLG\_01732T0 with 2jn8.1.A (36.67 % sequence identity) as a template

# > MVLG\_01191T0 (21.19%)- 505 aa

**MRYSRQLWFGGLLSQLVTA**VTPEVYNNGDCTSSRRFRGLAHTNALMRHSADTFDAPRGVPLLA  
LSAPNQMSKIVGLGKRSPAVPAGVSVSVRANVEVGGQSLQPCADDCDHPQPPPSEEPVISGPGTLP  
RSDSYLTLDARTGLLLDDEPFRPVGINIYWLCNDENIEGRPKGYPTDKTRVREALAAAVAMGANT  
VRIGSCGTSLGFDIAIQPDLHHYADDDGMDIHDYAIWAAGRYDLKVILTLDNYDYYHGGKYTLR  
WLGEPTDDAGARFFADERPIQVYLRyakwVLGRVNRyNNIAyGEDPTVSIETGNELGAYMGKEG  
YPPLNWTDRVAQRIKQLAPLALVMDGTDGIYNWSTKATAPGLLSPHIDIVTDHPYPRDINLFRTQAQ  
LAKSANKVFLLGEMNWLPTGATNANLSDYLEVLDKYPSVGVLVWSLFTHDSQCSEYVLHNDSYSI  
YYPDGPNTPEEKQNIWSLVQWFYRVTDRAVPAVLPVQACPQEVF

## PONDR:

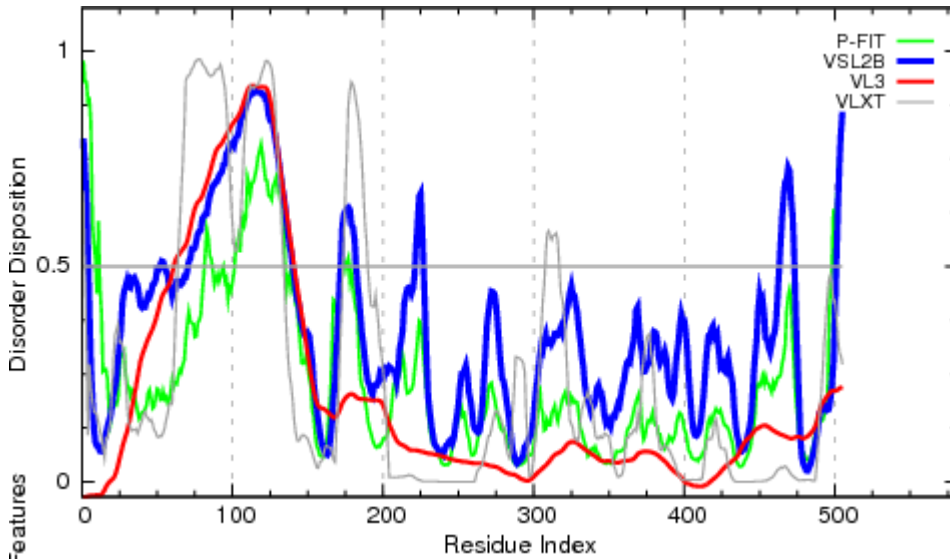

| =====PONDR VSL2 STATISTICS=====        |                                  |
|----------------------------------------|----------------------------------|
| Predicted residues: 505                | Number Disordered Regions: 7     |
| Number residues disordered: 107        | Longest Disordered Region: 69    |
| Overall percent disordered: 21.19      | Average Prediction Score: 0.3548 |
| Predicted disorder segment [1]-[4]     | Average Strength= 0.6816         |
| Predicted disorder segment [52]-[54]   | Average Strength= 0.5082         |
| Predicted disorder segment [71]-[139]  | Average Strength= 0.7406         |
| Predicted disorder segment [172]-[182] | Average Strength= 0.5923         |
| Predicted disorder segment [222]-[226] | Average Strength= 0.6133         |
| Predicted disorder segment [464]-[473] | Average Strength= 0.6476         |
| Predicted disorder segment [501]-[505] | Average Strength= 0.7122         |

## ANCHOR:

| Predicted Disordered Binding Regions |      |     |        |
|--------------------------------------|------|-----|--------|
|                                      | From | To  | Length |
| 1                                    | 88   | 94  | 7      |
| 2                                    | 103  | 108 | 6      |
| 3                                    | 136  | 144 | 9      |
| 4                                    | 157  | 166 | 10     |

| Filtered Regions |      |     |        |
|------------------|------|-----|--------|
|                  | From | To  | Length |
| 1                | 61   | 65  | 5      |
| 2                | 146  | 148 | 3      |

### ModPred and PROSITE:

ModPred: Amidation (A20, P82, D337, P492), Proteolytic cleavage (R36, R38, R58, R276), ADP-ribosylation (R80, R133), O-linked glycosylation (S126).

PROSITE: No identified domain recognition sites.

### Structural modelling:

| Name                                                                                                       | Title                                | Identity | Method      | Oligo State | Ligands |
|------------------------------------------------------------------------------------------------------------|--------------------------------------|----------|-------------|-------------|---------|
|  <a href="#">1uuq.1.A</a> | MANNOSYL-OLIGOSACCHARIDE GLUCOSIDASE | 19.59    | X-ray, 1.5Å | monomer     | None    |
|  <a href="#">5byw.1.A</a> | Endoglucanase H                      | 28.21    | X-ray, 1.5Å | monomer     | None    |

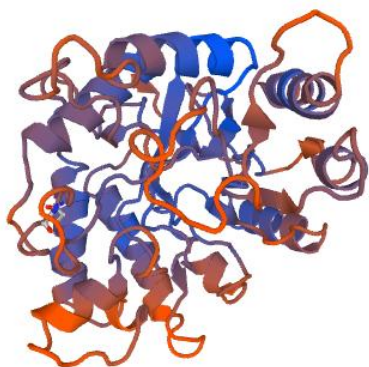

Model #1: Residues 135-488 of MVLG\_01191T0 with 1uuq.1.A (19.59 % sequence identity) as a template

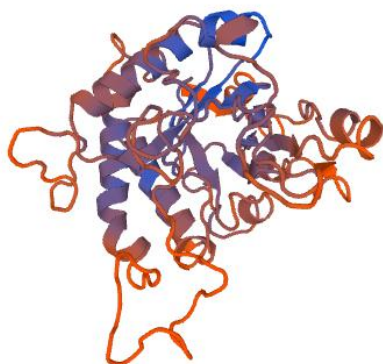

Model #2: Residues 137-467 of MVLG\_01191T0 with 5byw.1.A (15.33 % sequence identity) as a template

> MVLG\_05525T0 (20.63%)- 126 aa  
MCRSSNMARPGMLILALITTVAPIAIALTHVENACAKEAVLHNDLSDGAKCKSITDLGCVCSESTG  
DAFLRSLGDYVKDGRGRCREQYFANIQAYACAYCLFKDLVPPQSCGKASVSTVPTESDVQ

PONDR:

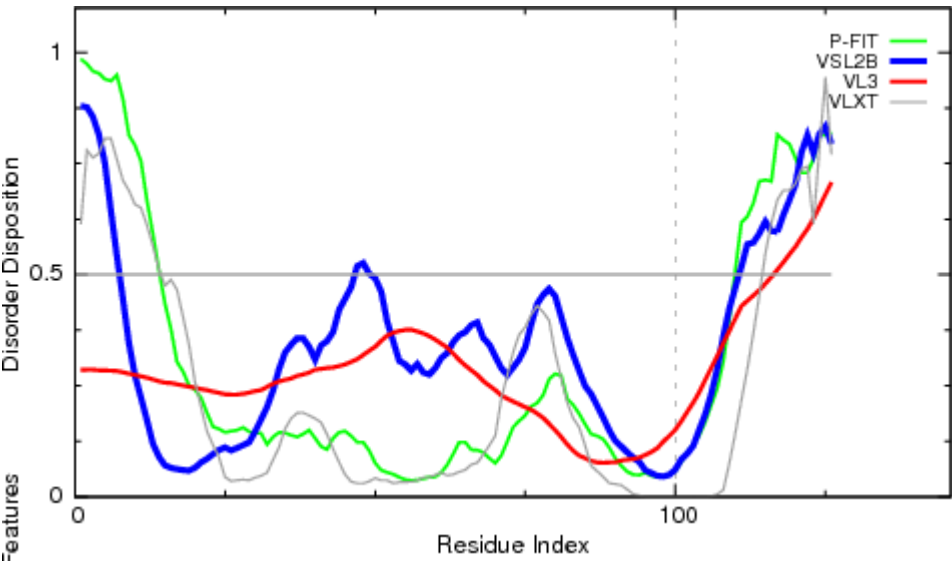

| -----PONDR VSL2 STATISTICS-----        |                                  |  |  |
|----------------------------------------|----------------------------------|--|--|
| Predicted residues: 126                | Number Disordered Regions: 3     |  |  |
| Number residues disordered: 26         | Longest Disordered Region: 16    |  |  |
| Overall percent disordered: 20.63      | Average Prediction Score: 0.3398 |  |  |
| Predicted disorder segment [1]-[7]     | Average Strength= 0.7662         |  |  |
| Predicted disorder segment [47]-[49]   | Average Strength= 0.5157         |  |  |
| Predicted disorder segment [111]-[126] | Average Strength= 0.6798         |  |  |

ANCHOR:

| Predicted Disordered Binding Regions |      |    |        |
|--------------------------------------|------|----|--------|
|                                      | From | To | Length |
| None                                 |      |    |        |

ModPred and PROSITE:

ModPred: GPI anchor amidation (N6).

PROSITE: No identified domain recognition sites.

## Structural modelling:

|                                                                                   | Name                     | Title                         | Identity | Method      | Oligo State | Ligands |
|-----------------------------------------------------------------------------------|--------------------------|-------------------------------|----------|-------------|-------------|---------|
|  | <a href="#">5hiu.1.A</a> | GTPase activator-like protein | 10.53    | X-ray, 2.5Å | monomer     | None    |

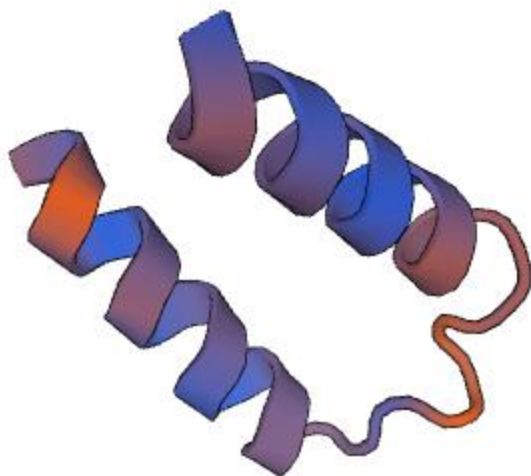

Model #1: Residues 64-101 of MVLG\_05525T0 with 5hiu.1.A (10.53 % sequence identity) as a template

# > MVLG\_02331T0 (19.73%)- 679 aa

**MWACFSASLVTVTCAALASA**HDPFSRSTIRHSRRYSLLPDTYILETECPDASILAEASPRTSGANMD  
 SLVTEVLAAFPDARPRHVYDSALFCGLSVELGADSPHTQLLRIQLKSVSPVRSIQLGVRTAGSSDTP  
 FQAEASLNVPRTARGESDYLSHVMLEVDKMHEMGLFGSRETLACVIDSGIDLMHPLLNGNGCFG  
 SNCKVVTGYDFVGDGDGHSPKRSPQTSCSDHGHTHIAGILAADKFKAFGFSGVAPNASLGVYRVFSCK  
 GAASSDTFLKAMLMAADDGCRVLSLSFGKALGWDQDDGDDPFRKVVSRLATRGVFIAAASGND  
 SQGLMFAQTPADLAGILAVGSVEPVAAPRGFKLSFEHNRYPSTMTYLALRPVNHSQTFQIHFSIRRA  
 KDTSCDPLLPRSSNFTNSVVVLQKGACGTKLIHFFVRHGARVVIAHDNGDPEQAQNWRRTAYAVH  
 SQEGLEWLLKWPTSAVHTLLDHYLDSLGLDQVNFRSKDPVPQDELIDRVAGGLVSEYTEFGPAATL  
 DTLAAHVSAPGSSILSTFPLNKGGYGVASGTSMATPMAAGVATLLISHRKDDHLTPAQIRSLMITTA  
 GPVATKLNNSVHPLTTVMQQGGGLVSAHRAHYHAMTLIWPLYALALYDTPRHVKDHSVTLTNTHKSV  
 VTYSFNSVPSQTLAMYNKV

## PONDR:

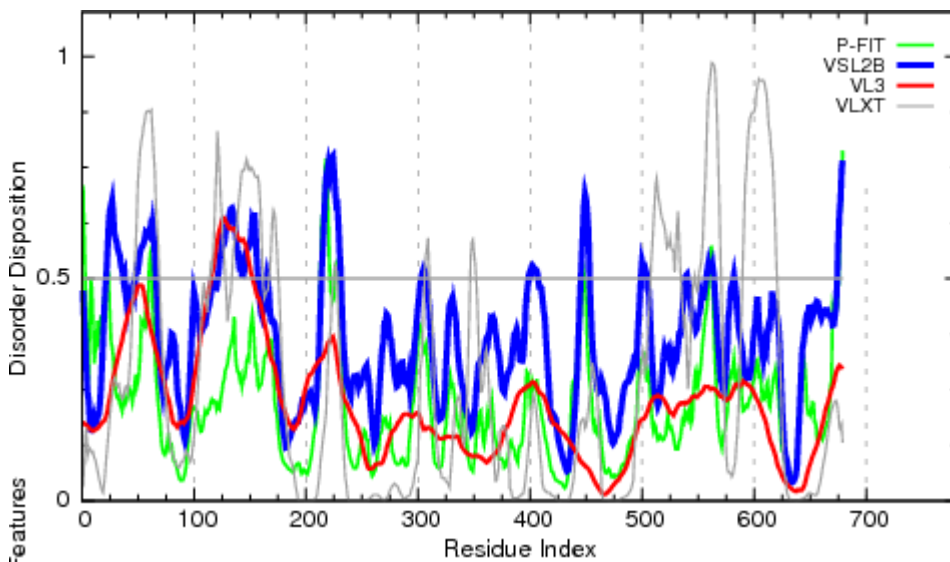

| =====PONDR VSL2 STATISTICS=====        |                                  |
|----------------------------------------|----------------------------------|
| Predicted residues: 679                | Number Disordered Regions: 13    |
| Number residues disordered: 134        | Longest Disordered Region: 36    |
| Overall percent disordered: 19.73      | Average Prediction Score: 0.3656 |
| Predicted disorder segment [22]-[38]   | Average Strength= 0.5801         |
| Predicted disorder segment [48]-[66]   | Average Strength= 0.5721         |
| Predicted disorder segment [122]-[157] | Average Strength= 0.5821         |
| Predicted disorder segment [165]-[165] | Average Strength= 0.5088         |
| Predicted disorder segment [214]-[231] | Average Strength= 0.6758         |
| Predicted disorder segment [303]-[307] | Average Strength= 0.5114         |
| Predicted disorder segment [399]-[407] | Average Strength= 0.5154         |
| Predicted disorder segment [446]-[453] | Average Strength= 0.6192         |
| Predicted disorder segment [499]-[504] | Average Strength= 0.5225         |
| Predicted disorder segment [539]-[540] | Average Strength= 0.5076         |
| Predicted disorder segment [558]-[564] | Average Strength= 0.5195         |
| Predicted disorder segment [582]-[582] | Average Strength= 0.5082         |
| Predicted disorder segment [675]-[679] | Average Strength= 0.6825         |

## ANCHOR:

| Predicted Disordered Binding Regions |      |     |        |
|--------------------------------------|------|-----|--------|
|                                      | From | To  | Length |
| 1                                    | 88   | 95  | 8      |
| Filtered Regions                     |      |     |        |
|                                      | From | To  | Length |
| 1                                    | 429  | 432 | 4      |

## ModPred and PROSITE:

ModPred: Proteolytic cleavage (Y35, Y210, D211, R310), O-linked glycosylation (S62, S227), Phosphorylation (S117), N-linked glycosylation (N197), Amidation (S664)

PROSITE: Subtilase\_ASP (181-192, PROSITE entry PS00136), Subtilase\_HIS (231-241, PROSITE Entry PS00137), Subtilase\_SER (559-569, PROSITE entry PS00138)

Subtilases are an extensive family of serine proteases whose catalytic activity is provided by a charge relay system similar to that of the trypsin family of serine proteases but which evolved by independent convergent evolution. Subtilase family currently includes the following proteases in Fungi:

- Alkaline extracellular protease (AEP) from *Yarrowia lipolytica* (gene xpr2).
- Alkaline proteinase from *Cephalosporium acremonium* (gene alp).
- Cerevisin (EC 3.4.21.48) (vacuolar protease B) from yeast (gene PRB1).
- Cuticle-degrading protease (pr1) from *Metarhizium anisopliae*.
- KEX-1 protease from *Kluyveromyces lactis*.
- Kexin (EC 3.4.21.61) from yeast (gene KEX-2).
- Oryzin (EC 3.4.21.63) (alkaline proteinase) from *Aspergillus* (gene alp).
- Proteinase K (EC 3.4.21.64) from *Tritirachium album* (gene proK).
- Proteinase R from *Tritirachium album* (gene proR).
- Proteinase T from *Tritirachium album* (gene proT).
- Subtilisin-like protease III from yeast (gene YSP3).
- Thermomycolin (EC 3.4.21.65) from *Malbranchea sulfurea*.

## Structural modelling:

|                          | Name                     | Title                           | Identity | Method      | Oligo State     | Ligands                                                                                                 |
|--------------------------|--------------------------|---------------------------------|----------|-------------|-----------------|---------------------------------------------------------------------------------------------------------|
| <input type="checkbox"/> | <a href="#">3eif.1.A</a> | C5a peptidase                   | 23.48    | X-ray, 1.9Å | monomer         | 1 x <a href="#">CA</a> , 1 x <a href="#">MLA</a>                                                        |
| <input type="checkbox"/> | <a href="#">4i0w.1.B</a> | Protease CspB                   | 18.69    | X-ray, 1.6Å | hetero-oligomer | None                                                                                                    |
| <input type="checkbox"/> | <a href="#">1r6v.1.A</a> | subtilisin-like serine protease | 24.16    | X-ray, 1.7Å | monomer         | 1 x <a href="#">CA</a>                                                                                  |
| <input type="checkbox"/> | <a href="#">1y9z.1.A</a> | alkaline serine protease        | 23.16    | X-ray, 1.4Å | monomer         | 2 x <a href="#">CA</a> , 1 x <a href="#">PMS</a>                                                        |
| <input type="checkbox"/> | <a href="#">3i74.1.A</a> | Subtilisin-like protease        | 32.94    | X-ray, 2.6Å | homo-dimer      | 1 x <a href="#">NAG-NAG</a> , 1 x <a href="#">NAG-FUC</a> , 2 x <a href="#">ACE-PHE-GLU-LYS-ALV-0QE</a> |

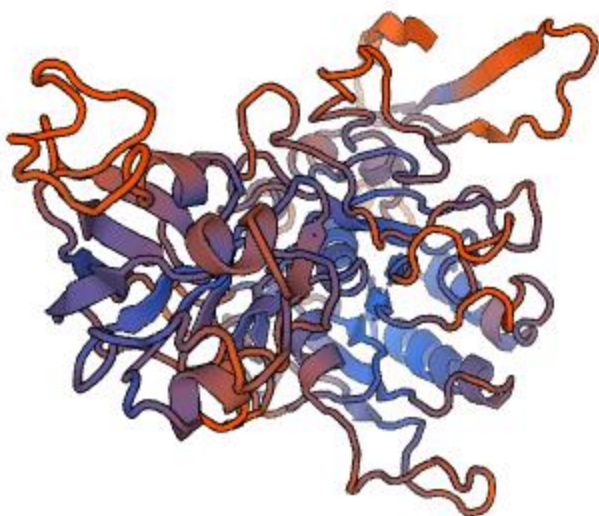

Model #1: Residues 160-667 of MVLG\_02331T0 with 3eif.1.A (23.48 % sequence identity) as a template

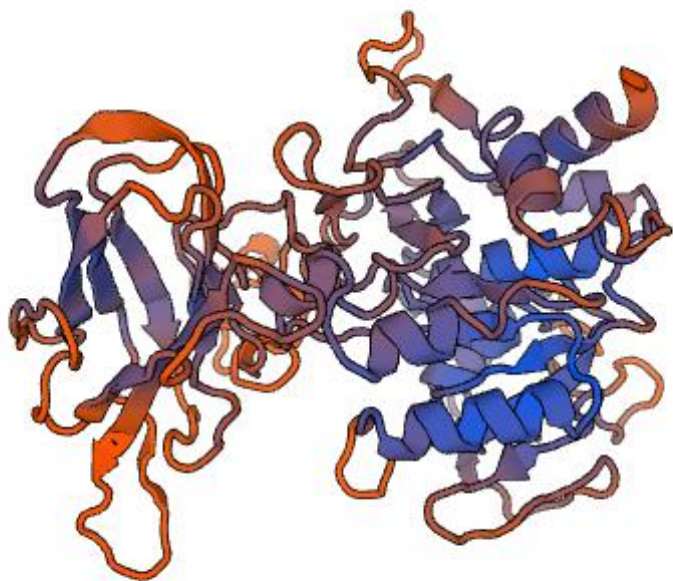

Model #2: Residues 160-632 of MVLG\_02331T0 with 4i0w.1.B (18.69% sequence identity) as a template

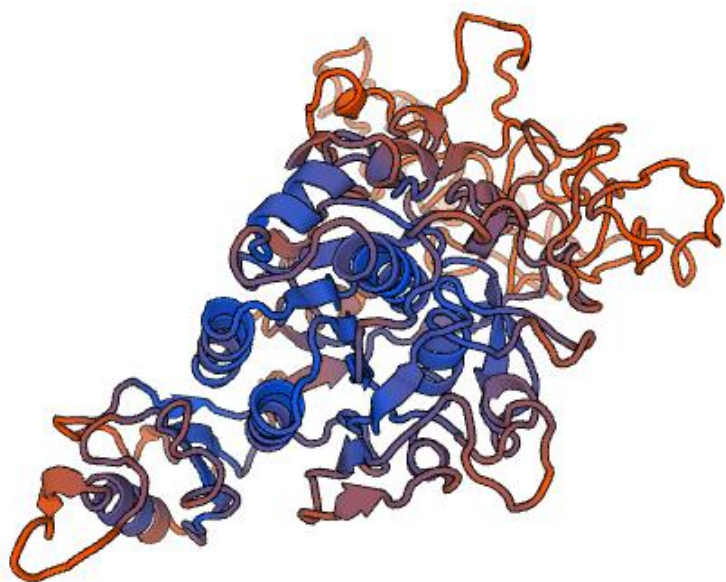

Model #3: Residues 34-630 of MVLG\_02331T0 with 1r6v.1.A (24.16% sequence identity) as a template

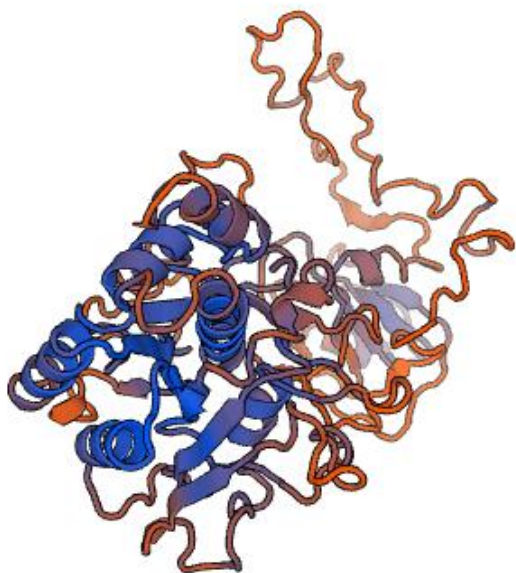

Model #4: Residues 163-633 of MVLG\_02331T0 with 1y9z.1.A (23.16% sequence identity) as a template

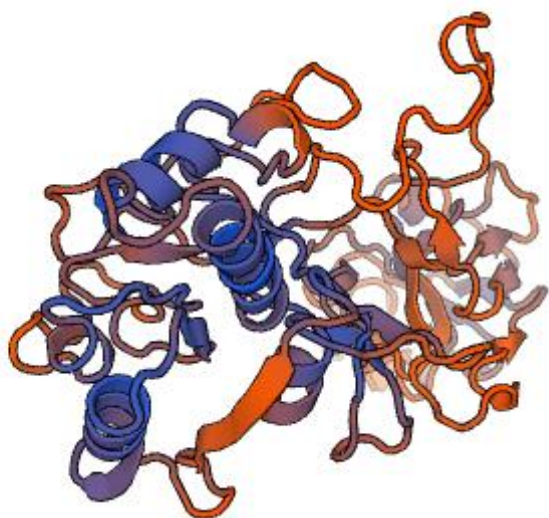

Model #5: Residues 231-625 of MVLG\_02331T0 with 3i74.1.A (32.94% sequence identity) as a template

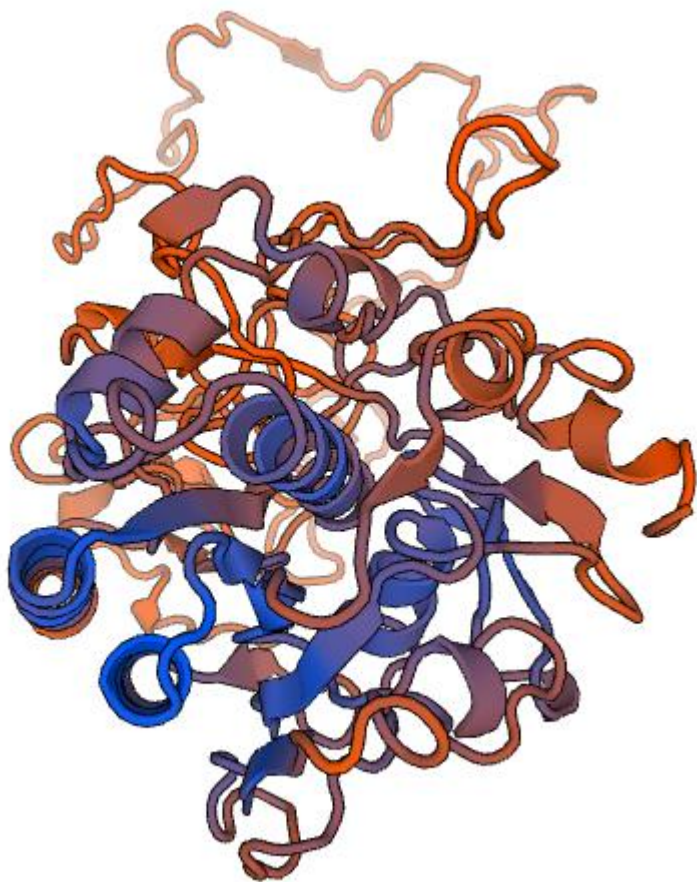

Model #6: Residues 139-631 of MVLG\_02331T0 with 4mzd.1.A (20.48% sequence identity) as a template

> MVLG\_02184T0 (19.34%)- 641 aa

**MLIGDLLPCAFAALGRVL**ASPLPLSEFETELHRHKTSPGHPEKGSVFHSA YKPLWEAHRRGQQL  
ETLKKVTYDHEDYRLSSDFEITDIPTERNYYFDVSEVTAAPDGVTRKMFLVNARVNGELIEANEGDT  
IKLHVRNWLRVGTGIHFHGIPQAHVNYFDGPVGVVTCPIASKSEFTFSFKLVNVCGTYFWHGHRSTQ  
SVDGINGPVVVHCRNDTLKKGADFDREQVVMVTDNYHELSSVIMEKLRSSAGVYGSTSTPTPKSGL  
IQGRGDFDCKNRTNILKGHSCKKQSIYSEIAVPAGSLTRLRFINAGMHAFWRISVDEHEMKLIEVDDT  
PIDAVGMPRIPIINAGQRFSAVLDTRSKDAGSSFWMRSFAATQCFRAPLNGFNPETLAIVRVVDPYAS  
TSSSSGQQKFPTSKPFTHDLVELCEDPATSI LRPRVAENTADTADQVDYFNATYILAPEGGRFYMNIGI  
SFEAYAYDPLLFRAIRGESIANRSATVIMSETTGEGGRARVHDII VNNPGGGAHPFHLHGPRSYIVGG  
GDGTISKETWATMTPM TQNPTRRDVFTVPPNSYIVIRIVADLVGVHAFHCHVSPHTSVGMAGALVV  
RPDLIRQIQLPQESIDMCKASHYDSGFSEETPESARRR

**PONDR:**

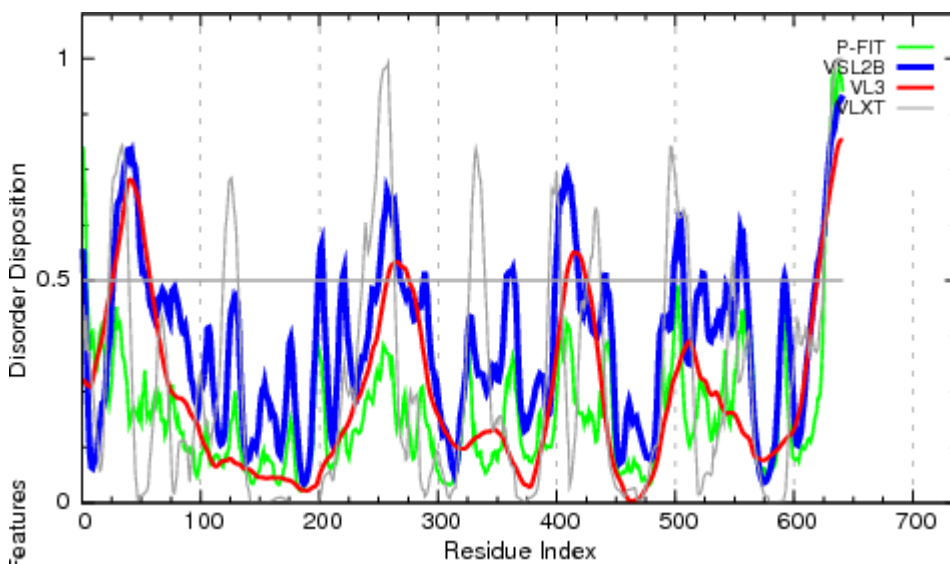

| =====PONDR VSL2 STATISTICS=====        |                                  |
|----------------------------------------|----------------------------------|
| Predicted residues: 641                | Number Disordered Regions: 13    |
| Number residues disordered: 124        | Longest Disordered Region: 28    |
| Overall percent disordered: 19.34      | Average Prediction Score: 0.3630 |
| Predicted disorder segment [27]-[54]   | Average Strength= 0.6757         |
| Predicted disorder segment [200]-[203] | Average Strength= 0.5562         |
| Predicted disorder segment [220]-[221] | Average Strength= 0.5163         |
| Predicted disorder segment [251]-[268] | Average Strength= 0.6264         |
| Predicted disorder segment [289]-[289] | Average Strength= 0.5192         |
| Predicted disorder segment [358]-[364] | Average Strength= 0.5156         |
| Predicted disorder segment [399]-[418] | Average Strength= 0.6553         |
| Predicted disorder segment [441]-[441] | Average Strength= 0.5179         |
| Predicted disorder segment [499]-[506] | Average Strength= 0.5902         |
| Predicted disorder segment [523]-[524] | Average Strength= 0.5158         |
| Predicted disorder segment [552]-[559] | Average Strength= 0.5641         |
| Predicted disorder segment [592]-[592] | Average Strength= 0.5069         |
| Predicted disorder segment [619]-[641] | Average Strength= 0.7449         |

## ANCHOR:

| Predicted Disordered Binding Regions |      |     |        |
|--------------------------------------|------|-----|--------|
|                                      | From | To  | Length |
| None                                 |      |     |        |
| Filtered Regions                     |      |     |        |
|                                      | From | To  | Length |
| 1                                    | 5    | 18  | 14     |
| 2                                    | 474  | 477 | 4      |
| 3                                    | 479  | 479 | 1      |
| 4                                    | 570  | 586 | 17     |

## ModPred and PROSITE:

ModPred: Amidation (A14, F316, S405, R507, I571), Proteolytic cleavage (Q200, R394, R560, D561, D627, F630, R641), O-linked glycosylation (S256), Phosphorylation (T259), ADP-ribosylation (R270)

PROSITE: Multicopper oxidase2 (586-597, PROSITE entry PS00080)

Multicopper oxidases [1,2] are enzymes that possess three spectroscopically different copper centers. These centers are called: type 1 (or blue), type 2 (or normal) and type 3 (or coupled binuclear).

Consensus pattern: H-C-H-x(3)-H-x(3)-[AG]-[LM]

The first 2 H's are copper type 3 binding residues; The C, the third H, and L or M are copper type 1 ligands. The enzymes that belong to this family are:

- Laccase (EC 1.10.3.2) (urishiol oxidase), an enzyme found in fungi and plants, which oxidizes many different types of phenols and diamines.
- In addition to the above enzyme there are a number of proteins which, on the basis of sequence similarities, can be said to belong to this family. These proteins are:
- Copper resistance protein A (copA) from a plasmid in *Pseudomonas syringae*. This protein seems to be involved in the resistance of the microbial host to copper.
- Yeast FET3, which is required for ferrous iron uptake.
- Yeast hypothetical protein YFL041w and SpAC1F7.08, the fission yeast homolog.

## Structural modelling:

| Name                                                                                                         | Title             | Identity | Method      | Oligo State | Ligands                                         |
|--------------------------------------------------------------------------------------------------------------|-------------------|----------|-------------|-------------|-------------------------------------------------|
|  <a href="#">3v9e.1.A</a> | Laccase           | 27.48    | X-ray, 1.7Å | monomer     | 5 x <u>NAG</u> , 3 x <u>CU</u> , 1 x <u>MAN</u> |
|  <a href="#">1aso.1.A</a> | ASCORBATE OXIDASE | 27.23    | X-ray, 2.2Å | homo-dimer  | 2 x <u>NAG</u> , 9 x <u>CU</u> , 2 x <u>OH</u>  |
|  <a href="#">5mew.1.A</a> | Laccase 2         | 28.06    | X-ray, 1.3Å | monomer     | 4 x <u>NAG</u> , 4 x <u>CU</u> , 2 x <u>OXY</u> |

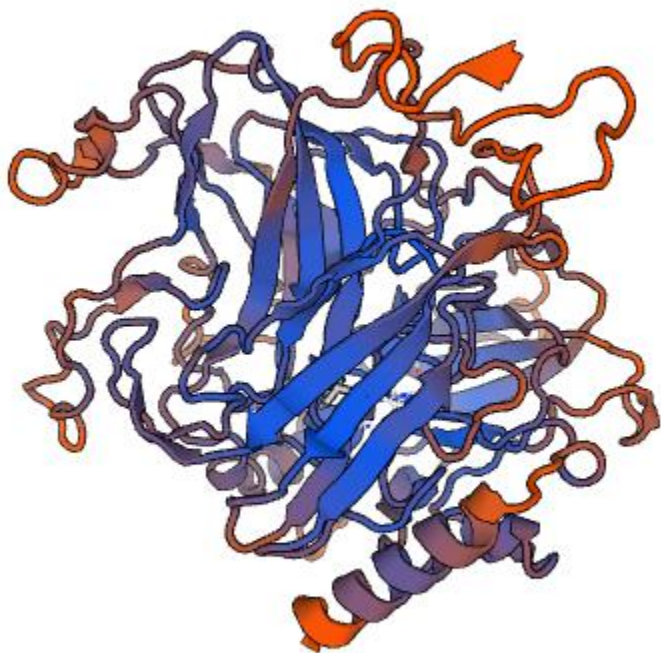

Model #1: Residues 50-629 of MVLG\_02184T0 with 3v9e.1.A (27.48% sequence identity) as a template

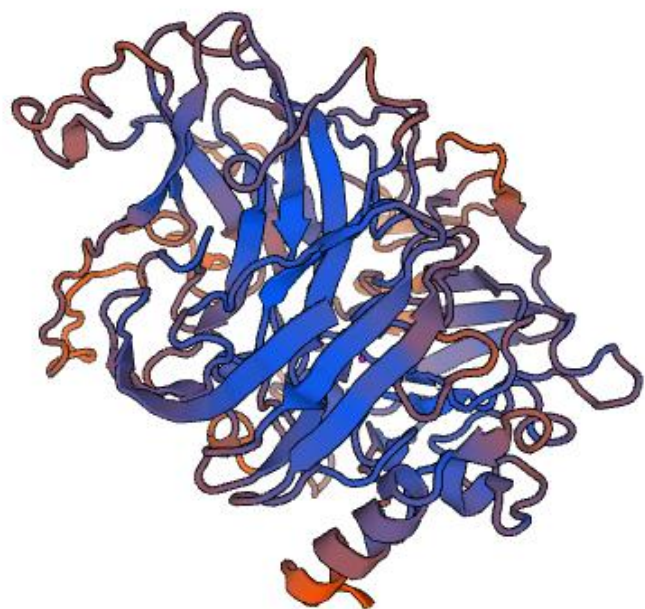

Model #2: Residues 95-631 of MVLG\_02184T0 with 5mew.1.A (28.06% sequence identity) as a template

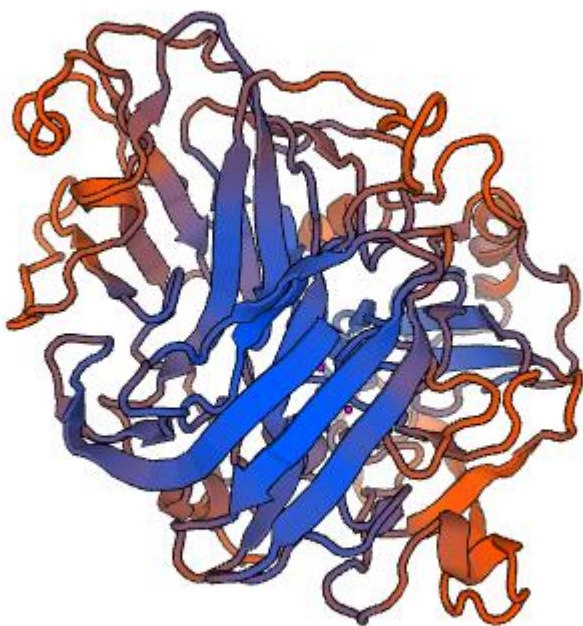

Model #3: Residues 94-598 of MVLG\_02184T0 with 1aso.1.A (27.23% sequence identity) as a template

> MVLG\_07060T0 (18.95%)- 496 aa

**MMWSTLLVPITAALAATAVHA**ATNHAAVGAHSSLDHNKGSQNVAKGDISKGNTFQVISHPDFPN  
HKLRIKESQLCGDKEKIYSGFLDIAEHTLFFAFAESRDKPDEDSVLLWLNGGPGCSSMAGFLLENG  
PCLVTNGGNSSTFNPYSWNSNANMIFLDSPVKVGFSNARKPVDTSRKTAEIDIYAFMQLFYQVFPRF  
AMLDFILAGESYAGMYIPQVASVIVQKNKLVDGASSNTIYVPLVSMAIGNGFVEIVSALSAEVDVDFAC  
GKGVHKAIIYNSSTCDALYPQIPICSRSVATCRQNLTRQNCQQAELDCFVLGAPFDNTGLNPYDVTK  
KCDRSPSKDGPLCYKEASWLPYILNRPDIRAKLGVHAKAKPFEECSDSVHTAFLLSGDWVVNTPAV  
LSDLLEAGIKLLLYVGVNDFICNYLGVNRWTTAMKWSGQDQYSKAPFHEFRMPNGTVVGLTKSYG  
PLTYLEVKDAGHMVPRDKPDEALEMIKTWIRGDQF

PONDR:

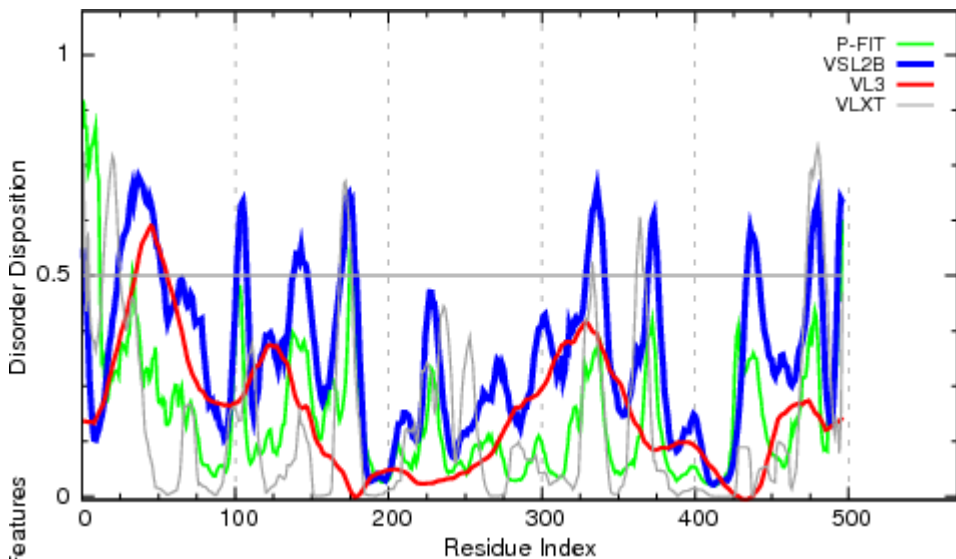

=====PONDR VSL2 STATISTICS=====

|                                        |                                  |
|----------------------------------------|----------------------------------|
| Predicted residues: 496                | Number Disordered Regions: 9     |
| Number residues disordered: 94         | Longest Disordered Region: 29    |
| Overall percent disordered: 18.95      | Average Prediction Score: 0.3250 |
| Predicted disorder segment [24]-[52]   | Average Strength= 0.6341         |
| Predicted disorder segment [101]-[107] | Average Strength= 0.6034         |
| Predicted disorder segment [138]-[147] | Average Strength= 0.5319         |
| Predicted disorder segment [170]-[178] | Average Strength= 0.6156         |
| Predicted disorder segment [329]-[340] | Average Strength= 0.6186         |
| Predicted disorder segment [370]-[375] | Average Strength= 0.5888         |
| Predicted disorder segment [434]-[441] | Average Strength= 0.5633         |
| Predicted disorder segment [475]-[482] | Average Strength= 0.6040         |
| Predicted disorder segment [493]-[496] | Average Strength= 0.6175         |

ANCHOR:

| Predicted Disordered Binding Regions |      |    |        |
|--------------------------------------|------|----|--------|
|                                      | From | To | Length |
| None                                 |      |    |        |

| Filtered Regions |      |    |        |
|------------------|------|----|--------|
|                  | From | To | Length |
| 1                | 1    | 3  | 3      |
| 2                | 6    | 8  | 3      |
| 3                | 94   | 96 | 3      |

### ModPred and PROSITE:

ModPred: Proteolytic cleavage (H31, D108, S109, L111, W113, K362, H473), Amidation (Y465)

PROSITE: CARBOXYPEPT\_SER\_SER( Serine carboxypeptidases, serine active site, 204-211, PROSITE entry PS00131), CARBOXYPEPT\_SER\_HIS (Serine carboxypeptidases, histidine active site, 463-480, PROSITE entry PS00560)

All known carboxypeptidases are either metallo carboxypeptidases or serine carboxypeptidases (EC 3.4.16.5 and EC 3.4.16.6). The catalytic activity of the serine carboxypeptidases, is provided by a charge relay system involving an aspartic acid residue hydrogen-bonded to a histidine, which is itself hydrogen-bonded to a serine. Fungal Proteins known to be serine carboxypeptidases are:

- Yeast carboxypeptidase Y (YSCY) (gene PRC1), a vacuolar protease involved in degrading small peptides.
- Yeast KEX1 protease, involved in killer toxin and  $\alpha$ -factor precursor processing.
- Fission yeast sxa2, a probable carboxypeptidase involved in degrading or processing mating pheromones.
- Penicillium janthinellum carboxypeptidase S1
- Aspergillus niger carboxypeptidase pepF.
- Aspergillus satoii carboxypeptidase cpdS.
- Yeast hypothetical protein YBR139w.

### Structural modelling:

| Name                                                                                                        | Title                                        | Identity | Method      | Oligo State         | Ligands                                                                        |
|-------------------------------------------------------------------------------------------------------------|----------------------------------------------|----------|-------------|---------------------|--------------------------------------------------------------------------------|
|  <a href="#">1ysc.1.A</a> | SERINE CARBOXYPEPTIDASE                      | 37.35    | X-ray, 2.8Å | monomer             | 3 x <a href="#">NDG</a>                                                        |
|  <a href="#">1gxs.1.B</a> | P-(S)-HYDROXYMANDELONITRILE LYASE<br>CHAIN B | 23.97    | X-ray, 2.3Å | hetero-<br>oligomer | 2 x <a href="#">BEZ</a> , 2 x <a href="#">NAG</a> , 2<br>x <a href="#">DKA</a> |

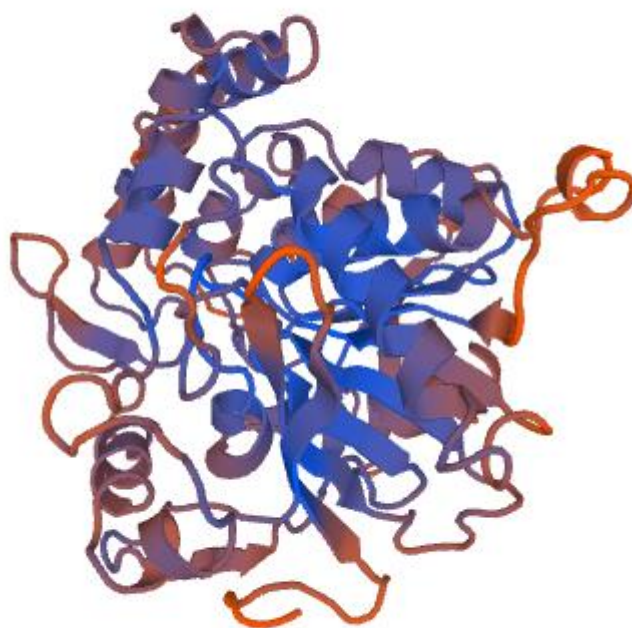

Model #1: Residues 72-495 of MVLG\_07060T0 with 1ysc.1.A (37.35% sequence identity) as a template

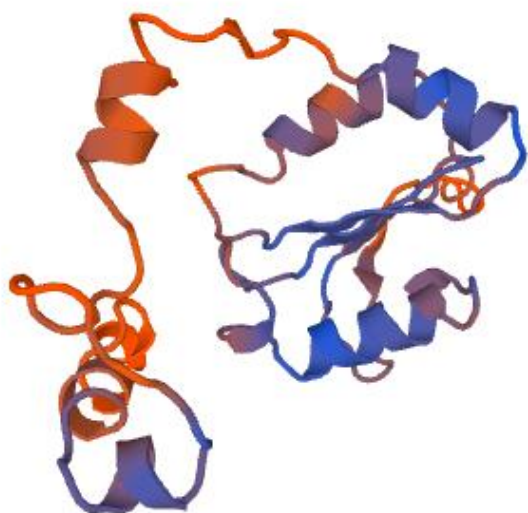

Model #2: Residues 341-496 of MVLG\_07060T0 with 1gxs.1.B (23.97% sequence identity) as a template

# > MVLG\_01474T0 (16.32%)- 380 aa

**MLSKLRNVSVAAALLFAGLAIA**APAPVSNSSLEARHGKQNLLTPKVMIIISMFAPERAVWIKPMKL  
VHNVSVVGLSPLYYPYVACNNEYDVCIMTTGEAEINAAASMMALALSPLFCLQHTYFLIAGIGGVNP  
YAGTLGSAAFARFAVQVALEYELDARQIPSNWTTGYWMQNTAGPGQLSATKDLYGTELFEVNTNL  
LAKAYSAAKGVTLNDSTTAQAYRQKFDYAPANQPPQVILGDVATSDVYYAGTLLSESFNGNYTALL  
TNGTGKYTTTAQEDNATLES MVRATKAGLLDYARVILRTCSDFD RAPP GKVTAYDAFFANQGGFE  
LALQNLYIAGKPVVDMILKDWSTFKNGVQPQSKGNGSYYGDDLGLRSGPALA

## PONDR:

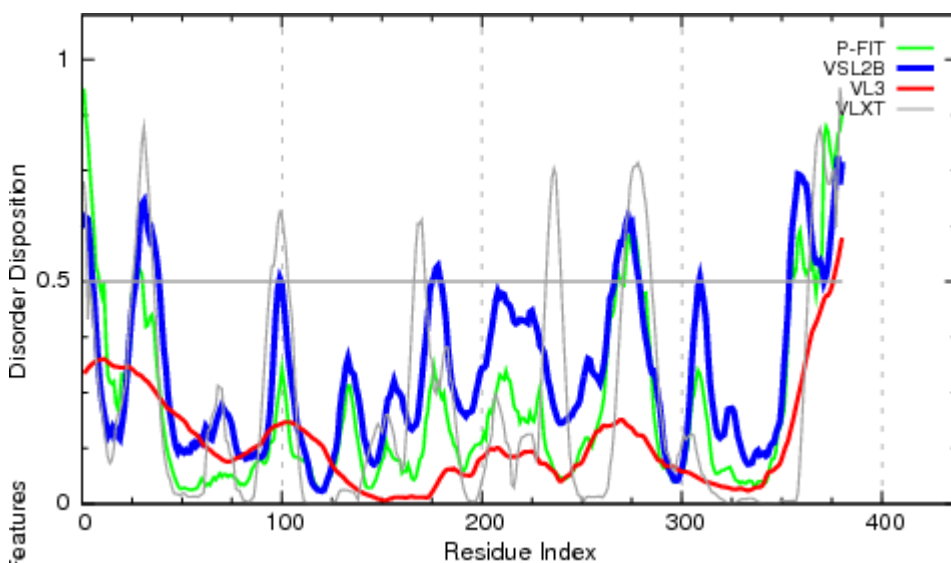

| =====PONDR VSL2 STATISTICS=====        |                                  |
|----------------------------------------|----------------------------------|
| Predicted residues: 380                | Number Disordered Regions: 7     |
| Number residues disordered: 62         | Longest Disordered Region: 27    |
| Overall percent disordered: 16.32      | Average Prediction Score: 0.2960 |
| Predicted disorder segment [1]-[5]     | Average Strength= 0.6035         |
| Predicted disorder segment [27]-[38]   | Average Strength= 0.6006         |
| Predicted disorder segment [99]-[99]   | Average Strength= 0.5068         |
| Predicted disorder segment [176]-[179] | Average Strength= 0.5212         |
| Predicted disorder segment [267]-[278] | Average Strength= 0.5886         |
| Predicted disorder segment [309]-[309] | Average Strength= 0.5085         |
| Predicted disorder segment [354]-[380] | Average Strength= 0.6394         |

## ANCHOR:

| Predicted Disordered Binding Regions |      |    |        |
|--------------------------------------|------|----|--------|
|                                      | From | To | Length |
| None                                 |      |    |        |

## ModPred and PROSITE:

ModPred: GPI anchor amidation (N29), Amidation (A227, Q232, Y366), Proteolytic cleavage (R374).

PROSITE: No identified domain recognition sites.

## Structural modelling:

| Name                                                                                                       | Title                                                        | Identity | Method      | Oligo State | Ligands                                           |
|------------------------------------------------------------------------------------------------------------|--------------------------------------------------------------|----------|-------------|-------------|---------------------------------------------------|
|  <a href="#">1zos.1.A</a> | 5'-methylthioadenosine / S-adenosylhomocysteine nucleosidase | 18.78    | X-ray, 1.6Å | homo-dimer  | 2 x <a href="#">MTM</a>                           |
|  <a href="#">4g89.1.B</a> | 5'-methylthioadenosine/S-adenosylhomocysteine nucleosidase   | 17.65    | X-ray, 2.1Å | homo-dimer  | 1 x <a href="#">SAH</a> , 1 x <a href="#">ADE</a> |

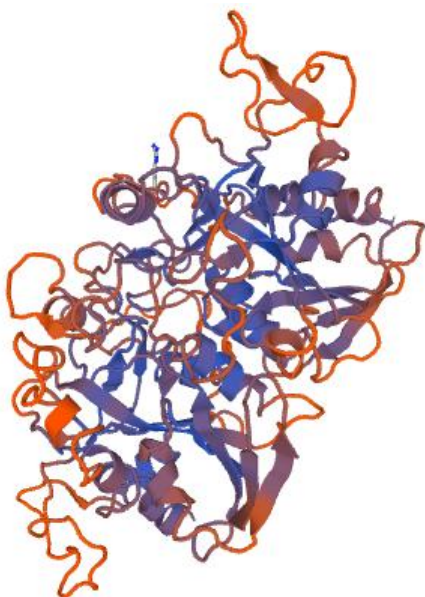

Model #1: Residues 45-349 of MVLG\_01474T0 with 1zos.1.A (18.78% sequence identity) as a template

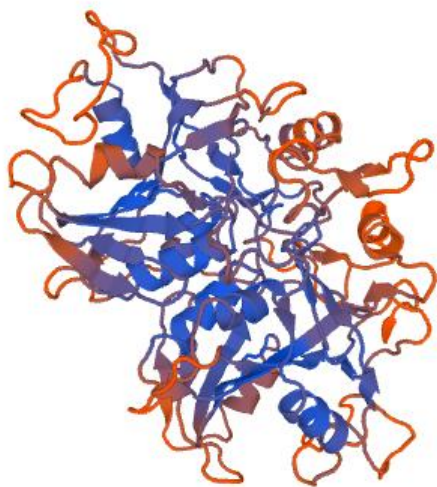

Model #2: Residues 44-311 of MVLG\_01474T0 with 4g89.1.B (17.65% sequence identity) as a template

> MVLG\_00784T0 (15.81%)- 215 aa

MLVSFKPFGLVWLCMSV FVSATFGRVTKDPKTPIVKGPKAPVVKEPKTPLVFQECKKYTYSKD  
DIGKLFKRKGVEGKATFFINGYNYGCIYNKENVNALRARYHEGHADLVNLSSVQIVKQVELLET  
AVERILGVRLGMFIAPYDSIDEKAAKVIRDKGYKIVRWSLDSGDTTFYLRPQSSVNLIRK  
WIKKASGKSGI GLFDEVGFIFLTCHGSE

PONDR:

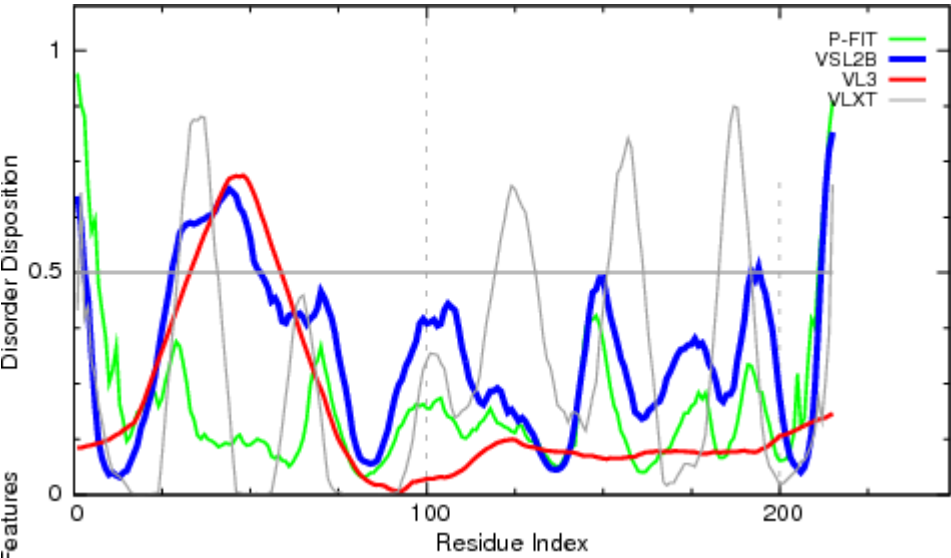

| -----PONDR VSL2 STATISTICS-----        |                                  |  |  |
|----------------------------------------|----------------------------------|--|--|
| Predicted residues: 215                | Number Disordered Regions: 5     |  |  |
| Number residues disordered: 34         | Longest Disordered Region: 25    |  |  |
| Overall percent disordered: 15.81      | Average Prediction Score: 0.3172 |  |  |
| Predicted disorder segment [1]-[3]     | Average Strength= 0.5966         |  |  |
| Predicted disorder segment [28]-[52]   | Average Strength= 0.6149         |  |  |
| Predicted disorder segment [192]-[192] | Average Strength= 0.5020         |  |  |
| Predicted disorder segment [194]-[194] | Average Strength= 0.5114         |  |  |
| Predicted disorder segment [212]-[215] | Average Strength= 0.7071         |  |  |

ANCHOR:

| Predicted Disordered Binding Regions |      |    |        |
|--------------------------------------|------|----|--------|
|                                      | From | To | Length |
| None                                 |      |    |        |

ModPred and PROSITE:

ModPred: Sumoylation (K6), Proteolytic cleavage (T22, F23, R25), Acetylation (K62, K66), Methylation (K69), Amidation (I89, V95, Y102), Ubiquitination (K92), Pupylation (K152).

PROSITE: No identified domain recognition sites.

Structural modelling:

| Name                                                                                                                                                              | Title | Identity | Method      | Oligo State   | Ligands                |
|-------------------------------------------------------------------------------------------------------------------------------------------------------------------|-------|----------|-------------|---------------|------------------------|
|  <a href="#">2iw0.1.A</a> CHITIN DEACETYLASE                                     |       | 26.88    | X-ray, 1.8Å | monomer       | 1 x <a href="#">ZN</a> |
|  <a href="#">3qbu.1.A</a> Putative uncharacterized protein                       |       | 16.81    | X-ray, 2.6Å | homo-tetramer | 4 x <a href="#">ZN</a> |
|  <a href="#">3l6u.1.A</a> ABC-TYPE SUGAR TRANSPORT SYSTEM PERIPLASMIC COMPONENT  |       | 17.39    | X-ray, 1.9Å | homo-dimer    | None                   |
|  <a href="#">2eqo.1.A</a> TNF receptor-associated factor 3-interacting protein 1 |       | 13.21    | NMR         | monomer       | None                   |

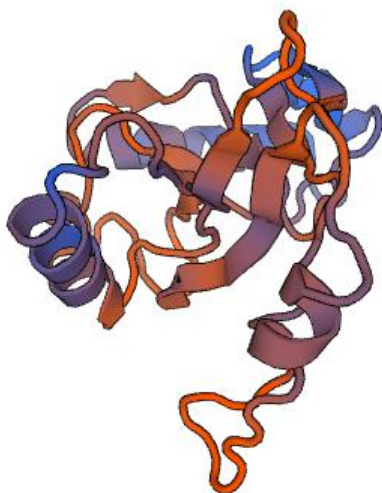

Model #1: Residues 37-203 of MVLG\_00784T0 with 2iw0.1.A (26.88% sequence identity) as a template

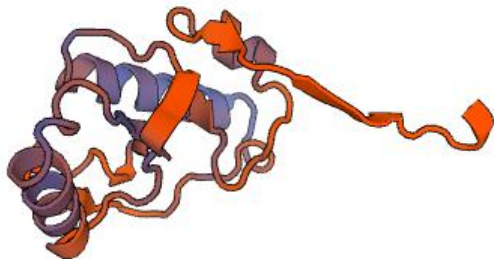

Model #2: Residues 48-173 of MVLG\_00784T0 with 3qbu.1.A (16.81% sequence identity) as a template

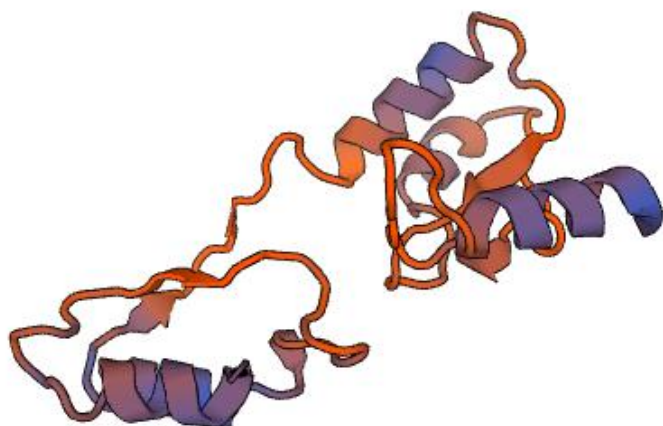

Model #3: Residues 61-191 of MVLG\_00784T0 with 3l6u.1.A (17.39% sequence identity) as a template

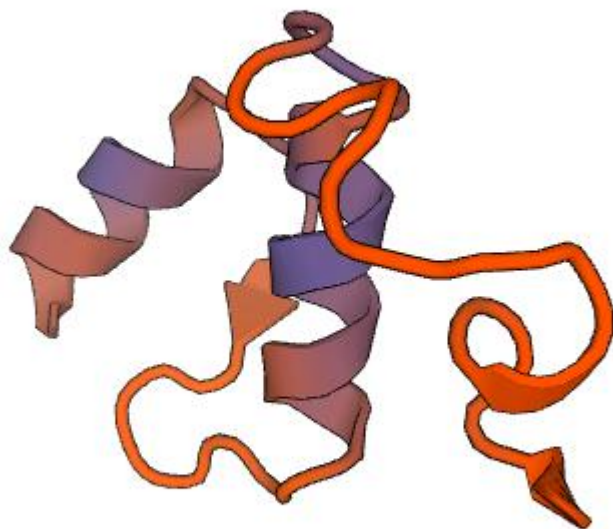

Model #4: Residues 121-173 of MVLG\_00784T0 with 2eqo.1.A (13.21% sequence identity) as a template

> MVLG\_06541T0 (15.48%)- 84 aa

**MRFS**LI**VLATLLVGFAAA**APVLQSDIFKDTQKADRAQNLVHRLMVRVSTVYSQCTHNCEDEYAR  
YKIGPYELIACKKGCQSDAI

## PONDR:

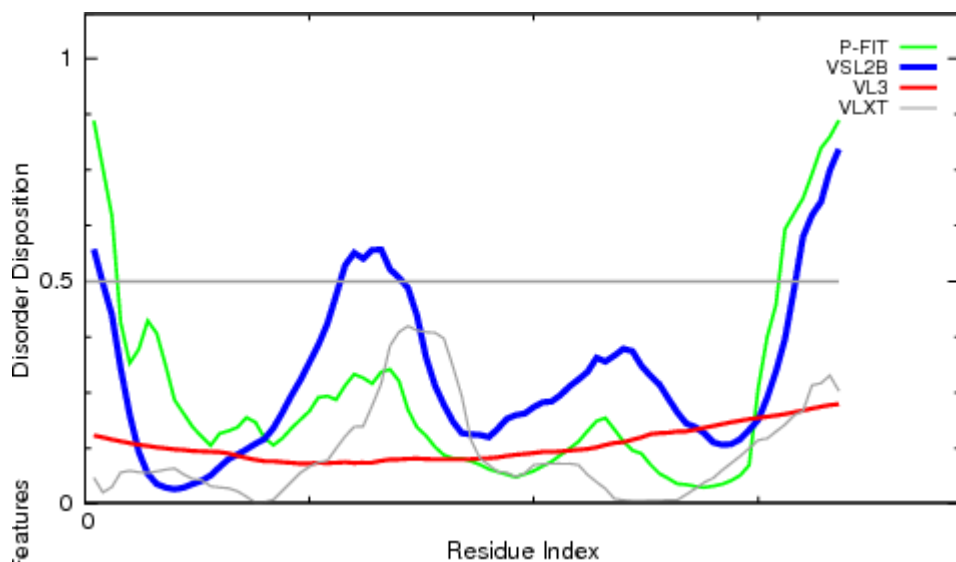

### -----PONDR VSL2 STATISTICS-----

|                                      |                                  |
|--------------------------------------|----------------------------------|
| Predicted residues: 84               | Number Disordered Regions: 2     |
| Number residues disordered: 13       | Longest Disordered Region: 7     |
| Overall percent disordered: 15.48    | Average Prediction Score: 0.2829 |
| Predicted disorder segment [29]-[35] | Average Strength= 0.5466         |
| Predicted disorder segment [80]-[84] | Average Strength= 0.6944         |

## ANCHOR:

| Predicted Disordered Binding Regions |      |    |        |
|--------------------------------------|------|----|--------|
|                                      | From | To | Length |
| None                                 |      |    |        |

## ModPred and PROSITE:

ModPred: Amidation (Y70).

PROSITE: No identified domain recognition sites.

## Structural modelling:

| Name                                                                                                         | Title                          | Identity | Method | Oligo State | Ligands |
|--------------------------------------------------------------------------------------------------------------|--------------------------------|----------|--------|-------------|---------|
|  2m7g.1.A                 | Geopilin domain 1 protein      | 21.62    | NMR    | monomer     | None    |
|  2lqx.1.A                 | Trypsin inhibitor BWI-2c       | 32.35    | NMR    | monomer     | None    |
|  <a href="#">2l03.1.A</a> | Ly-6/neurotoxin-like protein 1 | 22.58    | NMR    | monomer     | None    |

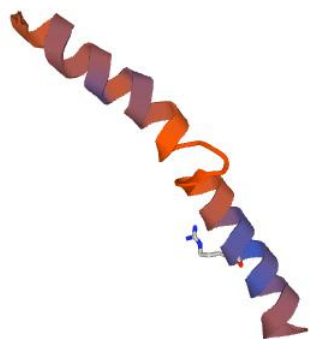

Model #1: Residues 6-44 of MVLG\_06541T0 with 2m7g.1.A (21.62% sequence identity) as a template

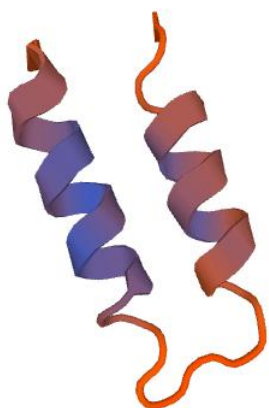

Model #2: Residues 29-64 of MVLG\_06541T0 with 2lqx.1.A (32.35% sequence identity) as a template

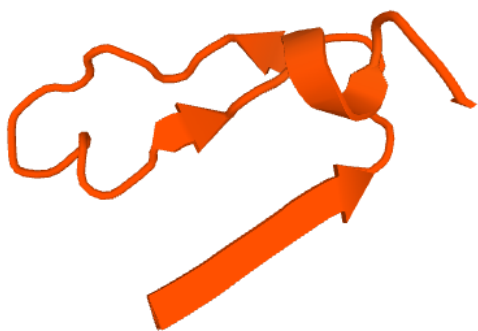

Model #3: Residues 48-82 of MVLG\_06541T0 with 2l03.1.A (22.58% sequence identity) as a template

> MVLG\_01897T0 (14.81%)- 385 aa

MLLSTTLLASLLVAVSAKKGLLAAYYPASQVDAIDWNVTDIGYYMAAVTAKNGLAFPAGKPGL  
ADFLVRAHAHKKKAVLSIGGPEGSQYFSSLVRTETARAKFVEQILEVGRKYNTDGVDISWQFPTVH  
GNPKNEIDPKDSANLLKLLKDLRRSRPKEWLSAAVSPNGIFAPSGTTTLSNYQDFAEVVDAFNVMA  
YHYVGAWNEWTGPDSPSHQCGTGRSVTTDIERFIKAGFVANKIMLGIPSFSGKAFTLHNNTLRTSVV  
YGDQQVPKKYQIRIRQRYETYNGADNTFVKLKAQGILKGEDGLTAGRGYKRHYDHCSRTPFLFNPG  
TKSFITYLDARSASYRAQIAVQQEYLGVFVSSIGLDNLAFNAIDKALKTPIDGFATD

PONDR:

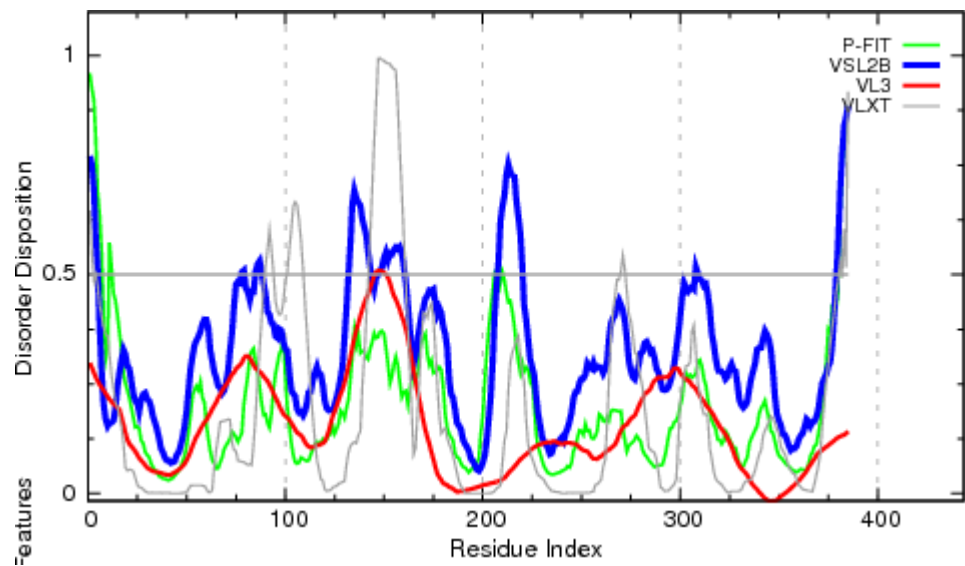

| =====PONDR VSL2 STATISTICS=====        |                                  |
|----------------------------------------|----------------------------------|
| Predicted residues: 385                | Number Disordered Regions: 8     |
| Number residues disordered: 57         | Longest Disordered Region: 13    |
| Overall percent disordered: 14.81      | Average Prediction Score: 0.3237 |
| Predicted disorder segment [1]-[5]     | Average Strength= 0.6648         |
| Predicted disorder segment [78]-[79]   | Average Strength= 0.5072         |
| Predicted disorder segment [85]-[88]   | Average Strength= 0.5170         |
| Predicted disorder segment [132]-[143] | Average Strength= 0.6103         |
| Predicted disorder segment [148]-[160] | Average Strength= 0.5425         |
| Predicted disorder segment [208]-[220] | Average Strength= 0.6601         |
| Predicted disorder segment [308]-[309] | Average Strength= 0.5091         |
| Predicted disorder segment [380]-[385] | Average Strength= 0.7677         |

ANCHOR:

| Predicted Disordered Binding Regions |      |     |        |
|--------------------------------------|------|-----|--------|
|                                      | From | To  | Length |
| None                                 |      |     |        |
| Filtered Regions                     |      |     |        |
|                                      | From | To  | Length |
| 1                                    | 194  | 198 | 5      |

## ModPred and PROSITE:

ModPred: Amidation (A9, P209, Y283, S340, Y353), Ubiquitination (K52), Proteolytic cleavage (D66, R154, R220), Acetylation (K248, K300), Pupylation (K376).

PROSITE: No identified domain recognition sites.

## Structural modelling:

| Name                                                                                                       | Title     | Identity | Method      | Oligo State | Ligands |
|------------------------------------------------------------------------------------------------------------|-----------|----------|-------------|-------------|---------|
|  <a href="#">4txg.1.A</a> | Chitinase | 21.02    | X-ray, 1.8Å | monomer     | 11 x CS |

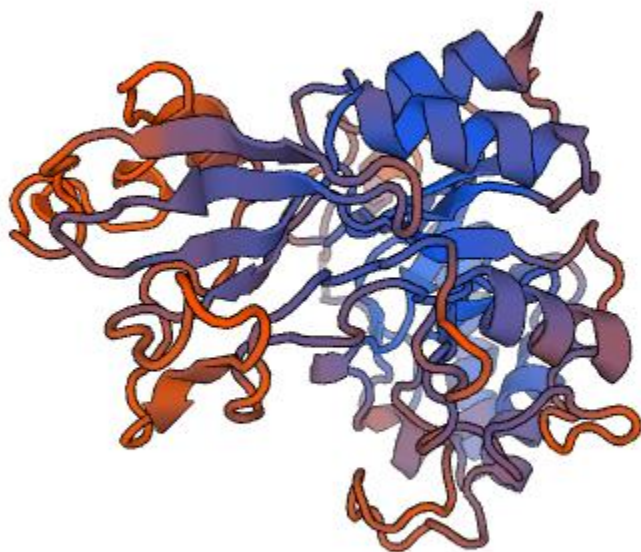

Model #1: Residues 17-377 of MVLG\_01897T0 with 4txg.1.A (21.02% sequence identity) as a template

# > MVLG\_06973T0 (12.58%)- 604 aa

**MWALGGIAGSVLWICAVNG**QGSSYAPRRVRCPTDGPLVKSTGSPLAGNQFLESREATYQAARWN  
KVLEPLYLKYLGNGQDTGYSTAQIATIVKHEPRIGTACSGGGLRASLYCAGTLSALDSRSRSHAAPV  
LQLSAYMTGLSGGSLATSLATSNLGPSTSIYDIVLGKNGAPGWKLDLNLNFPSTIKHLIPFNANIIRDLH  
EKNRAHFSVTLIDYWGRLLGHHFLPGTTRASFFSQLAPNDNGLLFDAINSTSKFKEFEMPYPIVTTTS  
RVRPWDQFKVVHDYIPAINTVFEISPYSGSFDPSLSAHIPT EYMGSYVEQTQTGVARTCVNGFDSAS  
FIMGCSAGLFTAIESMLQPDMKTFRRLLSLIHRVSKEEKLDILTSKVPNTFYGYNSGLMGSRRFESAE  
NKNLYLTDGGMNGENIPLAPLLVKARRLDITFAIDASQDTKMSWPNGVSLHRTWERINRTANGYSYD  
FPPVPSKPYDFLMGGLTRRPVFFGCNVKDARVDKPGNYPILIYLPNAPVPHSGYSTNTKTSQMEYSIS  
DTEAFLNTVQANAMKGYPGGDAVVDREYKTALKCATVDRARQGRGNMARSAICQIQMQRYCWPPPL  
KA

## PONDR:

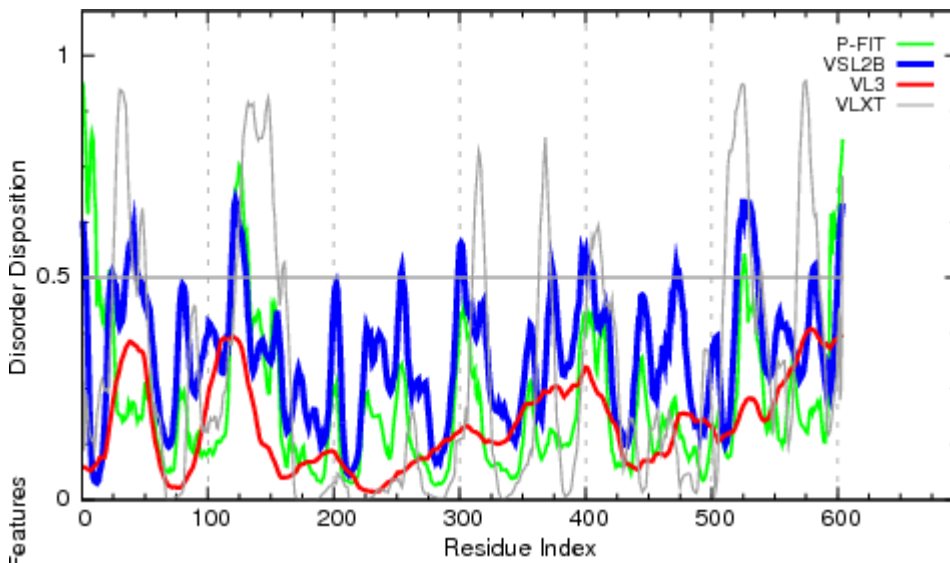

| =====PONDR VSL2 STATISTICS=====        |                                  |
|----------------------------------------|----------------------------------|
| Predicted residues: 604                | Number Disordered Regions: 12    |
| Number residues disordered: 76         | Longest Disordered Region: 17    |
| Overall percent disordered: 12.58      | Average Prediction Score: 0.3269 |
| Predicted disorder segment [1]-[3]     | Average Strength= 0.5765         |
| Predicted disorder segment [23]-[25]   | Average Strength= 0.5060         |
| Predicted disorder segment [35]-[44]   | Average Strength= 0.5536         |
| Predicted disorder segment [119]-[130] | Average Strength= 0.6016         |
| Predicted disorder segment [253]-[254] | Average Strength= 0.5118         |
| Predicted disorder segment [299]-[303] | Average Strength= 0.5561         |
| Predicted disorder segment [373]-[374] | Average Strength= 0.5188         |
| Predicted disorder segment [396]-[406] | Average Strength= 0.5331         |
| Predicted disorder segment [471]-[474] | Average Strength= 0.5104         |
| Predicted disorder segment [520]-[536] | Average Strength= 0.6177         |
| Predicted disorder segment [580]-[582] | Average Strength= 0.5206         |
| Predicted disorder segment [601]-[604] | Average Strength= 0.6225         |

## ANCHOR:

| Predicted Disordered Binding Regions |      |     |        |
|--------------------------------------|------|-----|--------|
|                                      | From | To  | Length |
| 1                                    | 491  | 496 | 6      |

| Filtered Regions |      |     |        |
|------------------|------|-----|--------|
|                  | From | To  | Length |
| 1                | 11   | 15  | 5      |
| 2                | 70   | 72  | 3      |
| 3                | 510  | 514 | 5      |

### ModPred and PROSITE:

ModPred: Amidation (K39, E373), Acetylation (K73), Sumoylation (K255)

PROSITE: PLA2C (PLA2c domain profile, 30-604, PROSITE entry PS51210)

The PLA2c domain is the catalytic lipase domain in cytosolic phospholipase A2 (cPLA2) (EC 3.1.1.4) and lysophospholipase or phospholipase B (PLB) (EC 3.1.1.5) of vertebrates and fungi. It catalyzes the carboxylic ester hydrolysis of glycerophospholipids or lysophospholipids. The mammalian cPLA2 group IVA enzymes cleave intracellular phospholipid membranes to produce lipid mediators, which also play a role in inflammatory diseases such as asthma and arthritis. This enzyme contains a N-terminal calcium-binding C2 domain (see <PDOC00380>) that presents the catalytic domain to the membrane. Fungal secreted lysophospholipase/PLB can possess three different enzymatic activities, the hydrolase activity of phospholipase, lysophospholipase and a lysophospholipase transacylase activity.

Some fungal proteins known to contain a PLA2c domain:

- Fungal lysophospholipases/PLB, which are considered to be important for virulence of pathogenic fungi.
- Yeast sporulation-specific protein 1 (SPO1), which is required for meiosis.

### Structural modelling:

| Name                                                                                                         | Title                            | Identity | Method      | Oligo State | Ligands |
|--------------------------------------------------------------------------------------------------------------|----------------------------------|----------|-------------|-------------|---------|
|  <a href="#">5iz5.1.A</a> | Cytosolic phospholipase A2 delta | 19.26    | X-ray, 2.2Å | monomer     | None    |

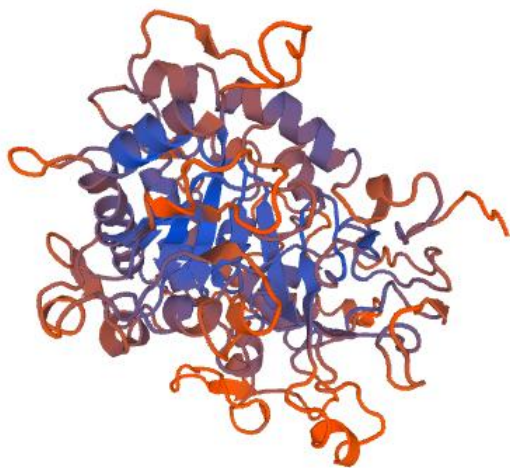

Model #1: Residues 31-577 of MVLG\_06973T0 with 5iz5.1.A (19.26% sequence identity) as a template

## Mostly ordered proteins (<10% disordered residues by PONDR® VSL2 analysis)

> MVLG\_01005T0 (9.67%)- 331 aa

**MHYTRLCLLCAALSNA**PILLSARPQITMSADLSLECFIATTGLLSSPFARCADASGFLAALDAKIGL  
ADALSDWLNNFCKDTCPPDDARAKAWSGLEGGADELAREIALPSVLLGTGHLRSSATAVQCPFRF  
DNFVESNPILNARSTAVVANYDVLKRSACTGSVSRQSYCFVEFVKDLEEANKRNFTMSVDLLSPTC  
AELNAVPRSKLCTLCNQMLFEMMVKLLSRPIDRVTLTDHARQACGLAFASLSALQADFPLRPVGGQ  
FDQAVARYTAAAIKDLDQHNSTPSTPTTSSAYSSRTLRRSTFALDTVVKAVAPTAAATILLYGWVQ

PONDR:

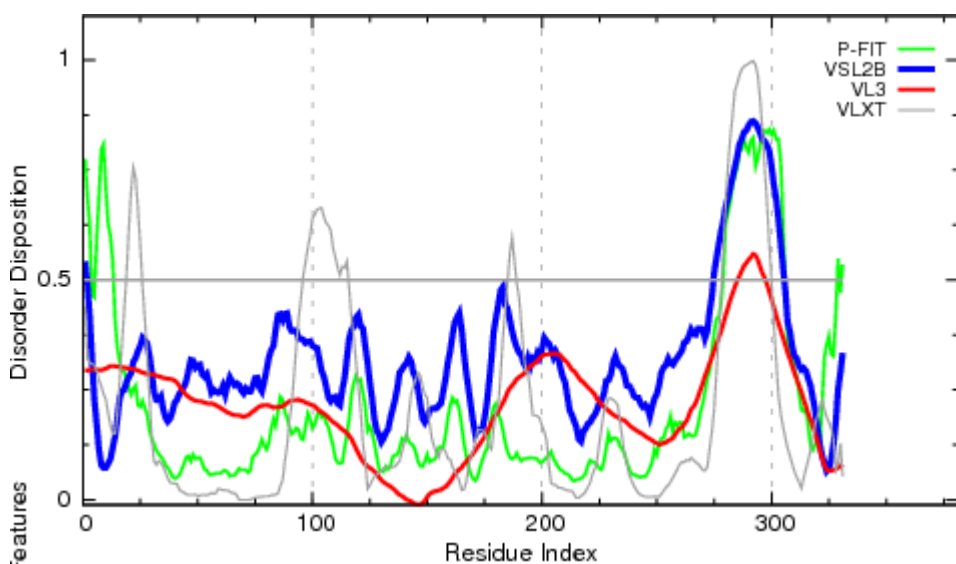

### PONDR VSL2 STATISTICS

|                                        |                                  |
|----------------------------------------|----------------------------------|
| Predicted residues: 331                | Number Disordered Regions: 1     |
| Number residues disordered: 32         | Longest Disordered Region: 31    |
| Overall percent disordered: 9.67       | Average Prediction Score: 0.3224 |
| Predicted disorder segment [275]-[305] | Average Strength= 0.7347         |

ANCHOR:

| Predicted Disordered Binding Regions |      |     |        |
|--------------------------------------|------|-----|--------|
|                                      | From | To  | Length |
| None                                 |      |     |        |
| Filtered Regions                     |      |     |        |
|                                      | From | To  | Length |
| 1                                    | 325  | 331 | 7      |

ModPred and PROSITE:

ModPred: Pupylation (K177, K278), ADP-ribosylation (R206), N-linked glycosylation (N284), O-linked glycosylation (S293), Proteolytic cleavage (R304), Amidation (Y327), Pyrrolidone carboxylic acid (Q331).

PROSITE: No identified domain recognition sites.

## Structural modelling:

| Name                                                                                                       | Title                                                  | Identity | Method      | Oligo State     | Ligands |
|------------------------------------------------------------------------------------------------------------|--------------------------------------------------------|----------|-------------|-----------------|---------|
|  <a href="#">3gxv.1.A</a> | Replicative DNA helicase                               | 22.50    | X-ray, 2.2Å | hetero-oligomer | None    |
|  <a href="#">5n9j.1.D</a> | Mediator of RNA polymerase II transcription subunit 21 | 25.71    | X-ray, 3.4Å | hetero-oligomer | None    |
|  <a href="#">3ajb.1.B</a> | Peroxisomal biogenesis factor 19                       | 22.22    | X-ray, 2.5Å | hetero-oligomer | None    |

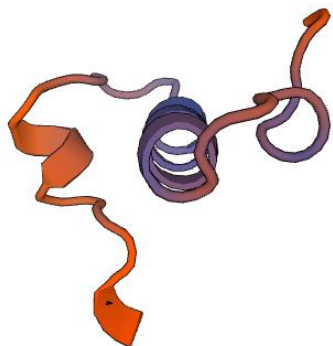

Model #1: Residues 202-241 of MVLG\_01005T0 with 3gxv.1.A (22.50% sequence identity) as a template

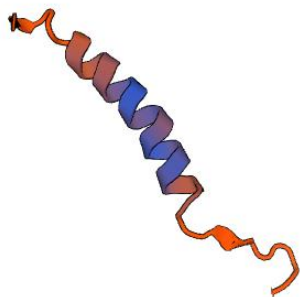

Model #2: Residues 230-264 of MVLG\_01005T0 with 5n9j.1.D (25.71% sequence identity) as a template

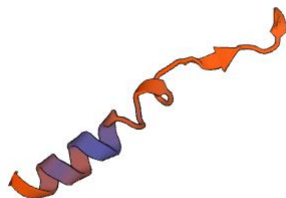

Model #3: Residues 266-291 of MVLG\_01005T0 with 3ajb.1.B (22.22% sequence identity) as a template

**Table S3: Primers used for PCR and sequencing**

| Primer               | Sequence (5'→3')                              | Usage                |
|----------------------|-----------------------------------------------|----------------------|
| MVLG_04106F          | GCC GAA TTC GCT GAC GCG ACC AAA CAG GCC TCC   | Yeast two hybrid     |
| MVLG_04106R          | GAC GGA TCC TCA ACA ACC TTC GGG CTC GGG TTG   | Yeast two hybrid     |
| MVLG_05720F          | GCC GAA TTC AAC CCG TGG CCT CCG TCG GTT CAA   | Yeast two hybrid     |
| MVLG_05720R          | GAC GGA TCC CTA GTA ACC CGA ACG ACG CAT CCT   | Yeast two hybrid     |
| MVLG_06175F          | GCC GAA TTC TTT TGT CCC TTT GGA AAA ACG GCG   | Yeast two hybrid     |
| MVLG_06175R          | GAC GGA TCC TTA GAG ATT TAG AGG AAA GAA CCA   | Yeast two hybrid     |
| MVLG_01732F          | GCC GAA TTC TTG CAA GAA GCG GGC GAT ACC AAG   | Yeast two hybrid     |
| MVLG_01732R          | GAC GGA TCC CTA GGC GTG GAT TTT GCC GGA GAA   | Yeast two hybrid     |
| T7 Sequencing primer | AATACGACTCACTATAGGGCG                         | Yeast two hybrid     |
| MVLG_04106F          | GCC GAA TTC ATG AAG TAC TCG CTC GTC TTT GTC   | Yeast secretion trap |
| MVLG_04106R          | GCG GCC GCC GGC GAG AGC CGA GAC GAT GCG CGT G | Yeast secretion trap |
| MVLG_05720F          | GCC GAA TTC ATG ATG CGT TCC CTC ATC AAG TTG   | Yeast secretion trap |
| MVLG_05720R          | GCG GCC GCC CGC AAG AGC CAC ACT GAC GGC GGT G | Yeast secretion trap |
| MVLG_06175F          | GCC GAA TTC ATG TGG ACC TCT TCG ATC GTC CAA   | Yeast secretion trap |
| MVLG_06175R          | GCG GCC GCC AGC CCA CGC CAC GAC AGG GCT CGA G | Yeast secretion trap |
| MVLG_01732F          | GCC GAA TTC ATG CTG TTA AAG CTT ACC ATC ACC   | Yeast secretion trap |
| MVLG_01732R          | GCG GCC GCC TGC CGA AAC ATT GAG GAC GAG TAA G | Yeast secretion trap |
| Sequencing primer    | TCCTCGTCATTGTTCTCGTTCC                        | Yeast secretion trap |

**Figure S1: Structure of Protein: Domain structures of AtCLB protein from *Silene latifolia* drawn based on SMART searches (<http://smart.embl-heidelberg.de/>). The length of the protein and the positions of TM, C<sub>2</sub> domains are scaled below.**

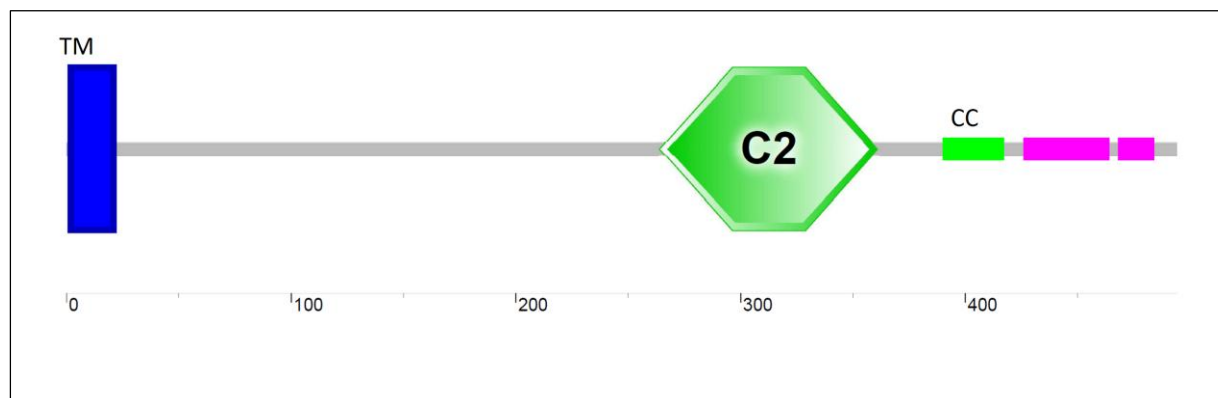

TM- Transmembrane region (amino acids 2-21), C<sub>2</sub> domain (amino acids 264-361), CC-Coiled coil (amino acids 390-417).

**Figure S2: Structure of Protein: Domain structures of the Cellulose Synthase Interactive 1 protein from *Silene latifolia* drawn based on SMART searches (<http://smart.embl-heidelberg.de/>). The length of the protein and the positions of ARM and C<sub>2</sub> domains are scaled below.**

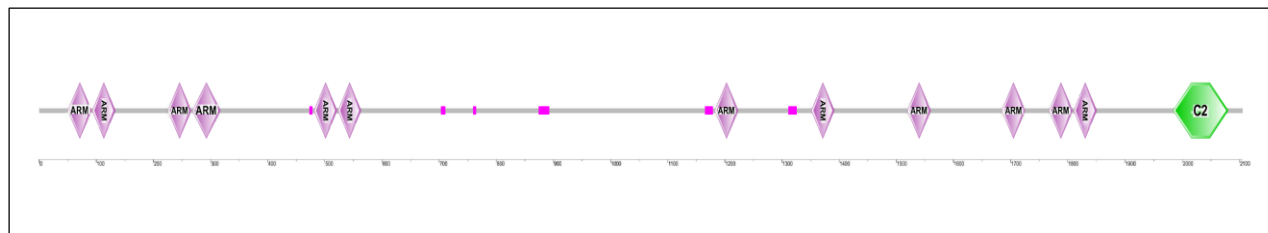

Arm repeats (amino acids 50-92, 93-133, 225-266, 268-317, 481-521, 523-563, 1182-1223, 1351-1391, 1519-1560, 1684-1725, 1767-1808, 1810-1850), C2 domain (amino acids 1984-2080)

**Figure S3: Predicted functional partners using STRING for the predicted MVLG\_01732 host target, AtCLB, *Arabidopsis thaliana* gene At3G61050.1, network and interactions with other proteins.**

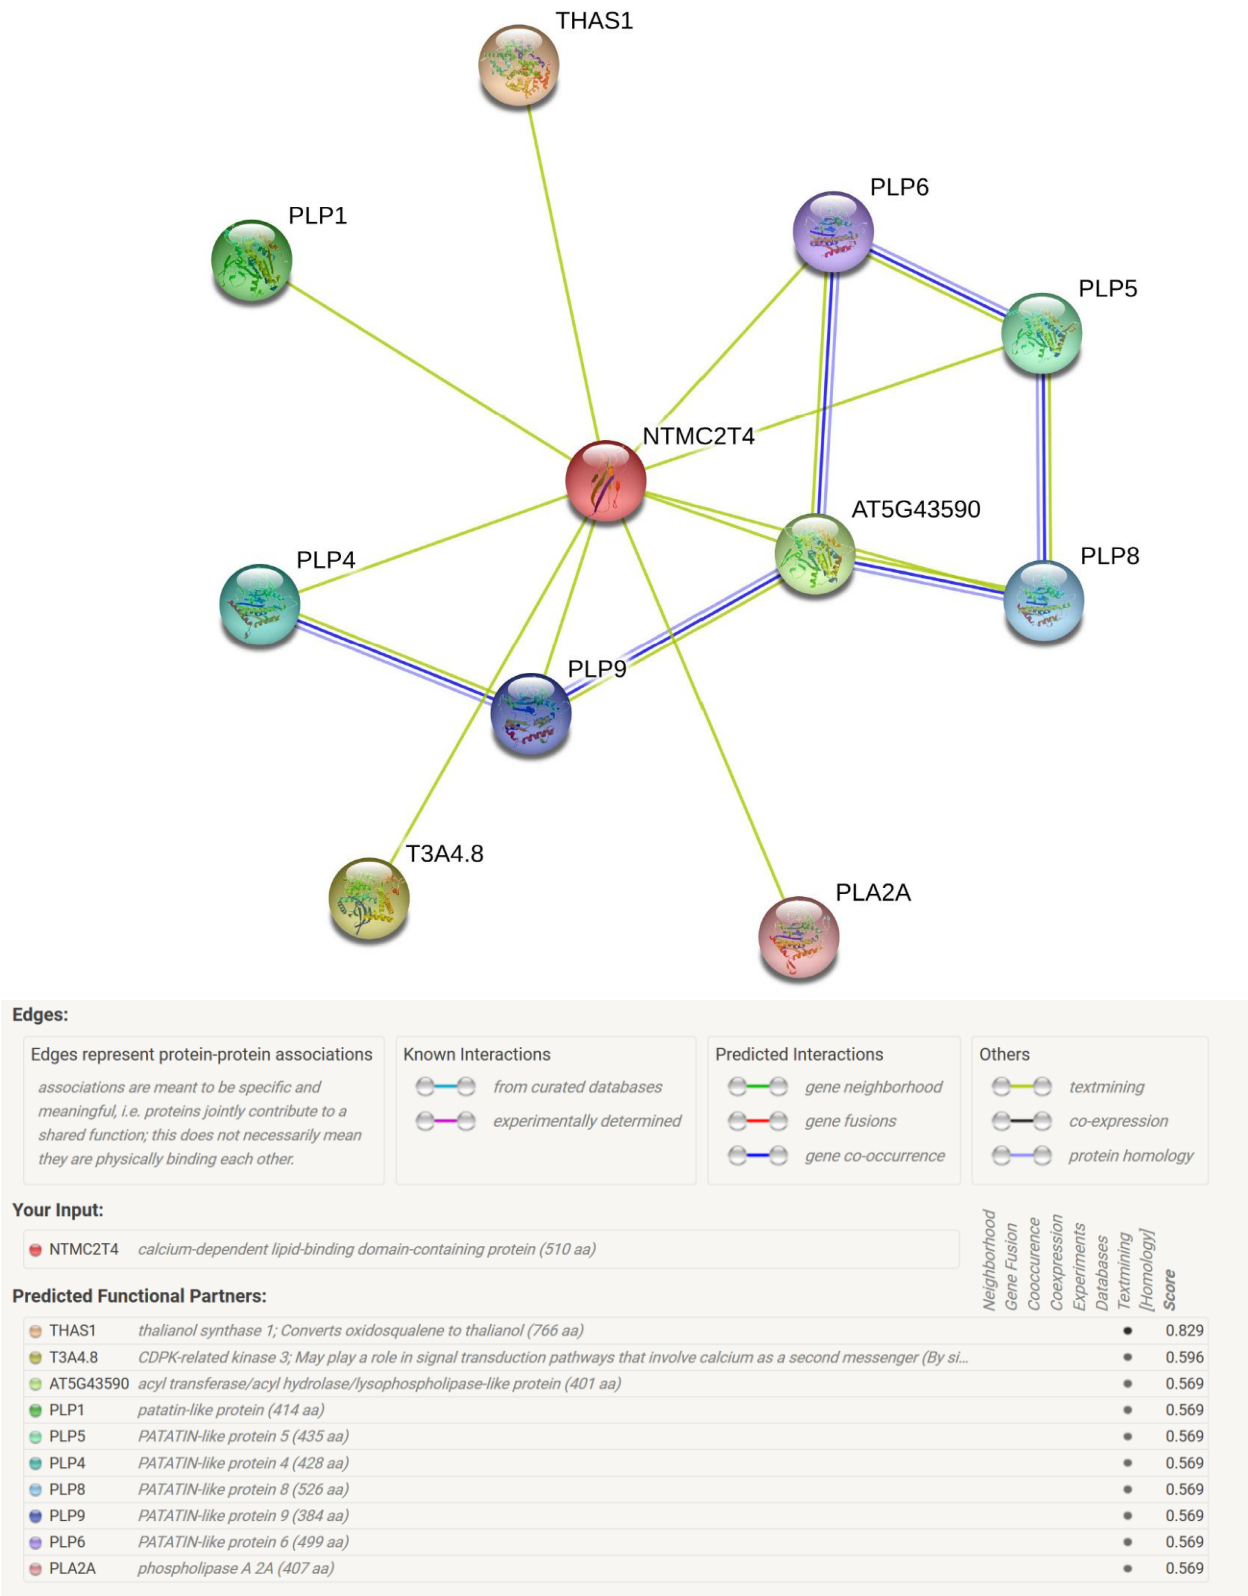

## Functional enrichments in the network

### Biological Process (GO)

| <i>pathway ID</i> | <i>pathway description</i>          | <i>count in gene set</i> | <i>false discovery rate</i> |
|-------------------|-------------------------------------|--------------------------|-----------------------------|
| GO:0016042        | lipid catabolic process             | 8                        | 5.46e-12                    |
| GO:0006629        | lipid metabolic process             | 9                        | 1.22e-09                    |
| GO:0006952        | defense response                    | 7                        | 3.16e-05                    |
| GO:0044238        | primary metabolic process           | 10                       | 0.00354                     |
| GO:0044699        | single-organism process             | 10                       | 0.0037                      |
| GO:0071704        | organic substance metabolic process | 10                       | 0.00408                     |
| GO:0050896        | response to stimulus                | 8                        | 0.0107                      |
| GO:0010311        | lateral root formation              | 2                        | 0.0249                      |
| GO:0048513        | organ development                   | 4                        | 0.0306                      |
| GO:0010102        | lateral root morphogenesis          | 2                        | 0.0373                      |

(less ...)

### Molecular Function (GO)

| <i>pathway ID</i> | <i>pathway description</i>   | <i>count in gene set</i> | <i>false discovery rate</i> |
|-------------------|------------------------------|--------------------------|-----------------------------|
| GO:0047372        | acylglycerol lipase activity | 3                        | 1.21e-06                    |
| GO:0016298        | lipase activity              | 4                        | 3.51e-05                    |
| GO:0016787        | hydrolase activity           | 8                        | 8.82e-05                    |
| GO:0004620        | phospholipase activity       | 3                        | 0.000517                    |
| GO:0003824        | catalytic activity           | 10                       | 0.000652                    |

| <b>▲ node1</b> | <b>node2</b> | <b>node1 accession</b> | <b>node2 accession</b> | <b>node1 annotation</b>            | <b>node2 annotation</b>            | <b>score</b> |
|----------------|--------------|------------------------|------------------------|------------------------------------|------------------------------------|--------------|
| AT5G43590      | NTMC2T4      | AT5G43590.1            | AT3G61050.1            | acyl transferase/acyl hydrolase... | calcium-dependent lipid-bindin...  | 0.569        |
| AT5G43590      | PLP6         | AT5G43590.1            | AT2G39220.1            | acyl transferase/acyl hydrolase... | PATATIN-like protein 6             | 0.407        |
| AT5G43590      | PLP8         | AT5G43590.1            | AT4G29800.2            | acyl transferase/acyl hydrolase... | PATATIN-like protein 8             | 0.430        |
| AT5G43590      | PLP9         | AT5G43590.1            | AT3G63200.1            | acyl transferase/acyl hydrolase... | PATATIN-like protein 9             | 0.421        |
| NTMC2T4        | AT5G43590    | AT3G61050.1            | AT5G43590.1            | calcium-dependent lipid-bindin...  | acyl transferase/acyl hydrolase... | 0.569        |
| NTMC2T4        | PLA2A        | AT3G61050.1            | AT2G26560.1            | calcium-dependent lipid-bindin...  | phospholipase A 2A                 | 0.569        |
| NTMC2T4        | PLP1         | AT3G61050.1            | AT4G37070.2            | calcium-dependent lipid-bindin...  | patatin-like protein               | 0.569        |
| NTMC2T4        | PLP4         | AT3G61050.1            | AT4G37050.1            | calcium-dependent lipid-bindin...  | PATATIN-like protein 4             | 0.569        |
| NTMC2T4        | PLP5         | AT3G61050.1            | AT4G37060.2            | calcium-dependent lipid-bindin...  | PATATIN-like protein 5             | 0.569        |
| NTMC2T4        | PLP6         | AT3G61050.1            | AT2G39220.1            | calcium-dependent lipid-bindin...  | PATATIN-like protein 6             | 0.569        |
| NTMC2T4        | PLP8         | AT3G61050.1            | AT4G29800.2            | calcium-dependent lipid-bindin...  | PATATIN-like protein 8             | 0.569        |
| NTMC2T4        | PLP9         | AT3G61050.1            | AT3G63200.1            | calcium-dependent lipid-bindin...  | PATATIN-like protein 9             | 0.569        |
| NTMC2T4        | T3A4.8       | AT3G61050.1            | AT2G46700.1            | calcium-dependent lipid-bindin...  | CDPK-related kinase 3; May pla...  | 0.596        |
| NTMC2T4        | THAS1        | AT3G61050.1            | AT5G48010.2            | calcium-dependent lipid-bindin...  | thalianol synthase 1; Converts ... | 0.829        |
| PLA2A          | NTMC2T4      | AT2G26560.1            | AT3G61050.1            | phospholipase A 2A                 | calcium-dependent lipid-bindin...  | 0.569        |
| PLP1           | NTMC2T4      | AT4G37070.2            | AT3G61050.1            | patatin-like protein               | calcium-dependent lipid-bindin...  | 0.569        |
| PLP4           | NTMC2T4      | AT4G37050.1            | AT3G61050.1            | PATATIN-like protein 4             | calcium-dependent lipid-bindin...  | 0.569        |
| PLP4           | PLP9         | AT4G37050.1            | AT3G63200.1            | PATATIN-like protein 4             | PATATIN-like protein 9             | 0.434        |
| PLP5           | NTMC2T4      | AT4G37060.2            | AT3G61050.1            | PATATIN-like protein 5             | calcium-dependent lipid-bindin...  | 0.569        |
| PLP5           | PLP6         | AT4G37060.2            | AT2G39220.1            | PATATIN-like protein 5             | PATATIN-like protein 6             | 0.418        |

| ▲ node1 | node2     | node1 accession | node2 accession | node1 annotation                             | node2 annotation                             | score |
|---------|-----------|-----------------|-----------------|----------------------------------------------|----------------------------------------------|-------|
| PLP5    | PLP8      | AT4G37060.2     | AT4G29800.2     | <i>PATATIN-like protein 5</i>                | <i>PATATIN-like protein 8</i>                | 0.426 |
| PLP6    | AT5G43590 | AT2G39220.1     | AT5G43590.1     | <i>PATATIN-like protein 6</i>                | <i>acyl transferase/acyl hydrolase/ly...</i> | 0.407 |
| PLP6    | NTMC2T4   | AT2G39220.1     | AT3G61050.1     | <i>PATATIN-like protein 6</i>                | <i>calcium-dependent lipid-binding d...</i>  | 0.569 |
| PLP6    | PLP5      | AT2G39220.1     | AT4G37060.2     | <i>PATATIN-like protein 6</i>                | <i>PATATIN-like protein 5</i>                | 0.418 |
| PLP8    | AT5G43590 | AT4G29800.2     | AT5G43590.1     | <i>PATATIN-like protein 8</i>                | <i>acyl transferase/acyl hydrolase/ly...</i> | 0.430 |
| PLP8    | NTMC2T4   | AT4G29800.2     | AT3G61050.1     | <i>PATATIN-like protein 8</i>                | <i>calcium-dependent lipid-binding d...</i>  | 0.569 |
| PLP8    | PLP5      | AT4G29800.2     | AT4G37060.2     | <i>PATATIN-like protein 8</i>                | <i>PATATIN-like protein 5</i>                | 0.426 |
| PLP9    | AT5G43590 | AT3G63200.1     | AT5G43590.1     | <i>PATATIN-like protein 9</i>                | <i>acyl transferase/acyl hydrolase/ly...</i> | 0.421 |
| PLP9    | NTMC2T4   | AT3G63200.1     | AT3G61050.1     | <i>PATATIN-like protein 9</i>                | <i>calcium-dependent lipid-binding d...</i>  | 0.569 |
| PLP9    | PLP4      | AT3G63200.1     | AT4G37050.1     | <i>PATATIN-like protein 9</i>                | <i>PATATIN-like protein 4</i>                | 0.434 |
| T3A4.8  | NTMC2T4   | AT2G46700.1     | AT3G61050.1     | <i>CDPK-related kinase 3; May play a...</i>  | <i>calcium-dependent lipid-binding d...</i>  | 0.596 |
| THAS1   | NTMC2T4   | AT5G48010.2     | AT3G61050.1     | <i>thalianol synthase 1; Converts oxi...</i> | <i>calcium-dependent lipid-binding d...</i>  | 0.829 |

NTMC2T4- FUNCTIONS IN: lipid binding; INVOLVED IN: biological\_process unknown; LOCATED IN: plasma membrane; EXPRESSED IN: male gametophyte, cultured cell, callus, pollen tube; EXPRESSED DURING: M germinated pollen stage; CONTAINS InterPro DOMAIN/s: C2 membrane targeting protein (InterPro:IPR018029), C2 calcium/lipid-binding domain, CaLB (InterPro:IPR008973), C2 region (InterPro:IPR020477), C2 calcium-dependent membrane targeting (InterPro:IPR000008); BEST Arabidopsis thaliana protein match is: Calcium-dependent lipid-binding (CaLB domain) family protein (TAIR:AT3G61030.1). /db\_xref="Araport:[AT3G61050](#)" , /db\_xref="GeneID:[825277](#)" , /db\_xref="TAIR:[AT3G61050](#)" [77].
